# Supplementary material for: The effects of solvation on the back reaction and storage capabilities of solar thermal energy storage systems
Source: Royal Society of Chemistry journal article supplement (doi:10.1039/d2cp00401a), 2022-01-01
Supplement: d2cp00401a1.pdf [file d2cp00401a1.pdf]

# Supporting Information: On the Effects of Solvation on the Back Reaction and Storage Capabilities of Solar Thermal Energy Storage Systems

Ida Lützen Hoff Kjeldsen, Julie Franck Høvring, Theo Juncker von Buchwald,  
Andreas Erbs Hillers-Bendtsen, and Kurt V. Mikkelsen

*Department of Chemistry, University of Copenhagen, Universitetsparken 5, 2100 Copenhagen Ø,  
Denmark.*

*E-mail: [kmi@chem.ku.dk](mailto:kmi@chem.ku.dk)*

# 1 Structures

## 1.1 m062x\_parent-DHA\_an

Gibbs free energy: -802.220463  
Electronic and ZPE: -802.176540

| Atom | X         | Y         | Z         |
|------|-----------|-----------|-----------|
| C    | -4.574371 | -0.305068 | -0.248813 |
| C    | -4.122870 | -1.318882 | 0.532906  |
| C    | -2.767704 | -1.821704 | 0.563439  |
| C    | -3.786861 | 0.434538  | -1.219126 |
| C    | -1.676939 | -1.063813 | 0.332558  |
| C    | -2.482844 | 0.731652  | -1.108438 |
| C    | -1.745782 | 0.436399  | 0.170637  |
| H    | -5.644011 | -0.118087 | -0.254349 |
| H    | -4.860367 | -1.881553 | 1.097466  |
| H    | -2.630836 | -2.877709 | 0.778694  |
| H    | -1.962732 | 1.202245  | -1.936293 |
| C    | -0.294761 | -1.485967 | 0.241544  |
| H    | -0.000314 | -2.527867 | 0.269627  |
| C    | 0.559938  | -0.453773 | 0.136558  |
| C    | -0.231088 | 0.872401  | 0.224383  |
| H    | -2.289207 | 0.887333  | 1.006503  |
| C    | 0.147953  | 1.802626  | -0.851642 |
| C    | 0.034768  | 1.525360  | 1.520847  |
| N    | 0.439736  | 2.508359  | -1.708385 |
| N    | 0.218562  | 1.999677  | 2.550003  |
| H    | -4.308085 | 0.753094  | -2.117473 |
| C    | 2.019353  | -0.493264 | -0.011383 |
| C    | 2.643324  | -1.677077 | -0.435277 |
| C    | 2.821237  | 0.623518  | 0.257951  |
| C    | 4.022499  | -1.744923 | -0.564487 |
| H    | 2.043751  | -2.545233 | -0.683524 |
| C    | 4.204216  | 0.553182  | 0.125290  |
| H    | 2.383836  | 1.559585  | 0.586123  |
| C    | 4.810261  | -0.629553 | -0.282987 |
| H    | 4.484367  | -2.667659 | -0.896065 |
| H    | 4.805962  | 1.427786  | 0.343060  |
| H    | 5.887568  | -0.682108 | -0.388854 |

## 1.2 m062x\_parent-DHA\_ch

Gibbs free energy: -802.212533  
Electronic and ZPE: -802.168711

| Atom | X         | Y         | Z         |
|------|-----------|-----------|-----------|
| C    | -4.569556 | -0.308113 | -0.255971 |
| C    | -4.122066 | -1.311563 | 0.540349  |
| C    | -2.767808 | -1.814832 | 0.582240  |
| C    | -3.777913 | 0.418176  | -1.232246 |
| C    | -1.675787 | -1.061173 | 0.345306  |
| C    | -2.474609 | 0.715848  | -1.119674 |
| C    | -1.743285 | 0.437049  | 0.166215  |
| H    | -5.638820 | -0.118593 | -0.265414 |
| H    | -4.862102 | -1.864323 | 1.111574  |
| H    | -2.633547 | -2.868651 | 0.810405  |
| H    | -1.949207 | 1.177366  | -1.949332 |
| C    | -0.293031 | -1.482812 | 0.259570  |
| H    | 0.004367  | -2.523682 | 0.298986  |
| C    | 0.560896  | -0.451360 | 0.144372  |
| C    | -0.229711 | 0.874915  | 0.221553  |
| H    | -2.291852 | 0.896097  | 0.994439  |
| C    | 0.148977  | 1.798009  | -0.860440 |
| C    | 0.030365  | 1.536431  | 1.514704  |
| N    | 0.433809  | 2.499832  | -1.722765 |
| N    | 0.206669  | 2.021963  | 2.539963  |
| H    | -4.294946 | 0.725853  | -2.136827 |
| C    | 2.019406  | -0.493040 | -0.006284 |
| C    | 2.639802  | -1.673639 | -0.441663 |
| C    | 2.822779  | 0.619776  | 0.270646  |
| C    | 4.017944  | -1.744127 | -0.573082 |
| H    | 2.035956  | -2.535949 | -0.700486 |
| C    | 4.204591  | 0.546876  | 0.135973  |
| H    | 2.385389  | 1.552783  | 0.606885  |
| C    | 4.807430  | -0.633248 | -0.282370 |
| H    | 4.477872  | -2.664207 | -0.914894 |
| H    | 4.808443  | 1.418538  | 0.359409  |
| H    | 5.884552  | -0.686834 | -0.390320 |

### 1.3 m062x\_parent-DHA\_dcm

Gibbs free energy: -802.218613  
Electronic and ZPE: -802.174736

| Atom | X         | Y         | Z         |
|------|-----------|-----------|-----------|
| C    | -4.573076 | -0.305748 | -0.250559 |
| C    | -4.122542 | -1.317170 | 0.534588  |
| C    | -2.767637 | -1.820263 | 0.567603  |
| C    | -3.784572 | 0.430538  | -1.222408 |
| C    | -1.676545 | -1.063428 | 0.335260  |
| C    | -2.480692 | 0.727641  | -1.111297 |
| C    | -1.745133 | 0.436317  | 0.169504  |
| H    | -5.642603 | -0.118055 | -0.256924 |
| H    | -4.860624 | -1.877455 | 1.100812  |
| H    | -2.631511 | -2.875828 | 0.785691  |
| H    | -1.959232 | 1.195721  | -1.939736 |
| C    | -0.294242 | -1.485423 | 0.245090  |
| H    | 0.000865  | -2.527113 | 0.275558  |
| C    | 0.560318  | -0.453396 | 0.137872  |
| C    | -0.230688 | 0.872743  | 0.223847  |
| H    | -2.289963 | 0.889044  | 1.003522  |
| C    | 0.147853  | 1.802291  | -0.852891 |
| C    | 0.033602  | 1.527104  | 1.519904  |
| N    | 0.437229  | 2.508380  | -1.710163 |
| N    | 0.215057  | 2.003837  | 2.548365  |
| H    | -4.304747 | 0.746392  | -2.122323 |
| C    | 2.019519  | -0.493228 | -0.010621 |
| C    | 2.642879  | -1.676360 | -0.436686 |
| C    | 2.821533  | 0.622818  | 0.260194  |
| C    | 4.021820  | -1.744669 | -0.566177 |
| H    | 2.042504  | -2.543360 | -0.687197 |
| C    | 4.204251  | 0.552066  | 0.127274  |
| H    | 2.384029  | 1.558251  | 0.589890  |
| C    | 4.809768  | -0.630113 | -0.282831 |
| H    | 4.483444  | -2.666836 | -0.899760 |
| H    | 4.806291  | 1.426185  | 0.346087  |
| H    | 5.887053  | -0.682772 | -0.389037 |

### 1.4 m062x\_parent-DHA\_m

Gibbs free energy: -802.220400  
Electronic and ZPE: -802.176479

| Atom | X         | Y         | Z         |
|------|-----------|-----------|-----------|
| C    | -4.574326 | -0.305091 | -0.248868 |
| C    | -4.122856 | -1.318827 | 0.532963  |
| C    | -2.767699 | -1.821659 | 0.563573  |
| C    | -3.786785 | 0.434404  | -1.219233 |
| C    | -1.676924 | -1.063804 | 0.332642  |
| C    | -2.482772 | 0.731516  | -1.108533 |
| C    | -1.745760 | 0.436392  | 0.170599  |
| H    | -5.643963 | -0.118085 | -0.254428 |
| H    | -4.860372 | -1.881419 | 1.097579  |
| H    | -2.630857 | -2.877651 | 0.778917  |
| H    | -1.962614 | 1.202023  | -1.936409 |
| C    | -0.294741 | -1.485951 | 0.241648  |
| H    | -0.000272 | -2.527845 | 0.269807  |
| C    | 0.559953  | -0.453763 | 0.136593  |
| C    | -0.231074 | 0.872409  | 0.224366  |
| H    | -2.289232 | 0.887382  | 1.006405  |
| C    | 0.147943  | 1.802625  | -0.851674 |
| C    | 0.034730  | 1.525406  | 1.520821  |
| N    | 0.439633  | 2.508386  | -1.708426 |
| N    | 0.218440  | 1.999802  | 2.549956  |
| H    | -4.307974 | 0.752870  | -2.117633 |
| C    | 2.019361  | -0.493263 | -0.011365 |
| C    | 2.643316  | -1.677053 | -0.435325 |
| C    | 2.821246  | 0.623497  | 0.258016  |
| C    | 4.022482  | -1.744913 | -0.564539 |
| H    | 2.043719  | -2.545173 | -0.683646 |
| C    | 4.204216  | 0.553150  | 0.125352  |
| H    | 2.383839  | 1.559543  | 0.586235  |
| C    | 4.810247  | -0.629567 | -0.282979 |
| H    | 4.484346  | -2.667630 | -0.896179 |
| H    | 4.805969  | 1.427740  | 0.343155  |
| H    | 5.887554  | -0.682123 | -0.388854 |

## 1.5 m062x\_parent-DHA\_t

Gibbs free energy: -802.213500

Electronic and ZPE: -802.169676

| Atom | X         | Y         | Z         |
|------|-----------|-----------|-----------|
| C    | -4.570027 | -0.307717 | -0.255235 |
| C    | -4.122104 | -1.312405 | 0.539389  |
| C    | -2.767767 | -1.815717 | 0.579883  |
| C    | -3.778832 | 0.420015  | -1.230878 |
| C    | -1.675869 | -1.061597 | 0.343662  |
| C    | -2.475429 | 0.717544  | -1.118515 |
| C    | -1.743553 | 0.436860  | 0.166668  |
| H    | -5.639320 | -0.118423 | -0.264195 |
| H    | -4.861850 | -1.866286 | 1.109875  |
| H    | -2.633274 | -2.869830 | 0.806442  |
| H    | -1.950580 | 1.179918  | -1.948040 |
| C    | -0.293188 | -1.483286 | 0.257131  |
| H    | 0.003835  | -2.524299 | 0.295056  |
| C    | 0.560861  | -0.451749 | 0.143217  |
| C    | -0.229838 | 0.874489  | 0.221980  |
| H    | -2.291645 | 0.894917  | 0.995734  |
| C    | 0.148724  | 1.798963  | -0.858922 |
| C    | 0.030772  | 1.534657  | 1.515738  |
| N    | 0.434040  | 2.501918  | -1.720154 |
| N    | 0.207607  | 2.018719  | 2.541597  |
| H    | -4.296303 | 0.728888  | -2.134794 |
| C    | 2.019473  | -0.493080 | -0.007092 |
| C    | 2.640409  | -1.674119 | -0.440798 |
| C    | 2.822560  | 0.620322  | 0.268713  |
| C    | 4.018674  | -1.744210 | -0.571865 |
| H    | 2.037172  | -2.537255 | -0.698189 |
| C    | 4.204515  | 0.547828  | 0.134353  |
| H    | 2.385127  | 1.553756  | 0.603769  |
| C    | 4.807846  | -0.632652 | -0.282482 |
| H    | 4.478938  | -2.664648 | -0.912227 |
| H    | 4.808011  | 1.419963  | 0.356912  |
| H    | 5.884998  | -0.686045 | -0.390138 |

## 1.6 m062x\_parent-TS-WH\_an

Gibbs free energy: -802.174990

Electronic and ZPE: -802.129571

| Atom | X         | Y         | Z         |
|------|-----------|-----------|-----------|
| C    | 4.455999  | -0.978063 | 0.566048  |
| C    | 3.666977  | -2.029058 | 0.159811  |
| C    | 2.363822  | -1.990841 | -0.375887 |
| C    | 1.594008  | -0.902640 | -0.729860 |
| C    | 2.030473  | 0.461078  | -0.827162 |
| C    | 3.174877  | 1.027621  | -0.234243 |
| C    | 4.204949  | 0.403177  | 0.432664  |
| C    | 0.162411  | -1.089958 | -0.899051 |
| C    | -0.662335 | -0.143958 | -0.392018 |
| C    | -0.060860 | 1.145302  | 0.081952  |
| C    | -0.022646 | 1.356621  | 1.479728  |
| N    | 0.077661  | 1.481461  | 2.626916  |
| C    | -0.125075 | 2.296056  | -0.730426 |
| N    | -0.133585 | 3.211924  | -1.440250 |
| H    | 5.398999  | -1.239748 | 1.033905  |
| H    | 4.063680  | -3.022744 | 0.338807  |
| H    | 1.878716  | -2.957750 | -0.479948 |
| H    | 1.584135  | 1.037486  | -1.626273 |
| H    | 3.262294  | 2.104468  | -0.348471 |
| H    | -0.212204 | -2.052960 | -1.228357 |
| C    | -2.106253 | -0.387065 | -0.167051 |
| C    | -2.997918 | 0.691090  | -0.096292 |
| C    | -2.613697 | -1.685635 | -0.012836 |
| C    | -4.358746 | 0.477318  | 0.095348  |
| H    | -2.629439 | 1.704643  | -0.206664 |
| C    | -3.972195 | -1.897642 | 0.179952  |
| H    | -1.940855 | -2.535345 | -0.011344 |
| C    | -4.850863 | -0.816946 | 0.230744  |
| H    | -5.033790 | 1.324254  | 0.138377  |
| H    | -4.344872 | -2.907683 | 0.306070  |
| H    | -5.910660 | -0.984004 | 0.385320  |
| H    | 4.977890  | 1.056944  | 0.823380  |

## 1.7 m062x\_parent-TS-WH\_ch

Gibbs free energy: -802.159893  
Electronic and ZPE: -802.115232

| Atom | X         | Y         | Z         |
|------|-----------|-----------|-----------|
| C    | 4.305093  | -1.145222 | 0.771536  |
| C    | 3.619408  | -2.084129 | 0.025714  |
| C    | 2.397452  | -1.936392 | -0.647749 |
| C    | 1.628449  | -0.798229 | -0.825595 |
| C    | 2.100289  | 0.560696  | -0.661962 |
| C    | 3.125285  | 0.984918  | 0.195375  |
| C    | 4.041733  | 0.227780  | 0.899792  |
| C    | 0.222263  | -0.946538 | -1.069569 |
| C    | -0.627377 | -0.046003 | -0.491112 |
| C    | -0.102165 | 1.249338  | -0.019944 |
| C    | -0.333542 | 1.593559  | 1.342694  |
| N    | -0.446358 | 1.835085  | 2.466801  |
| C    | -0.003566 | 2.339293  | -0.920406 |
| N    | 0.121325  | 3.200419  | -1.682261 |
| H    | 5.172305  | -1.509784 | 1.312857  |
| H    | 4.022469  | -3.091473 | 0.040019  |
| H    | 1.952794  | -2.859806 | -1.011899 |
| H    | 1.823788  | 1.252971  | -1.444136 |
| H    | 3.223794  | 2.063621  | 0.287171  |
| H    | -0.153114 | -1.892302 | -1.446199 |
| C    | -2.032438 | -0.399513 | -0.193146 |
| C    | -3.010263 | 0.602349  | -0.159689 |
| C    | -2.415438 | -1.723139 | 0.060352  |
| C    | -4.338287 | 0.285853  | 0.096451  |
| H    | -2.729140 | 1.631911  | -0.352852 |
| C    | -3.742726 | -2.037960 | 0.317388  |
| H    | -1.664247 | -2.504272 | 0.093853  |
| C    | -4.708371 | -1.034492 | 0.332656  |
| H    | -5.084272 | 1.071887  | 0.111785  |
| H    | -4.022503 | -3.064809 | 0.523350  |
| H    | -5.743897 | -1.280293 | 0.538754  |
| H    | 4.722444  | 0.780814  | 1.538784  |

## 1.8 m062x\_parent-TS-WH\_dcm

Gibbs free energy: -802.171339  
Electronic and ZPE: -802.126176

| Atom | X         | Y         | Z         |
|------|-----------|-----------|-----------|
| C    | 4.437382  | -1.014445 | 0.610050  |
| C    | 3.658991  | -2.047542 | 0.137562  |
| C    | 2.370428  | -1.985934 | -0.425864 |
| C    | 1.605523  | -0.881839 | -0.745598 |
| C    | 2.055413  | 0.481761  | -0.791467 |
| C    | 3.183294  | 1.021460  | -0.148256 |
| C    | 4.192954  | 0.370087  | 0.526588  |
| C    | 0.178375  | -1.058762 | -0.930491 |
| C    | -0.652277 | -0.122552 | -0.408608 |
| C    | -0.073737 | 1.170581  | 0.067942  |
| C    | -0.121010 | 1.417015  | 1.461999  |
| N    | -0.091936 | 1.572091  | 2.608856  |
| C    | -0.094389 | 2.304695  | -0.771605 |
| N    | -0.066049 | 3.205195  | -1.499841 |
| H    | 5.366233  | -1.298211 | 1.093519  |
| H    | 4.051118  | -3.048129 | 0.285723  |
| H    | 1.887471  | -2.947328 | -0.580819 |
| H    | 1.636542  | 1.085260  | -1.584810 |
| H    | 3.277168  | 2.101314  | -0.223181 |
| H    | -0.198030 | -2.017576 | -1.270439 |
| C    | -2.089548 | -0.391234 | -0.172664 |
| C    | -3.002549 | 0.670246  | -0.131102 |
| C    | -2.568570 | -1.695191 | 0.017760  |
| C    | -4.358097 | 0.433381  | 0.067226  |
| H    | -2.653122 | 1.687096  | -0.270980 |
| C    | -3.922256 | -1.930258 | 0.217624  |
| H    | -1.875887 | -2.528594 | 0.043564  |
| C    | -4.822596 | -0.866914 | 0.238815  |
| H    | -5.050989 | 1.266617  | 0.087451  |
| H    | -4.274281 | -2.943703 | 0.372753  |
| H    | -5.878651 | -1.051561 | 0.399134  |
| H    | 4.954345  | 1.006493  | 0.965521  |

## 1.9 m062x\_parent-TS-WH\_m

Gibbs free energy: -802.174860  
Electronic and ZPE: -802.129455

| Atom | X         | Y         | Z         |
|------|-----------|-----------|-----------|
| C    | 4.455523  | -0.979286 | 0.567456  |
| C    | 3.666770  | -2.029713 | 0.159062  |
| C    | 2.364077  | -1.990701 | -0.377547 |
| C    | 1.594453  | -0.901926 | -0.730362 |
| C    | 2.031378  | 0.461810  | -0.825907 |
| C    | 3.175315  | 1.027463  | -0.231375 |
| C    | 4.204756  | 0.402104  | 0.435726  |
| C    | 0.162997  | -1.088886 | -0.900105 |
| C    | -0.661951 | -0.143236 | -0.392550 |
| C    | -0.061291 | 1.146155  | 0.081611  |
| C    | -0.026324 | 1.358663  | 1.479376  |
| N    | 0.071234  | 1.484527  | 2.626666  |
| C    | -0.124004 | 2.296361  | -0.731723 |
| N    | -0.131228 | 3.211718  | -1.442205 |
| H    | 5.398078  | -1.241719 | 1.035806  |
| H    | 4.063285  | -3.023658 | 0.337039  |
| H    | 1.879002  | -2.957449 | -0.483312 |
| H    | 1.585895  | 1.039162  | -1.624791 |
| H    | 3.262971  | 2.104434  | -0.344285 |
| H    | -0.211696 | -2.051722 | -1.229837 |
| C    | -2.105661 | -0.387219 | -0.167279 |
| C    | -2.998096 | 0.690377  | -0.097850 |
| C    | -2.612099 | -1.685980 | -0.011568 |
| C    | -4.358763 | 0.475808  | 0.093924  |
| H    | -2.630285 | 1.704047  | -0.209434 |
| C    | -3.970454 | -1.898782 | 0.181376  |
| H    | -1.938528 | -2.535118 | -0.008973 |
| C    | -4.849907 | -0.818676 | 0.230810  |
| H    | -5.034457 | 1.322277  | 0.135903  |
| H    | -4.342404 | -2.908942 | 0.308695  |
| H    | -5.909591 | -0.986338 | 0.385514  |
| H    | 4.977384  | 1.055304  | 0.828001  |

## 1.10 m062x\_parent-TS-WH\_t

Gibbs free energy: -802.161736  
Electronic and ZPE: -802.116977

| Atom | X         | Y         | Z         |
|------|-----------|-----------|-----------|
| C    | 4.323969  | -1.129679 | 0.753393  |
| C    | 3.623104  | -2.082715 | 0.041491  |
| C    | 2.392270  | -1.945267 | -0.619088 |
| C    | 1.626424  | -0.808921 | -0.816285 |
| C    | 2.097396  | 0.551355  | -0.678897 |
| C    | 3.137874  | 0.991161  | 0.152557  |
| C    | 4.066196  | 0.247273  | 0.854523  |
| C    | 0.217225  | -0.960136 | -1.053615 |
| C    | -0.629939 | -0.055427 | -0.481737 |
| C    | -0.098988 | 1.240185  | -0.009252 |
| C    | -0.312387 | 1.573476  | 1.357982  |
| N    | -0.411773 | 1.805076  | 2.485757  |
| C    | -0.014938 | 2.335121  | -0.903758 |
| N    | 0.098502  | 3.200562  | -1.662949 |
| H    | 5.199052  | -1.484297 | 1.288507  |
| H    | 4.022316  | -3.091102 | 0.073060  |
| H    | 1.940165  | -2.875084 | -0.956507 |
| H    | 1.802133  | 1.233319  | -1.463322 |
| H    | 3.237598  | 2.071271  | 0.223304  |
| H    | -0.158604 | -1.907515 | -1.425590 |
| C    | -2.039432 | -0.398688 | -0.191320 |
| C    | -3.009688 | 0.610607  | -0.158904 |
| C    | -2.433972 | -1.719986 | 0.057257  |
| C    | -4.341388 | 0.303825  | 0.090765  |
| H    | -2.720169 | 1.638654  | -0.347558 |
| C    | -3.764805 | -2.025063 | 0.307979  |
| H    | -1.689544 | -2.507501 | 0.091678  |
| C    | -4.722875 | -1.014205 | 0.321855  |
| H    | -5.081202 | 1.095702  | 0.105073  |
| H    | -4.053327 | -3.050271 | 0.509980  |
| H    | -5.761118 | -1.252508 | 0.522975  |
| H    | 4.759329  | 0.812365  | 1.469059  |

### 1.11 m062x\_parent-TS-ZI\_an

Gibbs free energy: -802.177565  
Electronic and ZPE: -802.132870

| Atom | X         | Y         | Z         |
|------|-----------|-----------|-----------|
| C    | -4.571038 | -0.637789 | 0.265688  |
| C    | -3.794606 | -1.737531 | 0.512829  |
| C    | -2.406548 | -1.912893 | 0.282432  |
| C    | -4.181732 | 0.572540  | -0.361528 |
| C    | -1.520460 | -1.096339 | -0.376501 |
| C    | -2.995531 | 0.896167  | -0.971011 |
| C    | -1.801872 | 0.140843  | -1.047555 |
| H    | -5.607391 | -0.692343 | 0.579526  |
| H    | -4.286455 | -2.571804 | 1.002441  |
| H    | -1.982884 | -2.823982 | 0.695045  |
| H    | -4.964572 | 1.320660  | -0.442557 |
| H    | -2.969875 | 1.845600  | -1.497003 |
| C    | -0.080079 | -1.372785 | -0.333154 |
| C    | 0.715161  | -0.303812 | -0.123854 |
| C    | 0.015061  | 1.008059  | 0.086798  |
| C    | 0.430369  | 2.144114  | -0.643421 |
| C    | -0.650035 | 1.230885  | 1.309831  |
| N    | 0.746893  | 3.047984  | -1.293627 |
| N    | -1.278414 | 1.359253  | 2.274850  |
| H    | -1.143798 | 0.379338  | -1.874584 |
| H    | 0.290149  | -2.391531 | -0.328253 |
| C    | 2.185934  | -0.385000 | -0.025701 |
| C    | 2.901127  | 0.540290  | 0.743414  |
| C    | 2.890215  | -1.390476 | -0.701708 |
| C    | 4.283682  | 0.444992  | 0.857695  |
| H    | 2.372001  | 1.330411  | 1.265354  |
| C    | 4.271348  | -1.480619 | -0.590993 |
| H    | 2.355498  | -2.089398 | -1.335623 |
| C    | 4.972328  | -0.565275 | 0.192332  |
| H    | 4.823188  | 1.163167  | 1.464291  |
| H    | 4.803892  | -2.258893 | -1.125457 |
| H    | 6.050951  | -0.634107 | 0.274705  |

### 1.12 m062x\_parent-TS-ZI\_ch

Gibbs free energy: -802.163109  
Electronic and ZPE: -802.118629

| Atom | X         | Y         | Z         |
|------|-----------|-----------|-----------|
| C    | -4.581454 | -0.623342 | 0.203245  |
| C    | -3.794531 | -1.698987 | 0.527469  |
| C    | -2.404898 | -1.872336 | 0.341347  |
| C    | -4.186540 | 0.553833  | -0.470707 |
| C    | -1.505280 | -1.083507 | -0.344232 |
| C    | -2.985474 | 0.856760  | -1.067634 |
| C    | -1.787373 | 0.112485  | -1.075840 |
| H    | -5.622280 | -0.671869 | 0.503153  |
| H    | -4.289141 | -2.507618 | 1.057062  |
| H    | -1.981576 | -2.751154 | 0.819097  |
| H    | -4.968672 | 1.296266  | -0.599906 |
| H    | -2.950061 | 1.784491  | -1.630564 |
| C    | -0.067923 | -1.361636 | -0.276740 |
| C    | 0.730758  | -0.289026 | -0.074454 |
| C    | 0.042780  | 1.014975  | 0.149724  |
| C    | 0.474152  | 2.168839  | -0.544188 |
| C    | -0.742904 | 1.191468  | 1.307380  |
| N    | 0.797737  | 3.086588  | -1.169942 |
| N    | -1.461511 | 1.278822  | 2.211531  |
| H    | -1.078363 | 0.360075  | -1.856076 |
| H    | 0.299476  | -2.381196 | -0.247030 |
| C    | 2.202235  | -0.377579 | -0.012038 |
| C    | 2.935327  | 0.529173  | 0.760707  |
| C    | 2.887245  | -1.371312 | -0.722856 |
| C    | 4.318639  | 0.426602  | 0.843172  |
| H    | 2.416702  | 1.309648  | 1.306594  |
| C    | 4.269221  | -1.469470 | -0.643038 |
| H    | 2.334400  | -2.050852 | -1.362617 |
| C    | 4.988484  | -0.572624 | 0.144008  |
| H    | 4.873983  | 1.131724  | 1.450659  |
| H    | 4.788665  | -2.237077 | -1.205308 |
| H    | 6.068511  | -0.646205 | 0.201854  |

### 1.13 m062x\_parent-TS-ZI\_dcm

Gibbs free energy: -802.174194  
Electronic and ZPE: -802.129630

| Atom | X         | Y         | Z         |
|------|-----------|-----------|-----------|
| C    | -4.574304 | -0.635269 | 0.249841  |
| C    | -3.794825 | -1.729108 | 0.516420  |
| C    | -2.406015 | -1.903621 | 0.297125  |
| C    | -4.184304 | 0.567480  | -0.388795 |
| C    | -1.517157 | -1.093375 | -0.368288 |
| C    | -2.994305 | 0.886574  | -0.994717 |
| C    | -1.799241 | 0.134091  | -1.053929 |
| H    | -5.611902 | -0.688844 | 0.559725  |
| H    | -4.287051 | -2.557488 | 1.015857  |
| H    | -1.982100 | -2.807193 | 0.725716  |
| H    | -4.967449 | 1.313936  | -0.481829 |
| H    | -2.966486 | 1.830811  | -1.529882 |
| C    | -0.077051 | -1.369760 | -0.319572 |
| C    | 0.719012  | -0.300138 | -0.112128 |
| C    | 0.022072  | 1.010350  | 0.102262  |
| C    | 0.438734  | 2.150243  | -0.621055 |
| C    | -0.669103 | 1.222017  | 1.312615  |
| N    | 0.754241  | 3.057221  | -1.267298 |
| N    | -1.315931 | 1.340997  | 2.266484  |
| H    | -1.128051 | 0.374992  | -1.869402 |
| H    | 0.292901  | -2.388653 | -0.309728 |
| C    | 2.190038  | -0.383298 | -0.022639 |
| C    | 2.909482  | 0.537047  | 0.747975  |
| C    | 2.889739  | -1.385249 | -0.708184 |
| C    | 4.292300  | 0.440035  | 0.854290  |
| H    | 2.382771  | 1.324412  | 1.276327  |
| C    | 4.271179  | -1.477196 | -0.605329 |
| H    | 2.350642  | -2.078883 | -1.344291 |
| C    | 4.976527  | -0.566901 | 0.179682  |
| H    | 4.835603  | 1.154738  | 1.461556  |
| H    | 4.800709  | -2.252218 | -1.147526 |
| H    | 6.055586  | -0.636671 | 0.255729  |

### 1.14 m062x\_parent-TS-ZI\_m

Gibbs free energy: -802.177452  
Electronic and ZPE: -802.132762

| Atom | X         | Y         | Z         |
|------|-----------|-----------|-----------|
| C    | -4.571136 | -0.637679 | 0.265126  |
| C    | -3.794609 | -1.737224 | 0.512956  |
| C    | -2.406522 | -1.912573 | 0.282944  |
| C    | -4.181797 | 0.572381  | -0.362504 |
| C    | -1.520336 | -1.096255 | -0.376224 |
| C    | -2.995462 | 0.895837  | -0.971863 |
| C    | -1.801754 | 0.140600  | -1.047785 |
| H    | -5.607533 | -0.692182 | 0.578827  |
| H    | -4.286476 | -2.571286 | 1.002917  |
| H    | -1.982856 | -2.823406 | 0.696123  |
| H    | -4.964645 | 1.320447  | -0.443961 |
| H    | -2.969723 | 1.845086  | -1.498183 |
| C    | -0.079961 | -1.372698 | -0.332687 |
| C    | 0.715296  | -0.303699 | -0.123442 |
| C    | 0.015284  | 1.008119  | 0.087343  |
| C    | 0.430622  | 2.144320  | -0.642623 |
| C    | -0.650719 | 1.230533  | 1.309952  |
| N    | 0.747090  | 3.048311  | -1.292685 |
| N    | -1.279751 | 1.358546  | 2.274589  |
| H    | -1.143217 | 0.379158  | -1.874419 |
| H    | 0.290266  | -2.391446 | -0.327628 |
| C    | 2.186080  | -0.384938 | -0.025589 |
| C    | 2.901409  | 0.540176  | 0.743593  |
| C    | 2.890214  | -1.390269 | -0.701951 |
| C    | 4.283976  | 0.444836  | 0.857589  |
| H    | 2.372357  | 1.330186  | 1.265772  |
| C    | 4.271360  | -1.480457 | -0.591517 |
| H    | 2.355351  | -2.089002 | -1.335955 |
| C    | 4.972481  | -0.565293 | 0.191882  |
| H    | 4.823607  | 1.162888  | 1.464218  |
| H    | 4.803809  | -2.258600 | -1.126270 |
| H    | 6.051122  | -0.634143 | 0.274027  |



### 1.15 m062x\_parent-TS-ZI\_t

Gibbs free energy: -802.164994  
Electronic and ZPE: -802.120427

| Atom | X         | Y         | Z         |
|------|-----------|-----------|-----------|
| C    | -4.580357 | -0.626147 | 0.210579  |
| C    | -3.794001 | -1.704453 | 0.525699  |
| C    | -2.404373 | -1.877357 | 0.334206  |
| C    | -4.186926 | 0.555446  | -0.457645 |
| C    | -1.507053 | -1.084768 | -0.348566 |
| C    | -2.987765 | 0.861446  | -1.056182 |
| C    | -1.789924 | 0.116219  | -1.072687 |
| H    | -5.620637 | -0.676022 | 0.512121  |
| H    | -4.287766 | -2.516496 | 1.050669  |
| H    | -1.980430 | -2.760023 | 0.804273  |
| H    | -4.969537 | 1.298342  | -0.580772 |
| H    | -2.953966 | 1.791984  | -1.614543 |
| C    | -0.069019 | -1.362303 | -0.284619 |
| C    | 0.729199  | -0.290333 | -0.080950 |
| C    | 0.039941  | 1.014726  | 0.142599  |
| C    | 0.467959  | 2.166620  | -0.556047 |
| C    | -0.731106 | 1.195711  | 1.309136  |
| N    | 0.789241  | 3.082925  | -1.185318 |
| N    | -1.438405 | 1.287355  | 2.221844  |
| H    | -1.086511 | 0.363616  | -1.858076 |
| H    | 0.298978  | -2.381749 | -0.258977 |
| C    | 2.200627  | -0.378250 | -0.014051 |
| C    | 2.931430  | 0.530188  | 0.759016  |
| C    | 2.888071  | -1.372938 | -0.721335 |
| C    | 4.314659  | 0.428310  | 0.845527  |
| H    | 2.411407  | 1.311498  | 1.302420  |
| C    | 4.269952  | -1.470280 | -0.637624 |
| H    | 2.337516  | -2.054250 | -1.361153 |
| C    | 4.986889  | -0.571812 | 0.149824  |
| H    | 4.867998  | 1.134618  | 1.453475  |
| H    | 4.791107  | -2.238746 | -1.197117 |
| H    | 6.066770  | -0.644883 | 0.210715  |

### 1.16 m062x\_parent-VHF-cis\_an

Gibbs free energy: -802.211842  
Electronic and ZPE: -802.166263

| Atom | X         | Y         | Z         |
|------|-----------|-----------|-----------|
| C    | 1.641096  | -0.690756 | -0.149755 |
| C    | 0.294472  | -0.768922 | -0.485380 |
| H    | -0.022824 | -1.681935 | -0.979296 |
| C    | -0.761236 | 0.150344  | -0.222451 |
| C    | -0.610859 | 1.530777  | -0.166792 |
| C    | 0.557724  | 2.188757  | -0.638729 |
| C    | -1.634335 | 2.399618  | 0.315224  |
| N    | 1.500136  | 2.724355  | -1.033735 |
| N    | -2.430248 | 3.130667  | 0.718057  |
| C    | -2.118851 | -0.432775 | -0.076426 |
| C    | -2.297149 | -1.568347 | 0.721019  |
| C    | -3.217795 | 0.111135  | -0.749704 |
| C    | -3.558494 | -2.134200 | 0.863784  |
| H    | -1.445636 | -1.993539 | 1.241310  |
| C    | -4.474856 | -0.466241 | -0.618538 |
| H    | -3.082859 | 0.969215  | -1.398867 |
| C    | -4.648465 | -1.584440 | 0.193546  |
| H    | -3.690235 | -3.004605 | 1.495890  |
| H    | -5.317838 | -0.046819 | -1.155132 |
| H    | -5.630799 | -2.030543 | 0.298765  |
| C    | 2.493931  | -1.730673 | -0.683591 |
| H    | 1.959504  | -2.516862 | -1.209609 |
| C    | 3.846979  | -1.848865 | -0.679947 |
| H    | 4.235929  | -2.714522 | -1.207186 |
| C    | 4.846547  | -0.989284 | -0.121508 |
| H    | 5.872762  | -1.252958 | -0.354978 |
| C    | 4.651570  | 0.078138  | 0.693094  |
| H    | 5.535052  | 0.591787  | 1.057365  |
| C    | 3.401718  | 0.580531  | 1.177620  |
| H    | 3.486753  | 1.346791  | 1.942186  |
| C    | 2.130569  | 0.265736  | 0.816536  |
| H    | 1.355576  | 0.805638  | 1.351275  |

### 1.17 m062x\_parent-VHF-cis\_ch

Gibbs free energy: -802.201230  
Electronic and ZPE: -802.155702

| Atom | X         | Y         | Z         |
|------|-----------|-----------|-----------|
| C    | 1.624446  | -0.697995 | -0.162695 |
| C    | 0.298029  | -0.748279 | -0.538817 |
| H    | -0.017536 | -1.628573 | -1.090823 |
| C    | -0.766216 | 0.172649  | -0.250583 |
| C    | -0.609024 | 1.542256  | -0.184438 |
| C    | 0.582574  | 2.194774  | -0.618159 |
| C    | -1.636539 | 2.420333  | 0.284031  |
| N    | 1.542305  | 2.725431  | -0.972372 |
| N    | -2.433425 | 3.156522  | 0.671400  |
| C    | -2.115373 | -0.424357 | -0.086791 |
| C    | -2.262387 | -1.580970 | 0.686341  |
| C    | -3.236868 | 0.122819  | -0.717584 |
| C    | -3.512876 | -2.163475 | 0.848506  |
| H    | -1.393031 | -2.008553 | 1.174512  |
| C    | -4.483672 | -0.470481 | -0.566662 |
| H    | -3.129974 | 1.000344  | -1.345014 |
| C    | -4.625097 | -1.609334 | 0.220926  |
| H    | -3.619501 | -3.049544 | 1.463553  |
| H    | -5.345040 | -0.043674 | -1.066931 |
| H    | -5.600318 | -2.066964 | 0.342227  |
| C    | 2.487120  | -1.742908 | -0.685634 |
| H    | 1.956575  | -2.535747 | -1.206474 |
| C    | 3.836994  | -1.851127 | -0.676557 |
| H    | 4.235796  | -2.718177 | -1.194866 |
| C    | 4.829836  | -0.972356 | -0.124367 |
| H    | 5.858033  | -1.214353 | -0.373446 |
| C    | 4.623897  | 0.084621  | 0.695092  |
| H    | 5.500747  | 0.617678  | 1.048160  |
| C    | 3.366786  | 0.557802  | 1.202804  |
| H    | 3.445742  | 1.309378  | 1.982588  |
| C    | 2.102970  | 0.234951  | 0.839342  |
| H    | 1.318759  | 0.750980  | 1.384789  |

### 1.18 m062x\_parent-VHF-cis\_dcm

Gibbs free energy: -802.209346  
Electronic and ZPE: -802.163807

| Atom | X         | Y         | Z         |
|------|-----------|-----------|-----------|
| C    | 1.636651  | -0.691076 | -0.155696 |
| C    | 0.295774  | -0.761666 | -0.503470 |
| H    | -0.020929 | -1.665381 | -1.014770 |
| C    | -0.762873 | 0.157081  | -0.231819 |
| C    | -0.611409 | 1.534455  | -0.172360 |
| C    | 0.562460  | 2.192250  | -0.635241 |
| C    | -1.635450 | 2.405050  | 0.308708  |
| N    | 1.507868  | 2.728678  | -1.020782 |
| N    | -2.430323 | 3.137553  | 0.709840  |
| C    | -2.117523 | -0.430883 | -0.079848 |
| C    | -2.285245 | -1.573416 | 0.709940  |
| C    | -3.223980 | 0.114063  | -0.739505 |
| C    | -3.543094 | -2.144785 | 0.859189  |
| H    | -1.427822 | -1.999260 | 1.219982  |
| C    | -4.477692 | -0.468761 | -0.601921 |
| H    | -3.098261 | 0.978265  | -1.382202 |
| C    | -4.640515 | -1.593757 | 0.202524  |
| H    | -3.666536 | -3.020254 | 1.486003  |
| H    | -5.326802 | -0.047222 | -1.127024 |
| H    | -5.620489 | -2.043786 | 0.313035  |
| C    | 2.492496  | -1.732287 | -0.686527 |
| H    | 1.959531  | -2.519114 | -1.213319 |
| C    | 3.844538  | -1.848858 | -0.679245 |
| H    | 4.236239  | -2.714408 | -1.204828 |
| C    | 4.842347  | -0.986094 | -0.119140 |
| H    | 5.869312  | -1.245055 | -0.354932 |
| C    | 4.644002  | 0.077885  | 0.697397  |
| H    | 5.525582  | 0.595310  | 1.061129  |
| C    | 3.391514  | 0.573715  | 1.185768  |
| H    | 3.474192  | 1.335531  | 1.955072  |
| C    | 2.122698  | 0.258564  | 0.821341  |
| H    | 1.344968  | 0.792874  | 1.357886  |

### 1.19 m062x\_parent-VHF-cis\_m

Gibbs free energy: -802.211756  
Electronic and ZPE: -802.166179

| Atom | X         | Y         | Z         |
|------|-----------|-----------|-----------|
| C    | 1.640945  | -0.690738 | -0.150001 |
| C    | 0.294523  | -0.768646 | -0.486058 |
| H    | -0.022748 | -1.681332 | -0.980600 |
| C    | -0.761297 | 0.150588  | -0.222801 |
| C    | -0.610891 | 1.530913  | -0.166993 |
| C    | 0.557857  | 2.188901  | -0.638649 |
| C    | -1.634377 | 2.399806  | 0.315030  |
| N    | 1.500353  | 2.724541  | -1.033359 |
| N    | -2.430243 | 3.130892  | 0.717849  |
| C    | -2.118800 | -0.432713 | -0.076550 |
| C    | -2.296705 | -1.568543 | 0.720616  |
| C    | -3.218025 | 0.111235  | -0.749327 |
| C    | -3.557920 | -2.134606 | 0.863617  |
| H    | -1.444972 | -1.993761 | 1.240529  |
| C    | -4.474962 | -0.466344 | -0.617924 |
| H    | -3.083429 | 0.969539  | -1.398259 |
| C    | -4.648169 | -1.584799 | 0.193877  |
| H    | -3.689352 | -3.005201 | 1.495526  |
| H    | -5.318173 | -0.046845 | -1.154097 |
| H    | -5.630416 | -2.031050 | 0.299290  |
| C    | 2.493891  | -1.730690 | -0.683742 |
| H    | 1.959523  | -2.516879 | -1.209828 |
| C    | 3.846902  | -1.848850 | -0.679927 |
| H    | 4.235950  | -2.714494 | -1.207124 |
| C    | 4.846408  | -0.989193 | -0.121373 |
| H    | 5.872652  | -1.252722 | -0.354890 |
| C    | 4.651306  | 0.078094  | 0.693314  |
| H    | 5.534720  | 0.591847  | 1.057610  |
| C    | 3.401354  | 0.580285  | 1.177927  |
| H    | 3.486295  | 1.346382  | 1.942668  |
| C    | 2.130292  | 0.265509  | 0.816679  |
| H    | 1.355200  | 0.805231  | 1.351460  |

### 1.20 m062x\_parent-VHF-cis\_t

Gibbs free energy: -802.202511  
Electronic and ZPE: -802.156984

| Atom | X         | Y         | Z         |
|------|-----------|-----------|-----------|
| C    | 1.626136  | -0.696527 | -0.162339 |
| C    | 0.297762  | -0.749676 | -0.534833 |
| H    | -0.017874 | -1.633163 | -1.081545 |
| C    | -0.765896 | 0.170633  | -0.248449 |
| C    | -0.609639 | 1.541313  | -0.183062 |
| C    | 0.579202  | 2.194882  | -0.621392 |
| C    | -1.636376 | 2.418227  | 0.288079  |
| N    | 1.536490  | 2.726820  | -0.980635 |
| N    | -2.432403 | 3.153935  | 0.678501  |
| C    | -2.115606 | -0.425354 | -0.086015 |
| C    | -2.264979 | -1.580324 | 0.689178  |
| C    | -3.235387 | 0.121542  | -0.720246 |
| C    | -3.516324 | -2.161569 | 0.849835  |
| H    | -1.397023 | -2.007620 | 1.180043  |
| C    | -4.482989 | -0.470591 | -0.570898 |
| H    | -3.126300 | 0.997385  | -1.349712 |
| C    | -4.626848 | -1.607841 | 0.218744  |
| H    | -3.624906 | -3.046382 | 1.466322  |
| H    | -5.342960 | -0.044480 | -1.074148 |
| H    | -5.602620 | -2.064609 | 0.338788  |
| C    | 2.487929  | -1.740894 | -0.686401 |
| H    | 1.957149  | -2.532502 | -1.208786 |
| C    | 3.838059  | -1.850719 | -0.676860 |
| H    | 4.235823  | -2.717447 | -1.196413 |
| C    | 4.831671  | -0.974834 | -0.122594 |
| H    | 5.859770  | -1.219653 | -0.369167 |
| C    | 4.626714  | 0.083041  | 0.696524  |
| H    | 5.504225  | 0.613482  | 1.051784  |
| C    | 3.370050  | 0.559895  | 1.200720  |
| H    | 3.449340  | 1.312864  | 1.979120  |
| C    | 2.105604  | 0.238662  | 0.836411  |
| H    | 1.322272  | 0.757640  | 1.380242  |

## 1.21 m062x\_3-amino-DHA\_an

Gibbs free energy: -857.564167  
Electronic and ZPE: -857.519343

| Atom | X         | Y         | Z         |
|------|-----------|-----------|-----------|
| C    | 4.536496  | 0.080730  | -0.422174 |
| C    | 4.161010  | 1.039973  | 0.461830  |
| C    | 2.826410  | 1.585267  | 0.593943  |
| C    | 3.674589  | -0.555957 | -1.402608 |
| C    | 1.706469  | 0.875771  | 0.361787  |
| C    | 2.370835  | -0.825861 | -1.232888 |
| C    | 1.735368  | -0.608052 | 0.113716  |
| H    | 5.597761  | -0.135299 | -0.500682 |
| H    | 4.943801  | 1.534073  | 1.029124  |
| H    | 2.759527  | 2.632278  | 0.877236  |
| H    | 4.133557  | -0.812208 | -2.353167 |
| H    | 1.777929  | -1.208644 | -2.057454 |
| C    | 0.319508  | 1.342001  | 0.308206  |
| C    | -0.545844 | 0.301106  | 0.160217  |
| C    | 0.225746  | -1.019902 | 0.248086  |
| H    | 2.334894  | -1.114202 | 0.876044  |
| C    | 0.030268  | -1.649947 | 1.573122  |
| C    | -0.207368 | -1.982527 | -0.780941 |
| N    | -0.102621 | -2.099241 | 2.621710  |
| N    | -0.547904 | -2.711247 | -1.599927 |
| C    | -2.000364 | 0.348508  | -0.012600 |
| C    | -2.829920 | -0.684817 | 0.450421  |
| C    | -2.599903 | 1.424128  | -0.688725 |
| C    | -4.206688 | -0.630295 | 0.268225  |
| H    | -2.409730 | -1.539337 | 0.969529  |
| C    | -3.977029 | 1.476082  | -0.866763 |
| H    | -1.981010 | 2.205765  | -1.114055 |
| C    | -4.788712 | 0.452855  | -0.384255 |
| H    | -4.825893 | -1.438608 | 0.640210  |
| H    | -4.415059 | 2.314336  | -1.396656 |
| H    | -5.862636 | 0.493972  | -0.524181 |
| N    | 0.015351  | 2.674823  | 0.357462  |
| H    | -0.915471 | 2.919060  | 0.667545  |
| H    | 0.723327  | 3.284092  | 0.740180  |

## 1.22 m062x\_3-amino-DHA\_ch

Gibbs free energy: -857.554273  
Electronic and ZPE: -857.509400

| Atom | X         | Y         | Z         |
|------|-----------|-----------|-----------|
| C    | 4.536468  | 0.099288  | -0.414264 |
| C    | 4.153891  | 1.057343  | 0.466900  |
| C    | 2.815509  | 1.592909  | 0.596587  |
| C    | 3.680550  | -0.544751 | -1.394585 |
| C    | 1.700023  | 0.876856  | 0.364019  |
| C    | 2.378608  | -0.822394 | -1.227724 |
| C    | 1.735656  | -0.607118 | 0.115719  |
| H    | 5.599000  | -0.112940 | -0.487659 |
| H    | 4.932882  | 1.554794  | 1.036884  |
| H    | 2.740716  | 2.641009  | 0.875366  |
| H    | 4.143139  | -0.801384 | -2.343326 |
| H    | 1.790217  | -1.214390 | -2.051120 |
| C    | 0.311721  | 1.334034  | 0.310947  |
| C    | -0.547448 | 0.292392  | 0.159260  |
| C    | 0.227336  | -1.027087 | 0.242586  |
| H    | 2.334306  | -1.109383 | 0.881520  |
| C    | 0.030578  | -1.662386 | 1.564350  |
| C    | -0.197174 | -1.984942 | -0.793738 |
| N    | -0.099568 | -2.118811 | 2.610152  |
| N    | -0.522444 | -2.712206 | -1.620095 |
| C    | -2.002165 | 0.342844  | -0.013087 |
| C    | -2.835759 | -0.675221 | 0.471970  |
| C    | -2.592719 | 1.408967  | -0.710225 |
| C    | -4.211553 | -0.613289 | 0.290700  |
| H    | -2.417865 | -1.521165 | 1.006401  |
| C    | -3.969197 | 1.467444  | -0.887624 |
| H    | -1.964446 | 2.172714  | -1.154862 |
| C    | -4.786056 | 0.460449  | -0.382319 |
| H    | -4.836187 | -1.409977 | 0.678115  |
| H    | -4.402727 | 2.295518  | -1.437094 |
| H    | -5.859820 | 0.505396  | -0.522862 |
| N    | -0.004434 | 2.669139  | 0.367362  |
| H    | -0.938975 | 2.890374  | 0.684076  |
| H    | 0.695274  | 3.270564  | 0.775805  |

### 1.23 m062x\_3-amino-DHA\_dcm

Gibbs free energy: -857.561851

Electronic and ZPE: -857.517044

| Atom | X         | Y         | Z         |
|------|-----------|-----------|-----------|
| C    | 4.535652  | 0.085478  | -0.421950 |
| C    | 4.159243  | 1.043011  | 0.463302  |
| C    | 2.823932  | 1.586100  | 0.596355  |
| C    | 3.674479  | -0.551070 | -1.402978 |
| C    | 1.704897  | 0.875557  | 0.363269  |
| C    | 2.371221  | -0.822912 | -1.233534 |
| C    | 1.735289  | -0.607959 | 0.113289  |
| H    | 5.597130  | -0.129685 | -0.500319 |
| H    | 4.941648  | 1.536777  | 1.031509  |
| H    | 2.755439  | 2.633002  | 0.880033  |
| H    | 4.133601  | -0.805612 | -2.353930 |
| H    | 1.778538  | -1.205889 | -2.058150 |
| C    | 0.317658  | 1.339767  | 0.309767  |
| C    | -0.546252 | 0.298867  | 0.160096  |
| C    | 0.226091  | -1.021781 | 0.246671  |
| H    | 2.335461  | -1.114198 | 0.875091  |
| C    | 0.031237  | -1.652721 | 1.571281  |
| C    | -0.205020 | -1.984157 | -0.783242 |
| N    | -0.099973 | -2.103480 | 2.619447  |
| N    | -0.541370 | -2.714070 | -1.602857 |
| C    | -2.000804 | 0.347184  | -0.012860 |
| C    | -2.831564 | -0.682043 | 0.455934  |
| C    | -2.597721 | 1.420362  | -0.694703 |
| C    | -4.208071 | -0.625500 | 0.273865  |
| H    | -2.412145 | -1.534423 | 0.979100  |
| C    | -3.974646 | 1.474094  | -0.872804 |
| H    | -1.976142 | 2.197271  | -1.125002 |
| C    | -4.787892 | 0.455223  | -0.384222 |
| H    | -4.828806 | -1.430763 | 0.649811  |
| H    | -4.411350 | 2.309620  | -1.408137 |
| H    | -5.861742 | 0.497378  | -0.524558 |
| N    | 0.010707  | 2.673120  | 0.361407  |
| H    | -0.920750 | 2.911924  | 0.673948  |
| H    | 0.717185  | 3.280618  | 0.749397  |

### 1.24 m062x\_3-amino-DHA\_m

Gibbs free energy: -857.564089

Electronic and ZPE: -857.519266

| Atom | X         | Y         | Z         |
|------|-----------|-----------|-----------|
| C    | 4.536458  | 0.080908  | -0.422175 |
| C    | 4.160943  | 1.040074  | 0.461895  |
| C    | 2.826318  | 1.585289  | 0.594054  |
| C    | 3.674574  | -0.555752 | -1.402641 |
| C    | 1.706410  | 0.875760  | 0.361852  |
| C    | 2.370838  | -0.825727 | -1.232931 |
| C    | 1.735365  | -0.608048 | 0.113690  |
| H    | 5.597731  | -0.135088 | -0.500688 |
| H    | 4.943723  | 1.534151  | 1.029226  |
| H    | 2.759381  | 2.632292  | 0.877375  |
| H    | 4.133543  | -0.811918 | -2.353223 |
| H    | 1.777933  | -1.208489 | -2.057506 |
| C    | 0.319439  | 1.341918  | 0.308271  |
| C    | -0.545861 | 0.301022  | 0.160211  |
| C    | 0.225760  | -1.019972 | 0.248030  |
| H    | 2.334922  | -1.114212 | 0.875985  |
| C    | 0.030314  | -1.650051 | 1.573052  |
| C    | -0.207276 | -1.982599 | -0.781022 |
| N    | -0.102506 | -2.099397 | 2.621626  |
| N    | -0.547647 | -2.711380 | -1.600020 |
| C    | -2.000382 | 0.348457  | -0.012612 |
| C    | -2.829986 | -0.684710 | 0.450631  |
| C    | -2.599822 | 1.423985  | -0.688957 |
| C    | -4.206746 | -0.630111 | 0.268443  |
| H    | -2.409828 | -1.539150 | 0.969896  |
| C    | -3.976941 | 1.476007  | -0.866996 |
| H    | -1.980827 | 2.205444  | -1.114475 |
| C    | -4.788686 | 0.452947  | -0.384253 |
| H    | -4.826009 | -1.438306 | 0.640581  |
| H    | -4.414919 | 2.314159  | -1.397096 |
| H    | -5.862607 | 0.494105  | -0.524194 |
| N    | 0.015181  | 2.674756  | 0.357619  |
| H    | -0.915664 | 2.918803  | 0.667783  |
| H    | 0.723104  | 3.283967  | 0.740518  |

## 1.25 m062x\_3-amino-DHA\_t

Gibbs free energy: -857.555494

Electronic and ZPE: -857.510634

| Atom | X         | Y         | Z         |
|------|-----------|-----------|-----------|
| C    | 4.535995  | 0.097107  | -0.416227 |
| C    | 4.154746  | 1.054594  | 0.466281  |
| C    | 2.816949  | 1.591441  | 0.597110  |
| C    | 3.678932  | -0.545059 | -1.396834 |
| C    | 1.700808  | 0.876486  | 0.364176  |
| C    | 2.376802  | -0.821765 | -1.229352 |
| C    | 1.735516  | -0.607290 | 0.115003  |
| H    | 5.598320  | -0.115652 | -0.490828 |
| H    | 4.934512  | 1.551024  | 1.036052  |
| H    | 2.743300  | 2.639212  | 0.877255  |
| H    | 4.140674  | -0.800767 | -2.346231 |
| H    | 1.787371  | -1.211639 | -2.053021 |
| C    | 0.312701  | 1.334863  | 0.311076  |
| C    | -0.547257 | 0.293422  | 0.159474  |
| C    | 0.227108  | -1.026255 | 0.243291  |
| H    | 2.334771  | -1.110513 | 0.879670  |
| C    | 0.031045  | -1.660672 | 1.565679  |
| C    | -0.198575 | -1.985172 | -0.791660 |
| N    | -0.098749 | -2.116118 | 2.611960  |
| N    | -0.525519 | -2.713391 | -1.616517 |
| C    | -2.001923 | 0.343589  | -0.013071 |
| C    | -2.835105 | -0.676263 | 0.469286  |
| C    | -2.593384 | 1.410885  | -0.707794 |
| C    | -4.210992 | -0.615149 | 0.287826  |
| H    | -2.417035 | -1.523321 | 1.001856  |
| C    | -3.969913 | 1.468634  | -0.885405 |
| H    | -1.966078 | 2.176675  | -1.150173 |
| C    | -4.786258 | 0.459754  | -0.382807 |
| H    | -4.835026 | -1.413258 | 0.673296  |
| H    | -4.403889 | 2.297877  | -1.432738 |
| H    | -5.860021 | 0.504253  | -0.523441 |
| N    | -0.001923 | 2.669699  | 0.366952  |
| H    | -0.935829 | 2.893774  | 0.683464  |
| H    | 0.699096  | 3.272113  | 0.771760  |

## 1.26 m062x\_3-amino-TS-WH\_an

Gibbs free energy: -857.518461

Electronic and ZPE: -857.472618

| Atom | X         | Y         | Z         |
|------|-----------|-----------|-----------|
| C    | 4.623288  | -0.460782 | 0.230716  |
| C    | 3.840166  | -1.522966 | 0.600298  |
| C    | 2.448907  | -1.707634 | 0.416016  |
| C    | 1.552875  | -0.943580 | -0.296369 |
| C    | 1.822909  | 0.225045  | -1.066065 |
| C    | 3.021971  | 0.970170  | -1.092129 |
| C    | 4.226912  | 0.688218  | -0.494036 |
| C    | 0.103404  | -1.246866 | -0.221402 |
| C    | -0.701819 | -0.158968 | -0.080015 |
| C    | -0.019249 | 1.153726  | 0.112739  |
| C    | -0.444736 | 2.271979  | -0.637325 |
| N    | -0.779060 | 3.162004  | -1.299415 |
| H    | 5.667042  | -0.499122 | 0.521373  |
| H    | 4.336729  | -2.313396 | 1.153958  |
| H    | 2.025168  | -2.575056 | 0.912284  |
| H    | 1.111996  | 0.441765  | -1.853262 |
| H    | 2.986608  | 1.872343  | -1.694458 |
| C    | -2.176140 | -0.233579 | 0.010019  |
| C    | -2.914026 | -1.044908 | -0.863655 |
| C    | -2.869734 | 0.544323  | 0.945665  |
| C    | -4.301068 | -1.096075 | -0.784534 |
| H    | -2.398325 | -1.614376 | -1.630598 |
| C    | -4.256476 | 0.488912  | 1.027200  |
| H    | -2.314107 | 1.193449  | 1.614819  |
| C    | -4.977353 | -0.334311 | 0.165468  |
| H    | -4.855146 | -1.722593 | -1.474378 |
| H    | -4.775684 | 1.092233  | 1.763308  |
| H    | -6.058906 | -0.373219 | 0.225847  |
| H    | 5.011915  | 1.418614  | -0.664580 |
| C    | 0.700148  | 1.408470  | 1.297026  |
| N    | 1.366715  | 1.556351  | 2.234869  |
| N    | -0.265494 | -2.568949 | -0.056004 |
| H    | -1.258231 | -2.739584 | 0.022368  |
| H    | 0.185948  | -3.233949 | -0.670530 |

## 1.27 m062x\_3-amino-TS-WH\_ch

Gibbs free energy: -857.495565

Electronic and ZPE: -857.449580

| Atom | X         | Y         | Z         |
|------|-----------|-----------|-----------|
| C    | 4.245698  | -0.981710 | 1.063169  |
| C    | 3.537913  | -1.982062 | 0.412716  |
| C    | 2.360473  | -1.880278 | -0.335077 |
| C    | 1.644114  | -0.741282 | -0.688657 |
| C    | 2.166668  | 0.603108  | -0.649146 |
| C    | 3.182364  | 1.091403  | 0.168337  |
| C    | 4.049851  | 0.398782  | 1.003402  |
| C    | 0.240166  | -0.877529 | -1.012208 |
| C    | -0.602353 | 0.065735  | -0.451328 |
| C    | -0.112774 | 1.389070  | -0.064391 |
| C    | 0.075000  | 2.397012  | -1.039871 |
| N    | 0.268403  | 3.187046  | -1.863847 |
| H    | 5.068604  | -1.315810 | 1.687241  |
| H    | 3.888746  | -2.994658 | 0.583399  |
| H    | 1.897960  | -2.826575 | -0.595369 |
| H    | 1.881042  | 1.248139  | -1.466814 |
| H    | 3.329979  | 2.167060  | 0.115003  |
| C    | -2.003465 | -0.278646 | -0.099829 |
| C    | -3.014320 | 0.673355  | -0.281035 |
| C    | -2.338400 | -1.516954 | 0.463980  |
| C    | -4.328264 | 0.385810  | 0.066698  |
| H    | -2.763442 | 1.641556  | -0.701226 |
| C    | -3.650672 | -1.798509 | 0.821954  |
| H    | -1.559763 | -2.250166 | 0.645148  |
| C    | -4.650316 | -0.850815 | 0.617886  |
| H    | -5.099876 | 1.131600  | -0.085948 |
| H    | -3.891830 | -2.754943 | 1.271919  |
| H    | -5.674171 | -1.071891 | 0.897372  |
| H    | 4.731798  | 1.004205  | 1.591173  |
| C    | -0.389321 | 1.845243  | 1.254469  |
| N    | -0.558533 | 2.181210  | 2.347421  |
| N    | -0.198383 | -2.100065 | -1.534967 |
| H    | -1.189898 | -2.117799 | -1.737135 |
| H    | 0.326282  | -2.388455 | -2.351424 |

## 1.28 m062x\_3-amino-TS-WH\_dcm

Gibbs free energy: -857.512440

Electronic and ZPE: -857.465307

| Atom | X         | Y         | Z         |
|------|-----------|-----------|-----------|
| C    | 4.582674  | -0.636467 | 0.221380  |
| C    | 3.732449  | -1.715584 | 0.265643  |
| C    | 2.356300  | -1.773512 | -0.037181 |
| C    | 1.534244  | -0.798822 | -0.566583 |
| C    | 1.901152  | 0.506966  | -0.982530 |
| C    | 3.127481  | 1.162403  | -0.771994 |
| C    | 4.285553  | 0.673012  | -0.206887 |
| C    | 0.073881  | -1.051205 | -0.639760 |
| C    | -0.714478 | -0.053303 | -0.171403 |
| C    | -0.037580 | 1.154421  | 0.394502  |
| C    | -0.331542 | 2.443025  | -0.086764 |
| N    | -0.547289 | 3.488971  | -0.540033 |
| H    | 5.600330  | -0.806156 | 0.554626  |
| H    | 4.160017  | -2.644105 | 0.630083  |
| H    | 1.869224  | -2.717264 | 0.187599  |
| H    | 1.213854  | 0.993549  | -1.662451 |
| H    | 3.165038  | 2.188656  | -1.123230 |
| C    | -2.191086 | -0.194439 | -0.061920 |
| C    | -3.044873 | 0.731746  | -0.672308 |
| C    | -2.750977 | -1.243065 | 0.675831  |
| C    | -4.424479 | 0.604273  | -0.553921 |
| H    | -2.626314 | 1.551441  | -1.246165 |
| C    | -4.132321 | -1.368812 | 0.794800  |
| H    | -2.097768 | -1.953544 | 1.173151  |
| C    | -4.972350 | -0.446338 | 0.178693  |
| H    | -5.073535 | 1.326772  | -1.035842 |
| H    | -4.550201 | -2.184080 | 1.374725  |
| H    | -6.048157 | -0.542593 | 0.271176  |
| H    | 5.107919  | 1.378782  | -0.144263 |
| C    | 0.636519  | 1.045628  | 1.623011  |
| N    | 1.262867  | 0.893916  | 2.588804  |
| N    | -0.335646 | -2.333690 | -0.981667 |
| H    | -1.335036 | -2.434381 | -1.107287 |
| H    | 0.171699  | -2.741021 | -1.757513 |

### 1.29 m062x\_3-amino-TS-WH\_m

Gibbs free energy: -857.518327

Electronic and ZPE: -857.472482

| Atom | X         | Y         | Z         |
|------|-----------|-----------|-----------|
| C    | 4.623183  | -0.460471 | 0.230710  |
| C    | 3.840178  | -1.522888 | 0.599988  |
| C    | 2.449012  | -1.707784 | 0.415572  |
| C    | 1.552800  | -0.943535 | -0.296466 |
| C    | 1.822820  | 0.224938  | -1.066345 |
| C    | 3.022012  | 0.969757  | -1.093063 |
| C    | 4.226840  | 0.688209  | -0.494481 |
| C    | 0.103363  | -1.246707 | -0.221113 |
| C    | -0.701835 | -0.158807 | -0.079732 |
| C    | -0.019386 | 1.153864  | 0.113116  |
| C    | -0.445279 | 2.272360  | -0.636372 |
| N    | -0.779835 | 3.162604  | -1.298039 |
| H    | 5.666818  | -0.498503 | 0.521840  |
| H    | 4.336808  | -2.313232 | 1.153722  |
| H    | 2.025283  | -2.575257 | 0.911756  |
| H    | 1.111532  | 0.441848  | -1.853144 |
| H    | 2.986779  | 1.871561  | -1.695948 |
| C    | -2.176178 | -0.233534 | 0.010041  |
| C    | -2.913858 | -1.044568 | -0.864063 |
| C    | -2.869904 | 0.543901  | 0.945949  |
| C    | -4.300904 | -1.095810 | -0.785194 |
| H    | -2.397954 | -1.613777 | -1.631065 |
| C    | -4.256651 | 0.488401  | 1.027240  |
| H    | -2.314368 | 1.192733  | 1.615460  |
| C    | -4.977349 | -0.334446 | 0.165014  |
| H    | -4.854870 | -1.722044 | -1.475386 |
| H    | -4.776001 | 1.091390  | 1.763516  |
| H    | -6.058914 | -0.373375 | 0.225172  |
| H    | 5.011806  | 1.418622  | -0.665146 |
| C    | 0.700906  | 1.408149  | 1.296976  |
| N    | 1.368115  | 1.555700  | 2.234405  |
| N    | -0.265617 | -2.568818 | -0.055102 |
| H    | -1.258367 | -2.738815 | 0.024692  |
| H    | 0.184188  | -3.233716 | -0.670964 |

### 1.30 m062x\_3-amino-TS-WH\_t

Gibbs free energy: -857.497461

Electronic and ZPE: -857.451502

| Atom | X         | Y         | Z         |
|------|-----------|-----------|-----------|
| C    | 4.291179  | -0.962512 | 1.019400  |
| C    | 3.551638  | -1.974908 | 0.426928  |
| C    | 2.355400  | -1.883677 | -0.292849 |
| C    | 1.644263  | -0.750351 | -0.671788 |
| C    | 2.168736  | 0.590150  | -0.672187 |
| C    | 3.213636  | 1.093261  | 0.099196  |
| C    | 4.106343  | 0.417823  | 0.920665  |
| C    | 0.234097  | -0.891082 | -0.981775 |
| C    | -0.606213 | 0.056688  | -0.431345 |
| C    | -0.114570 | 1.380908  | -0.035894 |
| C    | 0.061297  | 2.397582  | -1.002324 |
| N    | 0.245492  | 3.195134  | -1.821949 |
| H    | 5.130775  | -1.284891 | 1.627151  |
| H    | 3.895171  | -2.985554 | 0.621849  |
| H    | 1.876605  | -2.832435 | -0.511472 |
| H    | 1.846712  | 1.226008  | -1.483336 |
| H    | 3.362075  | 2.166807  | 0.016436  |
| C    | -2.015591 | -0.276281 | -0.099658 |
| C    | -3.018235 | 0.678785  | -0.308146 |
| C    | -2.366515 | -1.506082 | 0.472612  |
| C    | -4.339583 | 0.401457  | 0.019627  |
| H    | -2.755204 | 1.641354  | -0.733843 |
| C    | -3.686328 | -1.777261 | 0.811418  |
| H    | -1.594845 | -2.240962 | 0.675821  |
| C    | -4.677558 | -0.827358 | 0.579158  |
| H    | -5.104710 | 1.149173  | -0.154895 |
| H    | -3.939873 | -2.727226 | 1.268246  |
| H    | -5.707214 | -1.040180 | 0.843320  |
| H    | 4.813072  | 1.034574  | 1.465724  |
| C    | -0.379198 | 1.820476  | 1.289433  |
| N    | -0.542108 | 2.141495  | 2.388356  |
| N    | -0.201731 | -2.118878 | -1.493391 |
| H    | -1.193584 | -2.142816 | -1.693243 |
| H    | 0.322668  | -2.413806 | -2.307700 |



### 1.31 m062x\_3-amino-TS-ZI\_an

Gibbs free energy: -857.518464  
Electronic and ZPE: -857.472618

| Atom | X         | Y         | Z         |
|------|-----------|-----------|-----------|
| C    | -4.623085 | -0.460652 | 0.230780  |
| C    | -3.840007 | -1.522883 | 0.600349  |
| C    | -2.448807 | -1.707732 | 0.415867  |
| C    | -4.226785 | 0.688098  | -0.494390 |
| C    | -1.552742 | -0.943656 | -0.296458 |
| C    | -3.021872 | 0.969907  | -1.092634 |
| C    | -1.822735 | 0.224944  | -1.066214 |
| H    | -5.666775 | -0.498820 | 0.521690  |
| H    | -4.336571 | -2.313205 | 1.154162  |
| H    | -2.025108 | -2.575247 | 0.912006  |
| H    | -2.986583 | 1.871874  | -1.695271 |
| C    | -0.103258 | -1.246857 | -0.221420 |
| C    | 0.701827  | -0.158888 | -0.079916 |
| C    | 0.018988  | 1.153631  | 0.113056  |
| H    | -1.111636 | 0.441756  | -1.853228 |
| C    | 0.443961  | 2.272004  | -0.637104 |
| C    | -0.700055 | 1.408094  | 1.297618  |
| N    | 0.777814  | 3.162105  | -1.299334 |
| N    | -1.366307 | 1.555722  | 2.235726  |
| H    | -5.011819 | 1.418416  | -0.665128 |
| C    | 2.176171  | -0.233377 | 0.009942  |
| C    | 2.914009  | -1.044056 | -0.864358 |
| C    | 2.869757  | 0.543787  | 0.946204  |
| C    | 4.301068  | -1.095175 | -0.785398 |
| H    | 2.398228  | -1.613116 | -1.631551 |
| C    | 4.256510  | 0.488442  | 1.027556  |
| H    | 2.314102  | 1.192225  | 1.616003  |
| C    | 4.977370  | -0.334035 | 0.165088  |
| H    | 4.855138  | -1.721172 | -1.475721 |
| H    | 4.775746  | 1.091200  | 1.764104  |
| H    | 6.058933  | -0.372885 | 0.225326  |
| N    | 0.265789  | -2.568895 | -0.055798 |
| H    | -0.185185 | -3.233920 | -0.670657 |
| H    | 1.258582  | -2.739212 | 0.022692  |

### 1.32 m062x\_3-amino-TS-ZI\_ch

Gibbs free energy: -857.501626  
Electronic and ZPE: -857.455586

| Atom | X         | Y         | Z         |
|------|-----------|-----------|-----------|
| C    | -4.636271 | -0.464345 | 0.160092  |
| C    | -3.837935 | -1.498611 | 0.588140  |
| C    | -2.448406 | -1.674374 | 0.437817  |
| C    | -4.239941 | 0.659171  | -0.593019 |
| C    | -1.539786 | -0.916041 | -0.280338 |
| C    | -3.020698 | 0.942179  | -1.168114 |
| C    | -1.813582 | 0.220166  | -1.086068 |
| H    | -5.683128 | -0.506949 | 0.438782  |
| H    | -4.334031 | -2.269242 | 1.170814  |
| H    | -2.018773 | -2.515830 | 0.971950  |
| H    | -2.979867 | 1.831446  | -1.789001 |
| C    | -0.096865 | -1.220707 | -0.184364 |
| C    | 0.716286  | -0.136790 | -0.042193 |
| C    | 0.048163  | 1.166499  | 0.183889  |
| H    | -1.059622 | 0.466612  | -1.822679 |
| C    | 0.486509  | 2.311106  | -0.520986 |
| C    | -0.774541 | 1.359815  | 1.312485  |
| N    | 0.821222  | 3.221194  | -1.152982 |
| N    | -1.517005 | 1.452878  | 2.197826  |
| H    | -5.027879 | 1.376736  | -0.802803 |
| C    | 2.191184  | -0.226730 | 0.010462  |
| C    | 2.897848  | -1.041484 | -0.884658 |
| C    | 2.912131  | 0.538179  | 0.933896  |
| C    | 4.284695  | -1.106885 | -0.840230 |
| H    | 2.354633  | -1.598356 | -1.642033 |
| C    | 4.299090  | 0.467446  | 0.981501  |
| H    | 2.375967  | 1.189363  | 1.616205  |
| C    | 4.989594  | -0.357226 | 0.098248  |
| H    | 4.817365  | -1.731406 | -1.548636 |
| H    | 4.842303  | 1.062922  | 1.706359  |
| H    | 6.072040  | -0.405437 | 0.130992  |
| N    | 0.266990  | -2.548691 | 0.015645  |
| H    | -0.119868 | -3.209504 | -0.646240 |
| H    | 1.257547  | -2.696232 | 0.153498  |

### 1.33 m062x\_3-amino-TS-ZI\_dcm

Gibbs free energy: -857.514548

Electronic and ZPE: -857.468625

| Atom | X         | Y         | Z         |
|------|-----------|-----------|-----------|
| C    | -4.627369 | -0.465588 | 0.214028  |
| C    | -3.839312 | -1.521603 | 0.594817  |
| C    | -2.448113 | -1.701712 | 0.418757  |
| C    | -4.232535 | 0.679557  | -0.514602 |
| C    | -1.549998 | -0.936164 | -0.293081 |
| C    | -3.024796 | 0.963061  | -1.108417 |
| C    | -1.823425 | 0.224417  | -1.070757 |
| H    | -5.671656 | -0.506619 | 0.502427  |
| H    | -4.334784 | -2.309347 | 1.153572  |
| H    | -2.021609 | -2.563332 | 0.922604  |
| H    | -2.989403 | 1.863196  | -1.713771 |
| C    | -0.101513 | -1.238328 | -0.212916 |
| C    | 0.705739  | -0.151876 | -0.071345 |
| C    | 0.028390  | 1.159657  | 0.130812  |
| H    | -1.101068 | 0.451568  | -1.844363 |
| C    | 0.453969  | 2.283474  | -0.610867 |
| C    | -0.715448 | 1.399223  | 1.302942  |
| N    | 0.785182  | 3.177991  | -1.268198 |
| N    | -1.399495 | 1.534631  | 2.229873  |
| H    | -5.018723 | 1.407211  | -0.691751 |
| C    | 2.180393  | -0.231917 | 0.009906  |
| C    | 2.910337  | -1.041773 | -0.871496 |
| C    | 2.880848  | 0.539345  | 0.945302  |
| C    | 4.297413  | -1.097227 | -0.800930 |
| H    | 2.387677  | -1.605649 | -1.637951 |
| C    | 4.267664  | 0.479172  | 1.018635  |
| H    | 2.330090  | 1.187167  | 1.619541  |
| C    | 4.980912  | -0.341802 | 0.148880  |
| H    | 4.846168  | -1.721039 | -1.497494 |
| H    | 4.792943  | 1.078034  | 1.754013  |
| H    | 6.062755  | -0.383387 | 0.202299  |
| N    | 0.266659  | -2.561969 | -0.038430 |
| H    | -0.166966 | -3.226135 | -0.666693 |
| H    | 1.259224  | -2.725747 | 0.056857  |

### 1.34 m062x\_3-amino-TS-ZI\_m

Gibbs free energy: -857.518330

Electronic and ZPE: -857.472482

| Atom | X         | Y         | Z         |
|------|-----------|-----------|-----------|
| C    | -4.623252 | -0.460880 | 0.230238  |
| C    | -3.839990 | -1.522919 | 0.600114  |
| C    | -2.448786 | -1.707572 | 0.415912  |
| C    | -4.227019 | 0.687798  | -0.494971 |
| C    | -1.552663 | -0.943395 | -0.296357 |
| C    | -3.022024 | 0.969688  | -1.093089 |
| C    | -1.822812 | 0.224942  | -1.066350 |
| H    | -5.666959 | -0.499174 | 0.521073  |
| H    | -4.336505 | -2.313195 | 1.154048  |
| H    | -2.024976 | -2.574901 | 0.912277  |
| H    | -2.986746 | 1.871623  | -1.695775 |
| C    | -0.103205 | -1.246540 | -0.221149 |
| C    | 0.701961  | -0.158630 | -0.079651 |
| C    | 0.019344  | 1.153877  | 0.113642  |
| H    | -1.111333 | 0.442155  | -1.852904 |
| C    | 0.444294  | 2.272411  | -0.636283 |
| C    | -0.700496 | 1.407860  | 1.297811  |
| N    | 0.778010  | 3.162644  | -1.298398 |
| N    | -1.367305 | 1.555111  | 2.235579  |
| H    | -5.012092 | 1.418042  | -0.665858 |
| C    | 2.176317  | -0.233335 | 0.009931  |
| C    | 2.913891  | -1.043971 | -0.864622 |
| C    | 2.870131  | 0.543597  | 0.946194  |
| C    | 4.300951  | -1.095250 | -0.785932 |
| H    | 2.397884  | -1.612831 | -1.631815 |
| C    | 4.256886  | 0.488074  | 1.027290  |
| H    | 2.314639  | 1.192004  | 1.616151  |
| C    | 4.977492  | -0.334334 | 0.164560  |
| H    | 4.854846  | -1.721156 | -1.476479 |
| H    | 4.776322  | 1.090679  | 1.763820  |
| H    | 6.059065  | -0.373284 | 0.224576  |
| N    | 0.265821  | -2.568631 | -0.055210 |
| H    | -0.184557 | -3.233643 | -0.670523 |
| H    | 1.258611  | -2.738716 | 0.023878  |

### 1.35 m062x\_3-amino-TS-ZI\_t

Gibbs free energy: -857.503638

Electronic and ZPE: -857.457641

| Atom | X         | Y         | Z         |
|------|-----------|-----------|-----------|
| C    | -4.635210 | -0.465262 | 0.167920  |
| C    | -3.837731 | -1.502080 | 0.589676  |
| C    | -2.447790 | -1.677761 | 0.435471  |
| C    | -4.239928 | 0.661283  | -0.582310 |
| C    | -1.541313 | -0.918407 | -0.282377 |
| C    | -3.022458 | 0.944700  | -1.160311 |
| C    | -1.815760 | 0.221022  | -1.084226 |
| H    | -5.681643 | -0.508072 | 0.448191  |
| H    | -4.333166 | -2.275211 | 1.169419  |
| H    | -2.018029 | -2.521814 | 0.965417  |
| H    | -2.983030 | 1.835267  | -1.779409 |
| C    | -0.097339 | -1.222560 | -0.189158 |
| C    | 0.714996  | -0.138497 | -0.046982 |
| C    | 0.045669  | 1.166127  | 0.176751  |
| H    | -1.065943 | 0.465420  | -1.825717 |
| C    | 0.480757  | 2.308149  | -0.533500 |
| C    | -0.764863 | 1.364577  | 1.312862  |
| N    | 0.813615  | 3.216479  | -1.169329 |
| N    | -1.498062 | 1.462026  | 2.205609  |
| H    | -5.028063 | 1.379810  | -0.787651 |
| C    | 2.189904  | -0.227336 | 0.009961  |
| C    | 2.899929  | -1.040671 | -0.883871 |
| C    | 2.907879  | 0.537582  | 0.935900  |
| C    | 4.286843  | -1.104768 | -0.835654 |
| H    | 2.359677  | -1.597836 | -1.643127 |
| C    | 4.294839  | 0.468171  | 0.987286  |
| H    | 2.369616  | 1.187773  | 1.617550  |
| C    | 4.988653  | -0.355197 | 0.105235  |
| H    | 4.821865  | -1.728505 | -1.542970 |
| H    | 4.835459  | 1.063470  | 1.714246  |
| H    | 6.071040  | -0.402480 | 0.140937  |
| N    | 0.267077  | -2.550091 | 0.006563  |
| H    | -0.126712 | -3.211114 | -0.650958 |
| H    | 1.258063  | -2.700038 | 0.138140  |

### 1.36 m062x\_3-amino-VHF-cis\_an

Gibbs free energy: -857.543549

Electronic and ZPE: -857.496476

| Atom | X         | Y         | Z         |
|------|-----------|-----------|-----------|
| C    | 1.544103  | -0.713464 | 0.021449  |
| C    | 2.459110  | -1.833756 | 0.285163  |
| C    | 3.805176  | -1.811997 | 0.284270  |
| C    | 4.674521  | -0.689259 | -0.007558 |
| C    | 4.361967  | 0.381514  | -0.767268 |
| C    | 3.095970  | 0.644883  | -1.421798 |
| C    | 1.874535  | 0.182048  | -1.089250 |
| C    | -0.501379 | 1.602844  | 0.297334  |
| C    | -0.729370 | 0.257289  | 0.325809  |
| C    | 0.337120  | -0.696740 | 0.659886  |
| C    | 0.717820  | 2.195228  | 0.758271  |
| C    | -1.463094 | 2.543249  | -0.199422 |
| N    | 1.671683  | 2.717053  | 1.135482  |
| N    | -2.199010 | 3.328785  | -0.606859 |
| C    | -2.068790 | -0.302304 | 0.046416  |
| C    | -2.170070 | -1.440454 | -0.763955 |
| C    | -3.227039 | 0.269769  | 0.582021  |
| C    | -3.415583 | -1.971922 | -1.065104 |
| C    | -4.471573 | -0.278685 | 0.294037  |
| H    | -3.154457 | 1.122831  | 1.247190  |
| C    | -4.567787 | -1.391628 | -0.536104 |
| H    | -5.364264 | 0.160903  | 0.722837  |
| N    | -0.042703 | -1.697868 | 1.566775  |
| H    | 1.982394  | -2.787430 | 0.504755  |
| H    | 4.308119  | -2.738849 | 0.545814  |
| H    | 5.695792  | -0.772552 | 0.351185  |
| H    | 5.153310  | 1.096003  | -0.973967 |
| H    | 3.139196  | 1.337390  | -2.257373 |
| H    | 1.040854  | 0.526012  | -1.697080 |
| H    | -1.268398 | -1.894808 | -1.161036 |
| H    | -3.489349 | -2.842555 | -1.705885 |
| H    | -5.539545 | -1.814648 | -0.763308 |
| H    | -0.775396 | -1.414350 | 2.204636  |
| H    | 0.728117  | -2.093433 | 2.089251  |

### 1.37 m062x\_3-amino-VHF-cis\_ch

Gibbs free energy: -857.532374  
Electronic and ZPE: -857.485464

| Atom | X         | Y         | Z         |
|------|-----------|-----------|-----------|
| C    | 1.543045  | -0.712364 | 0.003058  |
| C    | 2.447214  | -1.842011 | 0.260218  |
| C    | 3.792848  | -1.829710 | 0.273248  |
| C    | 4.670951  | -0.706971 | 0.012974  |
| C    | 4.372626  | 0.379696  | -0.727858 |
| C    | 3.118277  | 0.660898  | -1.395481 |
| C    | 1.891315  | 0.198834  | -1.087992 |
| C    | -0.500011 | 1.609279  | 0.288882  |
| C    | -0.731159 | 0.264893  | 0.313547  |
| C    | 0.334783  | -0.694449 | 0.635849  |
| C    | 0.726028  | 2.196086  | 0.742332  |
| C    | -1.464917 | 2.556349  | -0.192066 |
| N    | 1.686026  | 2.709931  | 1.114029  |
| N    | -2.206588 | 3.344786  | -0.582419 |
| C    | -2.073097 | -0.297565 | 0.043168  |
| C    | -2.174492 | -1.458362 | -0.734204 |
| C    | -3.233968 | 0.288743  | 0.557072  |
| C    | -3.418858 | -1.997168 | -1.025004 |
| C    | -4.477619 | -0.264831 | 0.278086  |
| H    | -3.165549 | 1.164440  | 1.192222  |
| C    | -4.572224 | -1.400549 | -0.519619 |
| H    | -5.371698 | 0.191604  | 0.686003  |
| N    | -0.039169 | -1.708905 | 1.536136  |
| H    | 1.957255  | -2.794007 | 0.458864  |
| H    | 4.287304  | -2.765078 | 0.521401  |
| H    | 5.686133  | -0.799388 | 0.386719  |
| H    | 5.167119  | 1.098885  | -0.903253 |
| H    | 3.175949  | 1.370719  | -2.215412 |
| H    | 1.065739  | 0.559642  | -1.697416 |
| H    | -1.271300 | -1.927254 | -1.109990 |
| H    | -3.490653 | -2.886438 | -1.640112 |
| H    | -5.543927 | -1.827120 | -0.740940 |
| H    | -0.812813 | -1.455161 | 2.136333  |
| H    | 0.730095  | -2.056310 | 2.094105  |

### 1.38 m062x\_3-amino-VHF-cis\_dcm

Gibbs free energy: -857.540810  
Electronic and ZPE: -857.493859

| Atom | X         | Y         | Z         |
|------|-----------|-----------|-----------|
| C    | 1.544061  | -0.713369 | 0.015663  |
| C    | 2.455820  | -1.836760 | 0.275968  |
| C    | 3.801845  | -1.817769 | 0.279639  |
| C    | 4.674079  | -0.694757 | -0.000991 |
| C    | 4.366089  | 0.381903  | -0.753776 |
| C    | 3.103609  | 0.651656  | -1.411814 |
| C    | 1.880313  | 0.188608  | -1.087593 |
| C    | -0.500305 | 1.603589  | 0.294717  |
| C    | -0.729817 | 0.258215  | 0.321634  |
| C    | 0.335927  | -0.697846 | 0.651493  |
| C    | 0.720555  | 2.193997  | 0.754528  |
| C    | -1.462110 | 2.546483  | -0.197846 |
| N    | 1.675711  | 2.713709  | 1.131199  |
| N    | -2.198575 | 3.333799  | -0.600705 |
| C    | -2.070493 | -0.300907 | 0.045445  |
| C    | -2.173345 | -1.445406 | -0.755710 |
| C    | -3.228574 | 0.276426  | 0.575670  |
| C    | -3.419229 | -1.977650 | -1.053322 |
| C    | -4.473608 | -0.272182 | 0.290886  |
| H    | -3.156025 | 1.135688  | 1.232728  |
| C    | -4.570907 | -1.391498 | -0.530217 |
| H    | -5.366008 | 0.173064  | 0.714439  |
| N    | -0.043236 | -1.704828 | 1.553745  |
| H    | 1.975391  | -2.790337 | 0.488242  |
| H    | 4.302076  | -2.747484 | 0.536428  |
| H    | 5.693524  | -0.781558 | 0.362123  |
| H    | 5.158608  | 1.097868  | -0.950443 |
| H    | 3.151240  | 1.350689  | -2.241663 |
| H    | 1.049353  | 0.538989  | -1.695587 |
| H    | -1.271963 | -1.904826 | -1.147468 |
| H    | -3.493658 | -2.853456 | -1.686982 |
| H    | -5.543204 | -1.814523 | -0.755226 |
| H    | -0.787268 | -1.430331 | 2.182183  |
| H    | 0.727185  | -2.088933 | 2.085312  |

### 1.39 m062x\_3-amino-VHF-cis\_m

Gibbs free energy: -857.543453  
Electronic and ZPE: -857.496386

| Atom | X         | Y         | Z         |
|------|-----------|-----------|-----------|
| C    | 1.544124  | -0.713457 | 0.021200  |
| C    | 2.458991  | -1.833888 | 0.284746  |
| C    | 3.805057  | -1.812250 | 0.284067  |
| C    | 4.674538  | -0.689498 | -0.007247 |
| C    | 4.362193  | 0.381551  | -0.766637 |
| C    | 3.096349  | 0.645221  | -1.421312 |
| C    | 1.874825  | 0.182373  | -1.089142 |
| C    | -0.501334 | 1.602847  | 0.297212  |
| C    | -0.729385 | 0.257293  | 0.325610  |
| C    | 0.337066  | -0.696829 | 0.659491  |
| C    | 0.717920  | 2.195160  | 0.758116  |
| C    | -1.463056 | 2.543350  | -0.199368 |
| N    | 1.671824  | 2.716916  | 1.135313  |
| N    | -2.198990 | 3.328964  | -0.606619 |
| C    | -2.068871 | -0.302251 | 0.046368  |
| C    | -2.170266 | -1.440605 | -0.763700 |
| C    | -3.227079 | 0.270019  | 0.581850  |
| C    | -3.415816 | -1.972067 | -1.064682 |
| C    | -4.471655 | -0.278406 | 0.294021  |
| H    | -3.154449 | 1.123284  | 1.246751  |
| C    | -4.567967 | -1.391553 | -0.535824 |
| H    | -5.364308 | 0.161391  | 0.722685  |
| N    | -0.042762 | -1.698257 | 1.566107  |
| H    | 1.982122  | -2.787566 | 0.504001  |
| H    | 4.307876  | -2.739231 | 0.545400  |
| H    | 5.695731  | -0.772964 | 0.351680  |
| H    | 5.153599  | 1.096095  | -0.972898 |
| H    | 3.139770  | 1.338036  | -2.256621 |
| H    | 1.041271  | 0.526648  | -1.696974 |
| H    | -1.268632 | -1.895150 | -1.160643 |
| H    | -3.489654 | -2.842868 | -1.705229 |
| H    | -5.539763 | -1.814547 | -0.762919 |
| H    | -0.775909 | -1.415132 | 2.203615  |
| H    | 0.728030  | -2.093423 | 2.088928  |

### 1.40 m062x\_3-amino-VHF-cis\_t

Gibbs free energy: -857.533689  
Electronic and ZPE: -857.486792

| Atom | X         | Y         | Z         |
|------|-----------|-----------|-----------|
| C    | 1.543156  | -0.712206 | 0.005376  |
| C    | 2.448376  | -1.841027 | 0.262601  |
| C    | 3.794117  | -1.828181 | 0.273581  |
| C    | 4.671814  | -0.705861 | 0.009899  |
| C    | 4.372128  | 0.379698  | -0.732224 |
| C    | 3.116206  | 0.660153  | -1.397286 |
| C    | 1.889727  | 0.198276  | -1.086874 |
| C    | -0.500049 | 1.608394  | 0.289963  |
| C    | -0.731117 | 0.263809  | 0.314885  |
| C    | 0.334635  | -0.695008 | 0.638315  |
| C    | 0.725128  | 2.195496  | 0.744876  |
| C    | -1.464051 | 2.555020  | -0.193208 |
| N    | 1.684174  | 2.710254  | 1.117883  |
| N    | -2.204435 | 3.343504  | -0.586003 |
| C    | -2.072799 | -0.298061 | 0.043569  |
| C    | -2.174266 | -1.457008 | -0.736598 |
| C    | -3.233375 | 0.287454  | 0.559062  |
| C    | -3.418807 | -1.994829 | -1.028606 |
| C    | -4.477207 | -0.265339 | 0.279019  |
| H    | -3.164580 | 1.161103  | 1.197039  |
| C    | -4.572057 | -1.399171 | -0.521494 |
| H    | -5.371128 | 0.189905  | 0.688586  |
| N    | -0.040522 | -1.708832 | 1.538263  |
| H    | 1.959794  | -2.793191 | 0.463499  |
| H    | 4.289104  | -2.762936 | 0.522834  |
| H    | 5.687873  | -0.798172 | 0.381227  |
| H    | 5.166607  | 1.098007  | -0.911291 |
| H    | 3.172104  | 1.368976  | -2.218206 |
| H    | 1.063289  | 0.558528  | -1.695427 |
| H    | -1.271256 | -1.924897 | -1.114111 |
| H    | -3.490824 | -2.882494 | -1.645964 |
| H    | -5.543832 | -1.825176 | -0.743492 |
| H    | -0.809932 | -1.451994 | 2.142661  |
| H    | 0.728890  | -2.061784 | 2.092499  |

### 1.41 m062x\_A-NBD\_an

Gibbs free energy: -769.370811  
Electronic and ZPE: -769.326524

| Atom | X         | Y         | Z         |
|------|-----------|-----------|-----------|
| C    | 1.265046  | -2.615254 | 1.156499  |
| H    | 0.904212  | -3.149463 | 2.025615  |
| C    | 2.392811  | -1.920709 | 1.019059  |
| H    | 3.171457  | -1.755451 | 1.751952  |
| C    | 0.478070  | -2.462561 | -0.155611 |
| H    | -0.327134 | -3.173849 | -0.324784 |
| C    | 2.366428  | -1.294180 | -0.384699 |
| H    | 3.310917  | -0.915056 | -0.764475 |
| C    | 1.666246  | -2.443594 | -1.150284 |
| H    | 1.375813  | -2.169689 | -2.165763 |
| H    | 2.233923  | -3.374424 | -1.146060 |
| C    | 0.062856  | -0.977695 | -0.260753 |
| C    | 1.209814  | -0.280847 | -0.389472 |
| C    | -1.348627 | -0.584122 | -0.158457 |
| C    | -2.162698 | -1.227734 | 0.782122  |
| C    | -1.922018 | 0.368217  | -1.008885 |
| C    | -3.508234 | -0.896495 | 0.900030  |
| H    | -1.734782 | -1.982183 | 1.434984  |
| C    | -3.271510 | 0.682617  | -0.904588 |
| H    | -1.306507 | 0.852481  | -1.756596 |
| C    | -4.066576 | 0.059078  | 0.055323  |
| H    | -4.121479 | -1.391153 | 1.644647  |
| H    | -3.705524 | 1.414996  | -1.575991 |
| H    | -5.118075 | 0.310020  | 0.137297  |
| C    | 1.489593  | 1.161228  | -0.336029 |
| O    | 2.613717  | 1.615872  | -0.371729 |
| O    | 0.396704  | 1.921659  | -0.225378 |
| C    | 0.589078  | 3.345451  | -0.131211 |
| H    | 1.354202  | 3.646972  | -0.846568 |
| H    | -0.368388 | 3.765264  | -0.436158 |
| C    | 0.949117  | 3.756428  | 1.282339  |
| H    | 1.905479  | 3.327303  | 1.582468  |
| H    | 1.027027  | 4.843846  | 1.340107  |
| H    | 0.179110  | 3.431188  | 1.983887  |

### 1.42 m062x\_A-NBD\_ch

Gibbs free energy: -769.364565  
Electronic and ZPE: -769.320625

| Atom | X         | Y         | Z         |
|------|-----------|-----------|-----------|
| C    | 1.444716  | -2.517450 | 1.137343  |
| H    | 1.115124  | -3.080952 | 2.000315  |
| C    | 2.518269  | -1.739538 | 1.019109  |
| H    | 3.270499  | -1.517245 | 1.763948  |
| C    | 0.665456  | -2.414288 | -0.184762 |
| H    | -0.084009 | -3.181045 | -0.369559 |
| C    | 2.465342  | -1.109840 | -0.382099 |
| H    | 3.383747  | -0.656601 | -0.744227 |
| C    | 1.862706  | -2.303554 | -1.161781 |
| H    | 1.567030  | -2.046922 | -2.180340 |
| H    | 2.497606  | -3.189970 | -1.151626 |
| C    | 0.143418  | -0.962276 | -0.287604 |
| C    | 1.238130  | -0.185003 | -0.400478 |
| C    | -1.292219 | -0.673407 | -0.171063 |
| C    | -2.044448 | -1.377741 | 0.777066  |
| C    | -1.946511 | 0.233525  | -1.011149 |
| C    | -3.408976 | -1.151315 | 0.911596  |
| H    | -1.550814 | -2.095726 | 1.424741  |
| C    | -3.314536 | 0.443208  | -0.890160 |
| H    | -1.377016 | 0.764486  | -1.762932 |
| C    | -4.048493 | -0.240536 | 0.075988  |
| H    | -3.973880 | -1.691803 | 1.662712  |
| H    | -3.811091 | 1.141419  | -1.554771 |
| H    | -5.115165 | -0.071005 | 0.170592  |
| C    | 1.421851  | 1.270666  | -0.301799 |
| O    | 2.508010  | 1.786483  | -0.167426 |
| O    | 0.279335  | 1.966959  | -0.358421 |
| C    | 0.376358  | 3.390204  | -0.183372 |
| H    | 1.221699  | 3.761801  | -0.763348 |
| H    | -0.548625 | 3.775885  | -0.610616 |
| C    | 0.503274  | 3.754439  | 1.282645  |
| H    | 1.435287  | 3.370740  | 1.698004  |
| H    | 0.498873  | 4.840563  | 1.395924  |
| H    | -0.334047 | 3.346282  | 1.851079  |

### 1.43 m062x\_A-NBD\_dcm

Gibbs free energy: -769.369153  
Electronic and ZPE: -769.325049

| Atom | X         | Y         | Z         |
|------|-----------|-----------|-----------|
| C    | 1.394961  | -2.546969 | 1.147123  |
| H    | 1.056409  | -3.101042 | 2.012763  |
| C    | 2.486198  | -1.794932 | 1.019461  |
| H    | 3.249645  | -1.590604 | 1.758342  |
| C    | 0.610274  | -2.431114 | -0.170489 |
| H    | -0.156733 | -3.181933 | -0.346952 |
| C    | 2.437842  | -1.167445 | -0.383241 |
| H    | 3.364241  | -0.738781 | -0.754732 |
| C    | 1.803118  | -2.349154 | -1.156107 |
| H    | 1.506538  | -2.088303 | -2.173262 |
| H    | 2.417813  | -3.249614 | -1.149014 |
| C    | 0.120338  | -0.968804 | -0.274875 |
| C    | 1.231345  | -0.214878 | -0.395207 |
| C    | -1.309250 | -0.648521 | -0.165432 |
| C    | -2.081069 | -1.331114 | 0.783268  |
| C    | -1.939015 | 0.267937  | -1.014917 |
| C    | -3.441304 | -1.072620 | 0.909923  |
| H    | -1.607876 | -2.058001 | 1.436205  |
| C    | -3.302846 | 0.509213  | -0.901933 |
| H    | -1.355296 | 0.781700  | -1.768117 |
| C    | -4.056343 | -0.152198 | 0.065689  |
| H    | -4.021649 | -1.596208 | 1.661142  |
| H    | -3.780509 | 1.214388  | -1.572887 |
| H    | -5.119237 | 0.042078  | 0.154475  |
| C    | 1.440578  | 1.237946  | -0.316294 |
| O    | 2.542145  | 1.741037  | -0.257052 |
| O    | 0.308849  | 1.948791  | -0.298345 |
| C    | 0.429670  | 3.376572  | -0.163628 |
| H    | 1.241218  | 3.725016  | -0.802577 |
| H    | -0.514917 | 3.761922  | -0.544979 |
| C    | 0.645551  | 3.772927  | 1.283172  |
| H    | 1.591397  | 3.381281  | 1.658354  |
| H    | 0.667015  | 4.861264  | 1.367337  |
| H    | -0.166313 | 3.397136  | 1.908005  |

### 1.44 m062x\_A-NBD\_m

Gibbs free energy: -769.370774  
Electronic and ZPE: -769.326477

| Atom | X         | Y         | Z         |
|------|-----------|-----------|-----------|
| C    | 1.266896  | -2.614243 | 1.156347  |
| H    | 0.906375  | -3.148683 | 2.025452  |
| C    | 2.394181  | -1.918909 | 1.019006  |
| H    | 3.172627  | -1.753067 | 1.751975  |
| C    | 0.479941  | -2.462116 | -0.155843 |
| H    | -0.324754 | -3.173966 | -0.325103 |
| C    | 2.367482  | -1.292397 | -0.384750 |
| H    | 3.311725  | -0.912562 | -0.764419 |
| C    | 1.668191  | -2.442294 | -1.150405 |
| H    | 1.377657  | -2.168589 | -2.165911 |
| H    | 2.236538  | -3.372714 | -1.146128 |
| C    | 0.063673  | -0.977536 | -0.261005 |
| C    | 1.210146  | -0.279895 | -0.389650 |
| C    | -1.348089 | -0.585011 | -0.158545 |
| C    | -2.161513 | -1.229153 | 0.782227  |
| C    | -1.922368 | 0.366760  | -1.008995 |
| C    | -3.507292 | -0.899002 | 0.900285  |
| H    | -1.732874 | -1.983146 | 1.435144  |
| C    | -3.272105 | 0.680065  | -0.904553 |
| H    | -1.307341 | 0.851442  | -1.756828 |
| C    | -4.066533 | 0.056001  | 0.055529  |
| H    | -4.120026 | -1.394055 | 1.645061  |
| H    | -3.706808 | 1.412008  | -1.575988 |
| H    | -5.118225 | 0.306095  | 0.137616  |
| C    | 1.489022  | 1.162341  | -0.335706 |
| O    | 2.612928  | 1.617603  | -0.369464 |
| O    | 0.395494  | 1.922171  | -0.226977 |
| C    | 0.587020  | 3.345995  | -0.131862 |
| H    | 1.353212  | 3.648208  | -0.845792 |
| H    | -0.370139 | 3.765473  | -0.438237 |
| C    | 0.944488  | 3.756557  | 1.282467  |
| H    | 1.900586  | 3.327813  | 1.583972  |
| H    | 1.021730  | 4.843993  | 1.340845  |
| H    | 0.173496  | 3.430579  | 1.982586  |

### 1.45 m062x\_A-NBD\_t

Gibbs free energy: -769.365249

Electronic and ZPE: -769.321299

| Atom | X         | Y         | Z         |
|------|-----------|-----------|-----------|
| C    | 1.442206  | -2.519128 | 1.138235  |
| H    | 1.112114  | -3.081979 | 2.001449  |
| C    | 2.517030  | -1.743034 | 1.018969  |
| H    | 3.270375  | -1.522052 | 1.763118  |
| C    | 0.662222  | -2.415345 | -0.183388 |
| H    | -0.088393 | -3.181142 | -0.367272 |
| C    | 2.463869  | -1.113481 | -0.382336 |
| H    | 3.382728  | -0.662057 | -0.745554 |
| C    | 1.858885  | -2.306442 | -1.161378 |
| H    | 1.562836  | -2.049565 | -2.179756 |
| H    | 2.492489  | -3.193772 | -1.151695 |
| C    | 0.142196  | -0.962705 | -0.286285 |
| C    | 1.237951  | -0.186820 | -0.399833 |
| C    | -1.293148 | -0.671981 | -0.170407 |
| C    | -2.046653 | -1.374892 | 0.777847  |
| C    | -1.945929 | 0.235209  | -1.011520 |
| C    | -3.411051 | -1.146661 | 0.911525  |
| H    | -1.554382 | -2.093278 | 1.426105  |
| C    | -3.313831 | 0.446613  | -0.891434 |
| H    | -1.375576 | 0.765025  | -1.763505 |
| C    | -4.049086 | -0.235634 | 0.074914  |
| H    | -3.976968 | -1.686004 | 1.662689  |
| H    | -3.809200 | 1.144972  | -1.556759 |
| H    | -5.115592 | -0.064749 | 0.168885  |
| C    | 1.422750  | 1.268728  | -0.302899 |
| O    | 2.510243  | 1.784371  | -0.175101 |
| O    | 0.280636  | 1.965305  | -0.352988 |
| C    | 0.378267  | 3.389304  | -0.181879 |
| H    | 1.220299  | 3.759637  | -0.767368 |
| H    | -0.548959 | 3.773597  | -0.605347 |
| C    | 0.512411  | 3.757140  | 1.282543  |
| H    | 1.446017  | 3.373975  | 1.694841  |
| H    | 0.509173  | 4.843549  | 1.392774  |
| H    | -0.322518 | 3.351217  | 1.856061  |

### 1.46 m062x\_A-QC\_an

Gibbs free energy: -769.346847

Electronic and ZPE: -769.302511

| Atom | X         | Y         | Z         |
|------|-----------|-----------|-----------|
| C    | 0.455001  | -2.095742 | 1.208051  |
| H    | 0.013110  | -2.412237 | 2.142122  |
| C    | 1.858556  | -1.499671 | 1.009213  |
| H    | 2.562109  | -1.203879 | 1.773832  |
| C    | 0.109838  | -2.658290 | -0.148459 |
| H    | -0.772609 | -3.277429 | -0.246376 |
| C    | 2.204161  | -1.753317 | -0.419528 |
| H    | 3.202390  | -1.531126 | -0.772292 |
| C    | 1.355568  | -2.873618 | -0.978527 |
| H    | 1.167740  | -2.753814 | -2.047851 |
| H    | 1.808591  | -3.852075 | -0.801335 |
| C    | -0.102894 | -1.181409 | 0.141805  |
| C    | 1.305831  | -0.574029 | -0.077805 |
| C    | -1.418741 | -0.512960 | 0.036344  |
| C    | -2.331788 | -0.549591 | 1.089755  |
| C    | -1.779051 | 0.139611  | -1.148108 |
| C    | -3.585898 | 0.046921  | 0.963319  |
| H    | -2.058137 | -1.042968 | 2.016584  |
| C    | -3.024225 | 0.741872  | -1.272800 |
| H    | -1.070939 | 0.178162  | -1.969705 |
| C    | -3.934458 | 0.696040  | -0.215950 |
| H    | -4.285359 | 0.009311  | 1.791187  |
| H    | -3.289373 | 1.246707  | -2.195310 |
| H    | -4.906773 | 1.165627  | -0.313885 |
| C    | 1.754872  | 0.811494  | -0.232320 |
| O    | 2.920498  | 1.142795  | -0.282603 |
| O    | 0.736193  | 1.674298  | -0.291679 |
| C    | 1.062379  | 3.073918  | -0.391593 |
| H    | 1.889288  | 3.195392  | -1.091019 |
| H    | 0.168121  | 3.528368  | -0.815140 |
| C    | 1.388951  | 3.654073  | 0.969550  |
| H    | 2.280169  | 3.186405  | 1.389303  |
| H    | 1.574328  | 4.726024  | 0.877922  |
| H    | 0.555189  | 3.508964  | 1.658531  |



### 1.47 m062x\_A-QC\_ch

Gibbs free energy: -769.340675  
Electronic and ZPE: -769.296524

| Atom | X         | Y         | Z         |
|------|-----------|-----------|-----------|
| C    | 0.496003  | -2.107320 | 1.187123  |
| H    | 0.052733  | -2.453640 | 2.109988  |
| C    | 1.887568  | -1.474896 | 1.013942  |
| H    | 2.580436  | -1.179272 | 1.788228  |
| C    | 0.174851  | -2.651473 | -0.183269 |
| H    | -0.692999 | -3.287423 | -0.302022 |
| C    | 2.251249  | -1.695370 | -0.416140 |
| H    | 3.246363  | -1.438731 | -0.754268 |
| C    | 1.433892  | -2.824442 | -1.003400 |
| H    | 1.253997  | -2.690124 | -2.072592 |
| H    | 1.906494  | -3.795990 | -0.838510 |
| C    | -0.073387 | -1.186032 | 0.133705  |
| C    | 1.324036  | -0.543872 | -0.058278 |
| C    | -1.402992 | -0.543503 | 0.035496  |
| C    | -2.310958 | -0.604144 | 1.091016  |
| C    | -1.780740 | 0.107847  | -1.143257 |
| C    | -3.577758 | -0.035482 | 0.971885  |
| H    | -2.021847 | -1.093648 | 2.015184  |
| C    | -3.038725 | 0.682095  | -1.261060 |
| H    | -1.075022 | 0.167427  | -1.965405 |
| C    | -3.944285 | 0.610247  | -0.202688 |
| H    | -4.273421 | -0.091782 | 1.801924  |
| H    | -3.318027 | 1.185465  | -2.180246 |
| H    | -4.927467 | 1.057778  | -0.295622 |
| C    | 1.744851  | 0.853948  | -0.201021 |
| O    | 2.898810  | 1.215733  | -0.191550 |
| O    | 0.703337  | 1.684454  | -0.330374 |
| C    | 0.997067  | 3.088850  | -0.421296 |
| H    | 1.854554  | 3.229718  | -1.079961 |
| H    | 0.111127  | 3.518018  | -0.887483 |
| C    | 1.246248  | 3.682877  | 0.950735  |
| H    | 2.136434  | 3.246888  | 1.404811  |
| H    | 1.397706  | 4.761011  | 0.866082  |
| H    | 0.390255  | 3.506828  | 1.604326  |

### 1.48 m062x\_A-QC\_dcm

Gibbs free energy: -769.345504  
Electronic and ZPE: -769.301109

| Atom | X         | Y         | Z         |
|------|-----------|-----------|-----------|
| C    | 0.450274  | -2.099983 | 1.203137  |
| H    | 0.006166  | -2.419618 | 2.135114  |
| C    | 1.855187  | -1.505236 | 1.009297  |
| H    | 2.558545  | -1.213737 | 1.775719  |
| C    | 0.106369  | -2.656639 | -0.156156 |
| H    | -0.777232 | -3.273422 | -0.258536 |
| C    | 2.202821  | -1.754302 | -0.419817 |
| H    | 3.201921  | -1.531293 | -0.769661 |
| C    | 1.353449  | -2.871202 | -0.984436 |
| H    | 1.167842  | -2.747359 | -2.053743 |
| H    | 1.804341  | -3.851162 | -0.809810 |
| C    | -0.104308 | -1.180537 | 0.139695  |
| C    | 1.306053  | -0.574905 | -0.074577 |
| C    | -1.419319 | -0.510082 | 0.036014  |
| C    | -2.334418 | -0.553665 | 1.087113  |
| C    | -1.777332 | 0.150247  | -1.144555 |
| C    | -3.588456 | 0.042712  | 0.961995  |
| H    | -2.061936 | -1.052075 | 2.011598  |
| C    | -3.022478 | 0.752326  | -1.267975 |
| H    | -1.067269 | 0.194812  | -1.964076 |
| C    | -3.934954 | 0.698892  | -0.213726 |
| H    | -4.289539 | -0.000306 | 1.788243  |
| H    | -3.285943 | 1.263051  | -2.187744 |
| H    | -4.907405 | 1.168423  | -0.310733 |
| C    | 1.758860  | 0.810280  | -0.226359 |
| O    | 2.924688  | 1.139630  | -0.264763 |
| O    | 0.741053  | 1.673594  | -0.299304 |
| C    | 1.070293  | 3.072052  | -0.395176 |
| H    | 1.904267  | 3.192721  | -1.086525 |
| H    | 0.180330  | 3.528069  | -0.826207 |
| C    | 1.385868  | 3.650978  | 0.969232  |
| H    | 2.274794  | 3.183854  | 1.394299  |
| H    | 1.570691  | 4.723380  | 0.880907  |
| H    | 0.547043  | 3.503253  | 1.651456  |

### 1.49 m062x\_A-QC\_m

Gibbs free energy: -769.346805  
Electronic and ZPE: -769.302464

| Atom | X         | Y         | Z         |
|------|-----------|-----------|-----------|
| C    | 0.454494  | -2.095927 | 1.207876  |
| H    | 0.012487  | -2.412442 | 2.141886  |
| C    | 1.858192  | -1.500139 | 1.009185  |
| H    | 2.561796  | -1.204600 | 1.773854  |
| C    | 0.109265  | -2.658227 | -0.148717 |
| H    | -0.773330 | -3.277134 | -0.246775 |
| C    | 2.203808  | -1.753698 | -0.419571 |
| H    | 3.202101  | -1.531652 | -0.772248 |
| C    | 1.354993  | -2.873746 | -0.978740 |
| H    | 1.167244  | -2.753784 | -2.048062 |
| H    | 1.807781  | -3.852329 | -0.801633 |
| C    | -0.103147 | -1.181330 | 0.141725  |
| C    | 1.305734  | -0.574250 | -0.077729 |
| C    | -1.418865 | -0.512617 | 0.036328  |
| C    | -2.332074 | -0.549549 | 1.089580  |
| C    | -1.778926 | 0.140445  | -1.147919 |
| C    | -3.586104 | 0.047118  | 0.963179  |
| H    | -2.058594 | -1.043269 | 2.016277  |
| C    | -3.024022 | 0.742861  | -1.272574 |
| H    | -1.070679 | 0.179249  | -1.969384 |
| C    | -3.934424 | 0.696704  | -0.215895 |
| H    | -4.285691 | 0.009273  | 1.790931  |
| H    | -3.288979 | 1.248073  | -2.194933 |
| H    | -4.906683 | 1.166416  | -0.313804 |
| C    | 1.755160  | 0.811180  | -0.232142 |
| O    | 2.920859  | 1.142188  | -0.282054 |
| O    | 0.736675  | 1.674198  | -0.291908 |
| C    | 1.063231  | 3.073720  | -0.391627 |
| H    | 1.890389  | 3.195041  | -1.090793 |
| H    | 0.169195  | 3.528413  | -0.815388 |
| C    | 1.389570  | 3.653707  | 0.969649  |
| H    | 2.280631  | 3.185871  | 1.389542  |
| H    | 1.575129  | 4.725643  | 0.878179  |
| H    | 0.555623  | 3.508633  | 1.658412  |

### 1.50 m062x\_A-QC\_t

Gibbs free energy: -769.341459  
Electronic and ZPE: -769.297239

| Atom | X         | Y         | Z         |
|------|-----------|-----------|-----------|
| C    | 0.488176  | -2.106775 | 1.188998  |
| H    | 0.044340  | -2.449173 | 2.113042  |
| C    | 1.882129  | -1.480496 | 1.013297  |
| H    | 2.576535  | -1.186125 | 1.786696  |
| C    | 0.163699  | -2.652180 | -0.180034 |
| H    | -0.706819 | -3.284832 | -0.296827 |
| C    | 2.243707  | -1.704945 | -0.416643 |
| H    | 3.239698  | -1.453692 | -0.756201 |
| C    | 1.421136  | -2.831639 | -1.001182 |
| H    | 1.240736  | -2.698399 | -2.070398 |
| H    | 1.890005  | -3.804770 | -0.835116 |
| C    | -0.078332 | -1.185063 | 0.134320  |
| C    | 1.321444  | -0.548868 | -0.060426 |
| C    | -1.405604 | -0.537916 | 0.035484  |
| C    | -2.315031 | -0.597020 | 1.089973  |
| C    | -1.780008 | 0.116003  | -1.143005 |
| C    | -3.579928 | -0.024107 | 0.970067  |
| H    | -2.028706 | -1.088747 | 2.013832  |
| C    | -3.036084 | 0.694515  | -1.261533 |
| H    | -1.073368 | 0.174122  | -1.964484 |
| C    | -3.943093 | 0.624346  | -0.204183 |
| H    | -4.276695 | -0.079219 | 1.799261  |
| H    | -3.312705 | 1.199918  | -2.180413 |
| H    | -4.924674 | 1.075270  | -0.297631 |
| C    | 1.747730  | 0.846941  | -0.204228 |
| O    | 2.903808  | 1.203484  | -0.200872 |
| O    | 0.709987  | 1.682743  | -0.326334 |
| C    | 1.009446  | 3.086254  | -0.417609 |
| H    | 1.864245  | 3.223892  | -1.080335 |
| H    | 0.123316  | 3.519563  | -0.879467 |
| C    | 1.267264  | 3.678127  | 0.953695  |
| H    | 2.156985  | 3.237545  | 1.404284  |
| H    | 1.423765  | 4.755483  | 0.868714  |
| H    | 0.413072  | 3.506286  | 1.610749  |

### 1.51 m062x\_A-TS\_an

Gibbs free energy: -769.279704  
Electronic and ZPE: -769.236493

| Atom | X         | Y         | Z         |
|------|-----------|-----------|-----------|
| C    | -0.123970 | 2.036708  | 1.307287  |
| H    | 0.425297  | 1.835720  | 2.211012  |
| C    | -1.472770 | 1.776878  | 1.064495  |
| H    | -2.155186 | 1.295349  | 1.756762  |
| C    | 0.411823  | 2.520707  | -0.038695 |
| H    | 1.400786  | 2.958211  | -0.075475 |
| C    | -1.791314 | 2.032170  | -0.366127 |
| H    | -2.832607 | 2.116561  | -0.649154 |
| C    | -0.787690 | 3.117071  | -0.765650 |
| H    | -0.638911 | 3.152814  | -1.844873 |
| H    | -1.045239 | 4.106427  | -0.384364 |
| C    | 0.270101  | 1.047332  | -0.123372 |
| C    | -1.077973 | 0.705074  | -0.715919 |
| C    | 1.467199  | 0.191650  | -0.048540 |
| C    | 2.533128  | 0.476409  | 0.815331  |
| C    | 1.603703  | -0.846777 | -0.976964 |
| C    | 3.697846  | -0.277023 | 0.768257  |
| H    | 2.457392  | 1.282957  | 1.535920  |
| C    | 2.784257  | -1.579544 | -1.039974 |
| H    | 0.787365  | -1.068587 | -1.650182 |
| C    | 3.828164  | -1.307106 | -0.161743 |
| H    | 4.507425  | -0.055992 | 1.454031  |
| H    | 2.881949  | -2.373269 | -1.771739 |
| H    | 4.740033  | -1.891957 | -0.200592 |
| C    | -1.815148 | -0.486219 | -0.532336 |
| O    | -3.043102 | -0.590884 | -0.647610 |
| O    | -1.052655 | -1.586780 | -0.236123 |
| C    | -1.736876 | -2.830385 | -0.070925 |
| H    | -2.530232 | -2.912860 | -0.813984 |
| H    | -0.984001 | -3.592866 | -0.275204 |
| C    | -2.286280 | -2.974725 | 1.336354  |
| H    | -3.027737 | -2.200916 | 1.539456  |
| H    | -2.762534 | -3.950326 | 1.457902  |
| H    | -1.482929 | -2.893265 | 2.071470  |

### 1.52 m062x\_A-TS\_ch

Gibbs free energy: -769.268351  
Electronic and ZPE: -769.225451

| Atom | X         | Y         | Z         |
|------|-----------|-----------|-----------|
| C    | -0.134059 | 2.052355  | 1.325482  |
| H    | 0.409444  | 1.799337  | 2.219356  |
| C    | -1.467047 | 1.740348  | 1.031436  |
| H    | -2.151174 | 1.209493  | 1.684505  |
| C    | 0.423258  | 2.515307  | -0.017162 |
| H    | 1.413919  | 2.950337  | -0.052667 |
| C    | -1.774372 | 2.035903  | -0.389173 |
| H    | -2.811138 | 2.109358  | -0.690858 |
| C    | -0.761988 | 3.119448  | -0.763346 |
| H    | -0.594603 | 3.158493  | -1.839727 |
| H    | -1.023348 | 4.107835  | -0.380665 |
| C    | 0.283190  | 1.042613  | -0.141916 |
| C    | -1.059059 | 0.706628  | -0.723657 |
| C    | 1.472394  | 0.183075  | -0.054335 |
| C    | 2.541202  | 0.477395  | 0.803339  |
| C    | 1.602000  | -0.869890 | -0.966496 |
| C    | 3.701914  | -0.280276 | 0.767132  |
| H    | 2.465778  | 1.294740  | 1.512255  |
| C    | 2.780410  | -1.606239 | -1.019742 |
| H    | 0.782605  | -1.096252 | -1.634017 |
| C    | 3.825905  | -1.324356 | -0.148063 |
| H    | 4.513789  | -0.053421 | 1.448465  |
| H    | 2.874402  | -2.411329 | -1.739441 |
| H    | 4.735616  | -1.913232 | -0.179520 |
| C    | -1.816577 | -0.478293 | -0.527370 |
| O    | -3.042467 | -0.548503 | -0.589138 |
| O    | -1.062932 | -1.594641 | -0.271633 |
| C    | -1.776436 | -2.817135 | -0.081873 |
| H    | -2.585131 | -2.883187 | -0.810373 |
| H    | -1.045599 | -3.599939 | -0.290179 |
| C    | -2.309137 | -2.934186 | 1.334663  |
| H    | -3.047430 | -2.155263 | 1.528189  |
| H    | -2.787967 | -3.905518 | 1.479936  |
| H    | -1.495557 | -2.842474 | 2.057389  |

### 1.53 m062x\_A-TS\_dcm

Gibbs free energy: -769.276971  
Electronic and ZPE: -769.233762

| Atom | X         | Y         | Z         |
|------|-----------|-----------|-----------|
| C    | -0.118898 | 2.040855  | 1.311431  |
| H    | 0.428399  | 1.825629  | 2.213028  |
| C    | -1.465021 | 1.772779  | 1.056748  |
| H    | -2.149136 | 1.280907  | 1.739935  |
| C    | 0.423379  | 2.517734  | -0.033891 |
| H    | 1.414270  | 2.951076  | -0.071050 |
| C    | -1.780073 | 2.038600  | -0.371671 |
| H    | -2.820019 | 2.123647  | -0.659230 |
| C    | -0.770837 | 3.119813  | -0.765394 |
| H    | -0.617641 | 3.155627  | -1.843947 |
| H    | -1.025943 | 4.109906  | -0.383919 |
| C    | 0.277067  | 1.044888  | -0.127961 |
| C    | -1.070888 | 0.708568  | -0.717933 |
| C    | 1.469636  | 0.184795  | -0.049621 |
| C    | 2.538390  | 0.471207  | 0.810465  |
| C    | 1.600453  | -0.859714 | -0.971806 |
| C    | 3.700115  | -0.286293 | 0.766094  |
| H    | 2.465963  | 1.282361  | 1.526408  |
| C    | 2.778549  | -1.596471 | -1.032489 |
| H    | 0.782036  | -1.081952 | -1.642193 |
| C    | 3.824850  | -1.322320 | -0.158108 |
| H    | 4.511903  | -0.064273 | 1.448988  |
| H    | 2.872211  | -2.394845 | -1.759696 |
| H    | 4.734670  | -1.910529 | -0.195211 |
| C    | -1.816957 | -0.478550 | -0.530943 |
| O    | -3.044650 | -0.571750 | -0.636515 |
| O    | -1.060351 | -1.584506 | -0.239666 |
| C    | -1.755145 | -2.821702 | -0.072889 |
| H    | -2.547653 | -2.898980 | -0.817552 |
| H    | -1.007596 | -3.590494 | -0.273284 |
| C    | -2.310033 | -2.958665 | 1.333083  |
| H    | -3.051599 | -2.183121 | 1.528618  |
| H    | -2.788440 | -3.932935 | 1.457403  |
| H    | -1.508931 | -2.875115 | 2.070463  |

### 1.54 m062x\_A-TS\_m

Gibbs free energy: -769.279610  
Electronic and ZPE: -769.236399

| Atom | X         | Y         | Z         |
|------|-----------|-----------|-----------|
| C    | -0.123796 | 2.036806  | 1.307442  |
| H    | 0.425394  | 1.835303  | 2.211098  |
| C    | -1.472504 | 1.776710  | 1.064223  |
| H    | -2.154987 | 1.294805  | 1.756161  |
| C    | 0.412237  | 2.520587  | -0.038501 |
| H    | 1.401272  | 2.957938  | -0.075279 |
| C    | -1.790910 | 2.032399  | -0.366322 |
| H    | -2.832152 | 2.116824  | -0.649516 |
| C    | -0.787081 | 3.117174  | -0.765611 |
| H    | -0.638139 | 3.152944  | -1.844809 |
| H    | -1.044542 | 4.106550  | -0.384299 |
| C    | 0.270346  | 1.047231  | -0.123535 |
| C    | -1.077723 | 0.705201  | -0.716018 |
| C    | 1.467287  | 0.191396  | -0.048582 |
| C    | 2.533326  | 0.476240  | 0.815135  |
| C    | 1.603589  | -0.847265 | -0.976767 |
| C    | 3.697945  | -0.277326 | 0.768156  |
| H    | 2.457711  | 1.282967  | 1.535545  |
| C    | 2.784062  | -1.580163 | -1.039697 |
| H    | 0.787173  | -1.069110 | -1.649873 |
| C    | 3.828063  | -1.307637 | -0.161622 |
| H    | 4.507610  | -0.056237 | 1.453812  |
| H    | 2.881609  | -2.374066 | -1.771288 |
| H    | 4.739866  | -1.892599 | -0.200411 |
| C    | -1.815225 | -0.485936 | -0.532320 |
| O    | -3.043174 | -0.590191 | -0.647274 |
| O    | -1.052952 | -1.586691 | -0.236254 |
| C    | -1.737556 | -2.830063 | -0.070974 |
| H    | -2.530912 | -2.912345 | -0.814058 |
| H    | -0.984887 | -3.592779 | -0.275142 |
| C    | -2.287099 | -2.974126 | 1.336283  |
| H    | -3.028507 | -2.200215 | 1.539161  |
| H    | -2.763478 | -3.949655 | 1.457943  |
| H    | -1.483790 | -2.892642 | 2.071443  |

### 1.55 m062x\_A-TS\_t

Gibbs free energy: -769.269641  
Electronic and ZPE: -769.226706

| Atom | X         | Y         | Z         |
|------|-----------|-----------|-----------|
| C    | -0.130501 | 2.050498  | 1.323424  |
| H    | 0.413280  | 1.802747  | 2.218629  |
| C    | -1.465724 | 1.745964  | 1.035218  |
| H    | -2.150144 | 1.220888  | 1.692668  |
| C    | 0.424957  | 2.515378  | -0.019496 |
| H    | 1.415957  | 2.949446  | -0.055240 |
| C    | -1.773828 | 2.037403  | -0.386641 |
| H    | -2.810993 | 2.113325  | -0.686351 |
| C    | -0.761196 | 3.120006  | -0.763538 |
| H    | -0.595801 | 3.158524  | -1.840222 |
| H    | -1.021044 | 4.108802  | -0.381003 |
| C    | 0.282990  | 1.042730  | -0.139843 |
| C    | -1.060284 | 0.707586  | -0.723095 |
| C    | 1.472156  | 0.182428  | -0.053514 |
| C    | 2.541251  | 0.475226  | 0.804299  |
| C    | 1.601279  | -0.869530 | -0.966978 |
| C    | 3.701740  | -0.282977 | 0.766836  |
| H    | 2.466789  | 1.291825  | 1.514141  |
| C    | 2.779298  | -1.606490 | -1.021405 |
| H    | 0.781867  | -1.094959 | -1.634829 |
| C    | 3.825191  | -1.326084 | -0.149555 |
| H    | 4.513832  | -0.057114 | 1.448223  |
| H    | 2.872740  | -2.410737 | -1.742119 |
| H    | 4.734641  | -1.915290 | -0.181915 |
| C    | -1.816772 | -0.477137 | -0.527871 |
| O    | -3.043030 | -0.550340 | -0.597003 |
| O    | -1.063250 | -1.592094 | -0.265363 |
| C    | -1.774496 | -2.816723 | -0.080442 |
| H    | -2.579463 | -2.884416 | -0.812872 |
| H    | -1.040809 | -3.597491 | -0.286272 |
| C    | -2.313238 | -2.936957 | 1.333516  |
| H    | -3.052721 | -2.158863 | 1.525935  |
| H    | -2.791924 | -3.908945 | 1.474679  |
| H    | -1.502910 | -2.846199 | 2.059987  |

### 1.56 m062x\_B-NBD\_an

Gibbs free energy: -709.002764  
Electronic and ZPE: -708.961444

| Atom | X         | Y         | Z         |
|------|-----------|-----------|-----------|
| C    | 3.669599  | -0.575969 | -0.992006 |
| H    | 4.328177  | -0.366462 | -1.824141 |
| C    | 2.850190  | -1.612554 | -0.828816 |
| C    | 2.080294  | -1.382741 | 0.481974  |
| H    | 1.588002  | -2.248800 | 0.916626  |
| C    | 3.456294  | 0.360961  | 0.207662  |
| H    | 4.216190  | 1.118007  | 0.381169  |
| C    | 3.202969  | -0.700151 | 1.306341  |
| C    | 2.010994  | 0.888773  | 0.092815  |
| C    | 1.173120  | -0.158425 | 0.253973  |
| C    | -0.280478 | -0.229843 | 0.162104  |
| C    | -1.094869 | 0.875370  | 0.430114  |
| C    | -0.902290 | -1.433624 | -0.210794 |
| C    | -2.478251 | 0.801257  | 0.320597  |
| H    | -0.650099 | 1.809315  | 0.753975  |
| C    | -2.275747 | -1.517838 | -0.334829 |
| H    | -0.299856 | -2.309686 | -0.424871 |
| C    | -3.075607 | -0.400224 | -0.069693 |
| H    | -3.072986 | 1.675967  | 0.547897  |
| H    | -2.755243 | -2.442709 | -0.633499 |
| C    | 1.688437  | 2.214125  | -0.281314 |
| N    | 1.458740  | 3.303177  | -0.588827 |
| O    | -4.408769 | -0.578146 | -0.208878 |
| C    | -5.259859 | 0.528887  | 0.049061  |
| H    | -6.271999 | 0.175348  | -0.127143 |
| H    | -5.163950 | 0.861964  | 1.085112  |
| H    | -5.038367 | 1.357356  | -0.627645 |
| H    | 2.680967  | -2.447516 | -1.495573 |
| H    | 2.851937  | -0.271771 | 2.245949  |
| H    | 4.057412  | -1.356109 | 1.471831  |

### 1.57 m062x\_B-NBD\_ch

Gibbs free energy: -708.995369  
Electronic and ZPE: -708.954127

| Atom | X         | Y         | Z         |
|------|-----------|-----------|-----------|
| C    | 3.662375  | -0.577275 | -1.007375 |
| H    | 4.312482  | -0.363975 | -1.845003 |
| C    | 2.843964  | -1.613996 | -0.843960 |
| C    | 2.080198  | -1.387059 | 0.470547  |
| H    | 1.590215  | -2.253814 | 0.907206  |
| C    | 3.455091  | 0.355029  | 0.196733  |
| H    | 4.216386  | 1.111241  | 0.369421  |
| C    | 3.208117  | -0.710753 | 1.292033  |
| C    | 2.010477  | 0.886001  | 0.092091  |
| C    | 1.172284  | -0.159763 | 0.251880  |
| C    | -0.281692 | -0.231119 | 0.165154  |
| C    | -1.092663 | 0.883325  | 0.400493  |
| C    | -0.908544 | -1.441866 | -0.174010 |
| C    | -2.475863 | 0.809011  | 0.293773  |
| H    | -0.644570 | 1.827265  | 0.687900  |
| C    | -2.281896 | -1.527190 | -0.292997 |
| H    | -0.308653 | -2.324384 | -0.367586 |
| C    | -3.077649 | -0.400851 | -0.059499 |
| H    | -3.067221 | 1.693421  | 0.490507  |
| H    | -2.767041 | -2.456741 | -0.566301 |
| C    | 1.695283  | 2.220934  | -0.258817 |
| N    | 1.472845  | 3.318040  | -0.539132 |
| O    | -4.411695 | -0.579752 | -0.193553 |
| C    | -5.256177 | 0.536500  | 0.019086  |
| H    | -6.269550 | 0.181779  | -0.149307 |
| H    | -5.165540 | 0.908104  | 1.043251  |
| H    | -5.028665 | 1.340400  | -0.685836 |
| H    | 2.671034  | -2.442856 | -1.517274 |
| H    | 2.861788  | -0.285906 | 2.235107  |
| H    | 4.063162  | -1.368376 | 1.449465  |

### 1.58 m062x\_B-NBD\_dcm

Gibbs free energy: -709.001081  
Electronic and ZPE: -708.959779

| Atom | X         | Y         | Z         |
|------|-----------|-----------|-----------|
| C    | 3.667998  | -0.576288 | -0.995847 |
| H    | 4.324561  | -0.365506 | -1.829201 |
| C    | 2.848641  | -1.612839 | -0.833210 |
| C    | 2.079948  | -1.384188 | 0.478403  |
| H    | 1.588083  | -2.250540 | 0.913161  |
| C    | 3.456030  | 0.359001  | 0.205235  |
| H    | 4.216343  | 1.115664  | 0.379039  |
| C    | 3.203786  | -0.703602 | 1.302626  |
| C    | 2.010982  | 0.887825  | 0.092692  |
| C    | 1.172738  | -0.158935 | 0.252918  |
| C    | -0.280962 | -0.230197 | 0.162431  |
| C    | -1.094397 | 0.877822  | 0.421013  |
| C    | -0.904281 | -1.436129 | -0.200607 |
| C    | -2.477733 | 0.803734  | 0.312508  |
| H    | -0.648699 | 1.814808  | 0.734393  |
| C    | -2.277726 | -1.520648 | -0.322999 |
| H    | -0.302678 | -2.314137 | -0.408850 |
| C    | -3.076421 | -0.400372 | -0.066920 |
| H    | -3.071501 | 1.681389  | 0.530912  |
| H    | -2.758775 | -2.447006 | -0.614317 |
| C    | 1.690960  | 2.215975  | -0.274862 |
| N    | 1.464220  | 3.307637  | -0.574566 |
| O    | -4.409810 | -0.578529 | -0.204253 |
| C    | -5.259064 | 0.531549  | 0.041026  |
| H    | -6.271622 | 0.177701  | -0.132516 |
| H    | -5.164183 | 0.875612  | 1.073767  |
| H    | -5.036000 | 1.352919  | -0.644019 |
| H    | 2.678473  | -2.445859 | -1.502130 |
| H    | 2.853719  | -0.276373 | 2.243152  |
| H    | 4.058233  | -1.360153 | 1.466154  |

### 1.59 m062x\_B-NBD\_m

Gibbs free energy: -709.002708  
Electronic and ZPE: -708.961388

| Atom | X         | Y         | Z         |
|------|-----------|-----------|-----------|
| C    | 3.669548  | -0.575982 | -0.992136 |
| H    | 4.328060  | -0.366427 | -1.824310 |
| C    | 2.850138  | -1.612565 | -0.828975 |
| C    | 2.080277  | -1.382796 | 0.481841  |
| H    | 1.587995  | -2.248867 | 0.916490  |
| C    | 3.456285  | 0.360885  | 0.207584  |
| H    | 4.216196  | 1.117915  | 0.381110  |
| C    | 3.202988  | -0.700282 | 1.306212  |
| C    | 2.010996  | 0.888736  | 0.092810  |
| C    | 1.173104  | -0.158445 | 0.253927  |
| C    | -0.280498 | -0.229855 | 0.162105  |
| C    | -1.094853 | 0.875464  | 0.429770  |
| C    | -0.902365 | -1.433716 | -0.210430 |
| C    | -2.478234 | 0.801353  | 0.320294  |
| H    | -0.650049 | 1.809522  | 0.753248  |
| C    | -2.275822 | -1.517942 | -0.334401 |
| H    | -0.299963 | -2.309851 | -0.424296 |
| C    | -3.075639 | -0.400228 | -0.069595 |
| H    | -3.072933 | 1.676172  | 0.547268  |
| H    | -2.755375 | -2.442869 | -0.632800 |
| C    | 1.688538  | 2.214191  | -0.281079 |
| N    | 1.458960  | 3.303343  | -0.588307 |
| O    | -4.408810 | -0.578159 | -0.208705 |
| C    | -5.259834 | 0.528988  | 0.048780  |
| H    | -6.271990 | 0.175436  | -0.127319 |
| H    | -5.163954 | 0.862466  | 1.084710  |
| H    | -5.038290 | 1.357198  | -0.628235 |
| H    | 2.680883  | -2.447454 | -1.495814 |
| H    | 2.851985  | -0.271945 | 2.245852  |
| H    | 4.057428  | -1.356263 | 1.471637  |

### 1.60 m062x\_B-NBD\_t

Gibbs free energy: -708.996293  
Electronic and ZPE: -708.955043

| Atom | X         | Y         | Z         |
|------|-----------|-----------|-----------|
| C    | 3.663153  | -0.576867 | -1.005865 |
| H    | 4.314150  | -0.363638 | -1.842839 |
| C    | 2.844617  | -1.613620 | -0.842864 |
| C    | 2.080133  | -1.386842 | 0.471287  |
| H    | 1.589929  | -2.253680 | 0.907428  |
| C    | 3.455191  | 0.355489  | 0.198091  |
| H    | 4.216313  | 1.111730  | 0.371183  |
| C    | 3.207406  | -0.710118 | 1.293404  |
| C    | 2.010473  | 0.886175  | 0.092433  |
| C    | 1.172251  | -0.159794 | 0.251944  |
| C    | -0.281652 | -0.231129 | 0.164785  |
| C    | -1.092911 | 0.882548  | 0.403118  |
| C    | -0.908110 | -1.441284 | -0.177404 |
| C    | -2.476133 | 0.808391  | 0.296188  |
| H    | -0.645104 | 1.825602  | 0.693959  |
| C    | -2.281495 | -1.526425 | -0.296793 |
| H    | -0.308101 | -2.323291 | -0.372873 |
| C    | -3.077585 | -0.400783 | -0.060420 |
| H    | -3.067775 | 1.691986  | 0.495647  |
| H    | -2.766051 | -2.455619 | -0.572425 |
| C    | 1.694843  | 2.220213  | -0.260689 |
| N    | 1.472428  | 3.316725  | -0.543748 |
| O    | -4.411517 | -0.579504 | -0.194815 |
| C    | -5.256592 | 0.536260  | 0.021756  |
| H    | -6.269841 | 0.181680  | -0.147377 |
| H    | -5.165435 | 0.904385  | 1.047021  |
| H    | -5.029399 | 1.342196  | -0.680778 |
| H    | 2.672033  | -2.442833 | -1.515840 |
| H    | 2.860521  | -0.285198 | 2.236228  |
| H    | 4.062351  | -1.367637 | 1.451574  |

### 1.61 m062x\_B-QC\_an

Gibbs free energy: -708.973119  
Electronic and ZPE: -708.931731

| Atom | X         | Y         | Z         |
|------|-----------|-----------|-----------|
| C    | 3.193045  | -0.163143 | -0.924254 |
| H    | 3.752305  | 0.117202  | -1.804138 |
| C    | 2.225555  | -1.349441 | -0.770090 |
| C    | 2.073067  | -1.503407 | 0.722410  |
| H    | 1.554035  | -2.371798 | 1.107281  |
| C    | 3.521897  | 0.264509  | 0.473132  |
| H    | 4.298164  | 1.000717  | 0.633296  |
| C    | 3.222861  | -0.846978 | 1.454203  |
| C    | 2.217457  | 0.727128  | -0.160892 |
| C    | 1.244546  | -0.473911 | -0.024424 |
| C    | -0.229003 | -0.404326 | -0.069001 |
| C    | -0.910294 | 0.621151  | 0.583184  |
| C    | -0.980057 | -1.374886 | -0.742674 |
| C    | -2.302991 | 0.690917  | 0.574068  |
| H    | -0.353812 | 1.385647  | 1.116401  |
| C    | -2.363754 | -1.326402 | -0.749716 |
| H    | -0.473458 | -2.176398 | -1.270537 |
| C    | -3.035376 | -0.290502 | -0.092895 |
| H    | -2.793891 | 1.506242  | 1.089017  |
| H    | -2.946351 | -2.078088 | -1.270181 |
| C    | 1.876723  | 2.076296  | -0.438296 |
| N    | 1.588235  | 3.168983  | -0.668592 |
| O    | -4.392461 | -0.320018 | -0.163256 |
| C    | -5.108233 | 0.716049  | 0.487908  |
| H    | -6.161144 | 0.510849  | 0.313441  |
| H    | -4.909615 | 0.714880  | 1.562667  |
| H    | -4.852650 | 1.692676  | 0.069143  |
| H    | 2.030081  | -2.120647 | -1.500995 |
| H    | 2.928447  | -0.464725 | 2.433574  |
| H    | 4.077260  | -1.517624 | 1.571245  |

### 1.62 m062x\_B-QC\_ch

Gibbs free energy: -708.965183  
Electronic and ZPE: -708.923839

| Atom | X         | Y         | Z         |
|------|-----------|-----------|-----------|
| C    | 3.184012  | -0.161077 | -0.937064 |
| H    | 3.743165  | 0.124823  | -1.815322 |
| C    | 2.209813  | -1.343017 | -0.793214 |
| C    | 2.062982  | -1.516553 | 0.697583  |
| H    | 1.536184  | -2.383558 | 1.075336  |
| C    | 3.522136  | 0.243426  | 0.466611  |
| H    | 4.303557  | 0.972716  | 0.634404  |
| C    | 3.223005  | -0.881549 | 1.432111  |
| C    | 2.221151  | 0.724944  | -0.157492 |
| C    | 1.239218  | -0.469817 | -0.030416 |
| C    | -0.234371 | -0.398879 | -0.067918 |
| C    | -0.912258 | 0.661603  | 0.526067  |
| C    | -0.988154 | -1.408821 | -0.677441 |
| C    | -2.305003 | 0.726285  | 0.522460  |
| H    | -0.354776 | 1.462164  | 1.001207  |
| C    | -2.370598 | -1.365045 | -0.677519 |
| H    | -0.483074 | -2.237429 | -1.163949 |
| C    | -3.039745 | -0.293728 | -0.078188 |
| H    | -2.793468 | 1.572789  | 0.986958  |
| H    | -2.958160 | -2.144225 | -1.149108 |
| C    | 1.900407  | 2.087832  | -0.404074 |
| N    | 1.639815  | 3.192502  | -0.603503 |
| O    | -4.396666 | -0.331791 | -0.138037 |
| C    | -5.109480 | 0.741915  | 0.442212  |
| H    | -6.163004 | 0.525175  | 0.284292  |
| H    | -4.909956 | 0.813950  | 1.515234  |
| H    | -4.856565 | 1.689933  | -0.040865 |
| H    | 2.002561  | -2.101091 | -1.534725 |
| H    | 2.936746  | -0.512508 | 2.419195  |
| H    | 4.072719  | -1.561040 | 1.533848  |



### 1.63 m062x\_B-QC\_dcm

Gibbs free energy: -708.971218  
Electronic and ZPE: -708.929911

| Atom | X         | Y         | Z         |
|------|-----------|-----------|-----------|
| C    | 3.190813  | -0.163041 | -0.927179 |
| H    | 3.750245  | 0.119248  | -1.806351 |
| C    | 2.220669  | -1.347615 | -0.777092 |
| C    | 2.069051  | -1.507808 | 0.714754  |
| H    | 1.547074  | -2.375699 | 1.096855  |
| C    | 3.521915  | 0.257238  | 0.472252  |
| H    | 4.300045  | 0.990909  | 0.635357  |
| C    | 3.221668  | -0.858329 | 1.448303  |
| C    | 2.218776  | 0.726248  | -0.159217 |
| C    | 1.242653  | -0.472584 | -0.026637 |
| C    | -0.230870 | -0.402272 | -0.069465 |
| C    | -0.911117 | 0.634593  | 0.564653  |
| C    | -0.982861 | -1.385689 | -0.723127 |
| C    | -2.303865 | 0.702752  | 0.557482  |
| H    | -0.354266 | 1.410632  | 1.080242  |
| C    | -2.366246 | -1.338727 | -0.727782 |
| H    | -0.476888 | -2.196001 | -1.238192 |
| C    | -3.037069 | -0.291366 | -0.088713 |
| H    | -2.793964 | 1.528246  | 1.056757  |
| H    | -2.950243 | -2.099468 | -1.233163 |
| C    | 1.885398  | 2.079685  | -0.428085 |
| N    | 1.607172  | 3.176529  | -0.649879 |
| O    | -4.394180 | -0.323607 | -0.155386 |
| C    | -5.108765 | 0.724761  | 0.474835  |
| H    | -6.161974 | 0.516001  | 0.306061  |
| H    | -4.909063 | 0.745901  | 1.549396  |
| H    | -4.854124 | 1.692920  | 0.035912  |
| H    | 2.021827  | -2.114558 | -1.511597 |
| H    | 2.929296  | -0.480102 | 2.429906  |
| H    | 4.074369  | -1.531957 | 1.561157  |

### 1.64 m062x\_B-QC\_m

Gibbs free energy: -708.973058  
Electronic and ZPE: -708.931670

| Atom | X         | Y         | Z         |
|------|-----------|-----------|-----------|
| C    | 3.192962  | -0.163144 | -0.924367 |
| H    | 3.752230  | 0.117274  | -1.804222 |
| C    | 2.225357  | -1.349365 | -0.770367 |
| C    | 2.072903  | -1.503581 | 0.722106  |
| H    | 1.553747  | -2.371950 | 1.106861  |
| C    | 3.521910  | 0.264210  | 0.473099  |
| H    | 4.298257  | 1.000311  | 0.633376  |
| C    | 3.222812  | -0.847435 | 1.453971  |
| C    | 2.217520  | 0.727098  | -0.160821 |
| C    | 1.244472  | -0.473846 | -0.024510 |
| C    | -0.229075 | -0.404233 | -0.069018 |
| C    | -0.910332 | 0.621701  | 0.582449  |
| C    | -0.980164 | -1.375323 | -0.741891 |
| C    | -2.303033 | 0.691398  | 0.573408  |
| H    | -0.353843 | 1.386661  | 1.114982  |
| C    | -2.363851 | -1.326907 | -0.748838 |
| H    | -0.473590 | -2.177194 | -1.269239 |
| C    | -3.035447 | -0.290541 | -0.092729 |
| H    | -2.793904 | 1.507130  | 1.087739  |
| H    | -2.946493 | -2.078970 | -1.268702 |
| C    | 1.877084  | 2.076433  | -0.437896 |
| N    | 1.588984  | 3.169282  | -0.667863 |
| O    | -4.392534 | -0.320173 | -0.162946 |
| C    | -5.108264 | 0.716403  | 0.487382  |
| H    | -6.161186 | 0.511060  | 0.313130  |
| H    | -4.909611 | 0.716121  | 1.562142  |
| H    | -4.852707 | 1.692695  | 0.067809  |
| H    | 2.029739  | -2.120395 | -1.501421 |
| H    | 2.928481  | -0.465338 | 2.433431  |
| H    | 4.077138  | -1.518205 | 1.570850  |

### 1.65 m062x\_B-QC\_t

Gibbs free energy: -708.966112  
Electronic and ZPE: -708.924807

| Atom | X         | Y         | Z         |
|------|-----------|-----------|-----------|
| C    | 3.185190  | -0.161782 | -0.935193 |
| H    | 3.744435  | 0.123439  | -1.813602 |
| C    | 2.211548  | -1.344086 | -0.790325 |
| C    | 2.063639  | -1.515168 | 0.700663  |
| H    | 1.537476  | -2.382177 | 1.079236  |
| C    | 3.521918  | 0.245515  | 0.467800  |
| H    | 4.302812  | 0.975501  | 0.634929  |
| C    | 3.222364  | -0.877760 | 1.435163  |
| C    | 2.220709  | 0.724943  | -0.157826 |
| C    | 1.239650  | -0.470404 | -0.029900 |
| C    | -0.233918 | -0.399449 | -0.068448 |
| C    | -0.912055 | 0.657339  | 0.532165  |
| C    | -0.987511 | -1.405035 | -0.685326 |
| C    | -2.304777 | 0.722667  | 0.528070  |
| H    | -0.354537 | 1.454071  | 1.013771  |
| C    | -2.370101 | -1.360686 | -0.686041 |
| H    | -0.482376 | -2.230613 | -1.176828 |
| C    | -3.039404 | -0.293218 | -0.079977 |
| H    | -2.793388 | 1.565991  | 0.998165  |
| H    | -2.957218 | -2.136778 | -1.163313 |
| C    | 1.898405  | 2.086425  | -0.408313 |
| N    | 1.635797  | 3.190047  | -0.611482 |
| O    | -4.396354 | -0.330333 | -0.140729 |
| C    | -5.109289 | 0.739394  | 0.447910  |
| H    | -6.162804 | 0.523947  | 0.288444  |
| H    | -4.909481 | 0.803088  | 1.521309  |
| H    | -4.856191 | 1.690827  | -0.028093 |
| H    | 2.005855  | -2.103772 | -1.530590 |
| H    | 2.934947  | -0.507031 | 2.421250  |
| H    | 4.072506  | -1.556344 | 1.538997  |

### 1.66 m062x\_B-TS\_an

Gibbs free energy: -708.910690  
Electronic and ZPE: -708.869409

| Atom | X         | Y         | Z         |
|------|-----------|-----------|-----------|
| C    | -2.870349 | -0.662458 | 1.469220  |
| H    | -3.023436 | -0.521211 | 2.531914  |
| C    | -1.978183 | -1.542206 | 0.869554  |
| C    | -2.132885 | -1.347974 | -0.662518 |
| H    | -1.767216 | -2.137479 | -1.305140 |
| C    | -3.443728 | 0.205959  | 0.399489  |
| H    | -4.301386 | 0.816140  | 0.658921  |
| C    | -3.511522 | -0.720873 | -0.829413 |
| C    | -2.084970 | 0.908799  | 0.313361  |
| C    | -1.255544 | -0.321778 | -0.076041 |
| C    | 0.207195  | -0.334132 | -0.091517 |
| C    | 0.912158  | 0.749435  | 0.438592  |
| C    | 0.939228  | -1.406250 | -0.634071 |
| C    | 2.302999  | 0.781529  | 0.433981  |
| H    | 0.364171  | 1.582283  | 0.862608  |
| C    | 2.317068  | -1.389956 | -0.638502 |
| H    | 0.426515  | -2.263549 | -1.055488 |
| C    | 3.011882  | -0.293411 | -0.104149 |
| H    | 2.813349  | 1.640745  | 0.847945  |
| H    | 2.886282  | -2.212767 | -1.054688 |
| C    | -1.935887 | 2.119558  | -0.361201 |
| N    | -1.789215 | 3.171014  | -0.849227 |
| O    | 4.357809  | -0.367945 | -0.158984 |
| C    | 5.109673  | 0.713881  | 0.373192  |
| H    | 6.153918  | 0.449150  | 0.233098  |
| H    | 4.891184  | 1.640271  | -0.162526 |
| H    | 4.903838  | 0.844051  | 1.437939  |
| H    | -1.307015 | -2.233628 | 1.351956  |
| H    | -3.594082 | -0.151808 | -1.756688 |
| H    | -4.306912 | -1.466475 | -0.773245 |

**1.67 m062x\_B-TS\_ch**

Gibbs free energy: -708.896289  
Electronic and ZPE: -708.854951

| Atom | X         | Y         | Z         |
|------|-----------|-----------|-----------|
| C    | -2.862946 | -0.664633 | 1.463168  |
| H    | -2.993922 | -0.505030 | 2.525903  |
| C    | -2.003072 | -1.570669 | 0.863418  |
| C    | -2.131105 | -1.346397 | -0.666059 |
| H    | -1.766938 | -2.127044 | -1.321275 |
| C    | -3.434123 | 0.210580  | 0.396465  |
| H    | -4.288062 | 0.826455  | 0.655544  |
| C    | -3.507330 | -0.712422 | -0.836610 |
| C    | -2.076303 | 0.909035  | 0.319598  |
| C    | -1.253780 | -0.311077 | -0.095309 |
| C    | 0.203304  | -0.335017 | -0.096720 |
| C    | 0.905514  | 0.757351  | 0.420145  |
| C    | 0.936831  | -1.417378 | -0.618401 |
| C    | 2.295272  | 0.786140  | 0.420351  |
| H    | 0.352972  | 1.598308  | 0.821070  |
| C    | 2.313189  | -1.405161 | -0.614172 |
| H    | 0.423171  | -2.278750 | -1.031200 |
| C    | 3.005134  | -0.298927 | -0.094988 |
| H    | 2.805052  | 1.653997  | 0.816566  |
| H    | 2.887899  | -2.232218 | -1.013519 |
| C    | -1.919892 | 2.131238  | -0.344498 |
| N    | -1.767368 | 3.180944  | -0.826271 |
| O    | 4.349982  | -0.376904 | -0.142833 |
| C    | 5.100663  | 0.716784  | 0.356995  |
| H    | 6.144920  | 0.448897  | 0.221384  |
| H    | 4.880809  | 1.629276  | -0.202511 |
| H    | 4.898542  | 0.876461  | 1.419091  |
| H    | -1.313027 | -2.245318 | 1.343292  |
| H    | -3.582371 | -0.136493 | -1.760244 |
| H    | -4.305460 | -1.456593 | -0.787836 |

**1.68 m062x\_B-TS\_dcm**

Gibbs free energy: -708.907394  
Electronic and ZPE: -708.866090

| Atom | X         | Y         | Z         |
|------|-----------|-----------|-----------|
| C    | -2.865842 | -0.668181 | 1.467646  |
| H    | -3.012399 | -0.525179 | 2.530950  |
| C    | -1.980872 | -1.551358 | 0.864776  |
| C    | -2.130921 | -1.346440 | -0.666118 |
| H    | -1.765061 | -2.131531 | -1.314254 |
| C    | -3.440749 | 0.203912  | 0.401303  |
| H    | -4.298131 | 0.813645  | 0.662897  |
| C    | -3.509950 | -0.719060 | -0.830820 |
| C    | -2.083349 | 0.908028  | 0.317400  |
| C    | -1.254371 | -0.318594 | -0.081408 |
| C    | 0.206970  | -0.333192 | -0.093638 |
| C    | 0.911081  | 0.753871  | 0.430601  |
| C    | 0.939566  | -1.409151 | -0.628325 |
| C    | 2.301661  | 0.785133  | 0.427481  |
| H    | 0.362008  | 1.590026  | 0.846394  |
| C    | 2.316997  | -1.394018 | -0.630082 |
| H    | 0.426775  | -2.268442 | -1.045841 |
| C    | 3.010980  | -0.293793 | -0.101809 |
| H    | 2.811733  | 1.647752  | 0.834622  |
| H    | 2.887688  | -2.218882 | -1.039995 |
| C    | -1.937068 | 2.122198  | -0.354678 |
| N    | -1.794491 | 3.174164  | -0.840795 |
| O    | 4.356598  | -0.369596 | -0.153765 |
| C    | 5.108010  | 0.716570  | 0.368220  |
| H    | 6.152304  | 0.450448  | 0.230845  |
| H    | 4.889809  | 1.638105  | -0.176105 |
| H    | 4.902143  | 0.856796  | 1.431838  |
| H    | -1.303679 | -2.238962 | 1.344322  |
| H    | -3.592373 | -0.146223 | -1.755748 |
| H    | -4.305030 | -1.465480 | -0.777535 |

### 1.69 m062x\_B-TS\_m

Gibbs free energy: -708.910581

Electronic and ZPE: -708.869297

| Atom | X         | Y         | Z         |
|------|-----------|-----------|-----------|
| C    | -2.870169 | -0.662720 | 1.469159  |
| H    | -3.023024 | -0.521450 | 2.531880  |
| C    | -1.978242 | -1.542550 | 0.869345  |
| C    | -2.132798 | -1.347903 | -0.662680 |
| H    | -1.767113 | -2.137227 | -1.305524 |
| C    | -3.443620 | 0.205852  | 0.399577  |
| H    | -4.301277 | 0.815995  | 0.659109  |
| C    | -3.511458 | -0.720806 | -0.829467 |
| C    | -2.084920 | 0.908762  | 0.313535  |
| C    | -1.255495 | -0.321662 | -0.076230 |
| C    | 0.207196  | -0.334087 | -0.091593 |
| C    | 0.912129  | 0.749619  | 0.438279  |
| C    | 0.939251  | -1.406357 | -0.633837 |
| C    | 2.302961  | 0.781683  | 0.433720  |
| H    | 0.364107  | 1.582601  | 0.861977  |
| C    | 2.317076  | -1.390105 | -0.638172 |
| H    | 0.426537  | -2.263738 | -1.055094 |
| C    | 3.011861  | -0.293415 | -0.104064 |
| H    | 2.813301  | 1.641035  | 0.847415  |
| H    | 2.886341  | -2.213002 | -1.054113 |
| C    | -1.935987 | 2.119647  | -0.360941 |
| N    | -1.789521 | 3.171131  | -0.848898 |
| O    | 4.357778  | -0.367998 | -0.158790 |
| C    | 5.109625  | 0.714001  | 0.372995  |
| H    | 6.153872  | 0.449216  | 0.233008  |
| H    | 4.891146  | 1.640203  | -0.163058 |
| H    | 4.903785  | 0.844558  | 1.437699  |
| H    | -1.306853 | -2.233848 | 1.351621  |
| H    | -3.594028 | -0.151582 | -1.756642 |
| H    | -4.306828 | -1.466450 | -0.773419 |

### 1.70 m062x\_B-TS\_t

Gibbs free energy: -708.898073

Electronic and ZPE: -708.856746

| Atom | X         | Y         | Z         |
|------|-----------|-----------|-----------|
| C    | -2.862325 | -0.667008 | 1.463949  |
| H    | -2.995175 | -0.510894 | 2.527010  |
| C    | -1.998362 | -1.568445 | 0.862508  |
| C    | -2.130590 | -1.346004 | -0.666984 |
| H    | -1.766035 | -2.126561 | -1.321963 |
| C    | -3.434862 | 0.208466  | 0.398273  |
| H    | -4.289545 | 0.822748  | 0.658584  |
| C    | -3.507617 | -0.713533 | -0.835406 |
| C    | -2.077526 | 0.908623  | 0.320148  |
| C    | -1.253612 | -0.312023 | -0.093442 |
| C    | 0.204102  | -0.334334 | -0.096639 |
| C    | 0.906530  | 0.757588  | 0.420652  |
| C    | 0.937564  | -1.416052 | -0.619576 |
| C    | 2.296406  | 0.786767  | 0.420478  |
| H    | 0.354488  | 1.598145  | 0.823122  |
| C    | 2.314066  | -1.403426 | -0.616050 |
| H    | 0.424098  | -2.277368 | -1.032649 |
| C    | 3.006269  | -0.297765 | -0.096058 |
| H    | 2.806178  | 1.654175  | 0.817677  |
| H    | 2.888226  | -2.230396 | -1.016424 |
| C    | -1.924309 | 2.129731  | -0.345358 |
| N    | -1.775194 | 3.180067  | -0.827779 |
| O    | 4.351199  | -0.375531 | -0.144101 |
| C    | 5.101938  | 0.717369  | 0.358607  |
| H    | 6.146216  | 0.449538  | 0.223317  |
| H    | 4.882622  | 1.630835  | -0.199373 |
| H    | 4.898834  | 0.874832  | 1.420764  |
| H    | -1.309751 | -2.245166 | 1.341499  |
| H    | -3.584506 | -0.137360 | -1.758726 |
| H    | -4.304924 | -1.458467 | -0.786206 |

**1.71 m062x\_C-NBD\_an**

Gibbs free energy: -783.081820  
Electronic and ZPE: -783.039439

| Atom | X         | Y         | Z         |
|------|-----------|-----------|-----------|
| C    | 3.457927  | -0.742919 | 1.306372  |
| H    | 4.281219  | -1.434450 | 1.482557  |
| H    | 3.158483  | -0.248101 | 2.231030  |
| C    | 2.276240  | -1.403930 | 0.549689  |
| H    | 1.746923  | -2.215931 | 1.041501  |
| C    | 3.737048  | 0.244537  | 0.145500  |
| H    | 4.540991  | 0.966647  | 0.256918  |
| C    | 1.435636  | -0.143263 | 0.280305  |
| C    | 2.320688  | 0.844819  | 0.041298  |
| C    | 2.994534  | -1.744308 | -0.767643 |
| H    | 2.763544  | -2.604486 | -1.381523 |
| C    | 3.862853  | -0.764801 | -1.007764 |
| H    | 4.510129  | -0.635641 | -1.864479 |
| C    | 2.055568  | 2.168687  | -0.388023 |
| N    | 1.873652  | 3.252545  | -0.738981 |
| C    | -0.024773 | -0.129765 | 0.208799  |
| C    | -0.706305 | -1.297396 | -0.161355 |
| C    | -0.761642 | 1.026822  | 0.498533  |
| C    | -2.088452 | -1.301048 | -0.264804 |
| H    | -0.149706 | -2.200478 | -0.385347 |
| C    | -2.144751 | 1.021046  | 0.404784  |
| H    | -0.252745 | 1.927593  | 0.820289  |
| C    | -2.811957 | -0.142887 | 0.017786  |
| H    | -2.616658 | -2.199121 | -0.561613 |
| H    | -2.707713 | 1.916064  | 0.637125  |
| C    | -4.294085 | -0.192232 | -0.098643 |
| O    | -4.919827 | -1.168450 | -0.432441 |
| O    | -4.880395 | 0.971484  | 0.207054  |
| H    | -5.839421 | 0.875647  | 0.110494  |

**1.72 m062x\_C-NBD\_ch**

Gibbs free energy: -783.072739  
Electronic and ZPE: -783.030492

| Atom | X         | Y         | Z         |
|------|-----------|-----------|-----------|
| C    | 3.456854  | -0.760974 | 1.296451  |
| H    | 4.278443  | -1.456669 | 1.465662  |
| H    | 3.159837  | -0.272107 | 2.225226  |
| C    | 2.271762  | -1.410784 | 0.536249  |
| H    | 1.741550  | -2.223951 | 1.025910  |
| C    | 3.735933  | 0.234507  | 0.142867  |
| H    | 4.542383  | 0.953635  | 0.258554  |
| C    | 1.433801  | -0.144581 | 0.276477  |
| C    | 2.322170  | 0.841525  | 0.045170  |
| C    | 2.988347  | -1.745971 | -0.782967 |
| H    | 2.755842  | -2.598734 | -1.406495 |
| C    | 3.858167  | -0.766994 | -1.017494 |
| H    | 4.500855  | -0.633026 | -1.876773 |
| C    | 2.070062  | 2.176003  | -0.361950 |
| N    | 1.901661  | 3.269212  | -0.687791 |
| C    | -0.026504 | -0.128804 | 0.205764  |
| C    | -0.712550 | -1.302375 | -0.136250 |
| C    | -0.760576 | 1.036466  | 0.465518  |
| C    | -2.094437 | -1.306602 | -0.237303 |
| H    | -0.157780 | -2.210895 | -0.342464 |
| C    | -2.143535 | 1.031274  | 0.373016  |
| H    | -0.248590 | 1.945957  | 0.756015  |
| C    | -2.813876 | -0.140316 | 0.017924  |
| H    | -2.629668 | -2.207651 | -0.512326 |
| H    | -2.706206 | 1.933033  | 0.578631  |
| C    | -4.295710 | -0.192391 | -0.096870 |
| O    | -4.924191 | -1.172844 | -0.402010 |
| O    | -4.881948 | 0.984078  | 0.177495  |
| H    | -5.838622 | 0.876155  | 0.079110  |

### 1.73 m062x\_C-NBD\_dcm

Gibbs free energy: -783.079745

Electronic and ZPE: -783.037436

| Atom | X         | Y         | Z         |
|------|-----------|-----------|-----------|
| C    | 3.457974  | -0.747592 | 1.303608  |
| H    | 4.280676  | -1.440435 | 1.477716  |
| H    | 3.159875  | -0.253985 | 2.229394  |
| C    | 2.274773  | -1.405516 | 0.546847  |
| H    | 1.745179  | -2.217457 | 1.038653  |
| C    | 3.736829  | 0.241536  | 0.144210  |
| H    | 4.541767  | 0.962585  | 0.256115  |
| C    | 1.435142  | -0.143281 | 0.279898  |
| C    | 2.321248  | 0.843965  | 0.042198  |
| C    | 2.991700  | -1.745100 | -0.771353 |
| H    | 2.759677  | -2.603391 | -1.387459 |
| C    | 3.860683  | -0.766126 | -1.010711 |
| H    | 4.506327  | -0.636114 | -1.868488 |
| C    | 2.059673  | 2.170538  | -0.381740 |
| N    | 1.881788  | 3.256990  | -0.726200 |
| C    | -0.025230 | -0.129147 | 0.208617  |
| C    | -0.707635 | -1.298394 | -0.154777 |
| C    | -0.761549 | 1.029574  | 0.490782  |
| C    | -2.089689 | -1.302396 | -0.257830 |
| H    | -0.151167 | -2.202610 | -0.374625 |
| C    | -2.144600 | 1.023782  | 0.397136  |
| H    | -0.252041 | 1.932756  | 0.804642  |
| C    | -2.812376 | -0.142238 | 0.017978  |
| H    | -2.619379 | -2.201303 | -0.549564 |
| H    | -2.707584 | 1.920556  | 0.622558  |
| C    | -4.294400 | -0.192230 | -0.098369 |
| O    | -4.920777 | -1.169734 | -0.424973 |
| O    | -4.880711 | 0.974709  | 0.199206  |
| H    | -5.839203 | 0.876420  | 0.101636  |

### 1.74 m062x\_C-NBD\_m

Gibbs free energy: -783.081750

Electronic and ZPE: -783.039372

| Atom | X         | Y         | Z         |
|------|-----------|-----------|-----------|
| C    | 3.457935  | -0.743093 | 1.306265  |
| H    | 4.281204  | -1.434676 | 1.482368  |
| H    | 3.158553  | -0.248317 | 2.230967  |
| C    | 2.276182  | -1.403986 | 0.549593  |
| H    | 1.746855  | -2.215981 | 1.041410  |
| C    | 3.737041  | 0.244421  | 0.145444  |
| H    | 4.541027  | 0.966488  | 0.256871  |
| C    | 1.435619  | -0.143259 | 0.280301  |
| C    | 2.320712  | 0.844789  | 0.041335  |
| C    | 2.994410  | -1.744339 | -0.767779 |
| H    | 2.763368  | -2.604447 | -1.381738 |
| C    | 3.862757  | -0.764857 | -1.007882 |
| H    | 4.509966  | -0.635670 | -1.864642 |
| C    | 2.055723  | 2.168753  | -0.387796 |
| N    | 1.873959  | 3.252707  | -0.738522 |
| C    | -0.024789 | -0.129737 | 0.208803  |
| C    | -0.706349 | -1.297428 | -0.161110 |
| C    | -0.761641 | 1.026926  | 0.498262  |
| C    | -2.088492 | -1.301095 | -0.264550 |
| H    | -0.149750 | -2.200550 | -0.384953 |
| C    | -2.144748 | 1.021148  | 0.404513  |
| H    | -0.252726 | 1.927787  | 0.819735  |
| C    | -2.811971 | -0.142863 | 0.017795  |
| H    | -2.616746 | -2.199201 | -0.561180 |
| H    | -2.707711 | 1.916230  | 0.636602  |
| C    | -4.294095 | -0.192231 | -0.098636 |
| O    | -4.919858 | -1.168501 | -0.432173 |
| O    | -4.880405 | 0.971602  | 0.206760  |
| H    | -5.839413 | 0.875685  | 0.110157  |

**1.75 m062x\_C-NBD\_t**

Gibbs free energy: -783.073883  
Electronic and ZPE: -783.031632

| Atom | X         | Y         | Z         |
|------|-----------|-----------|-----------|
| C    | 3.457182  | -0.758742 | 1.297503  |
| H    | 4.278948  | -1.453996 | 1.467434  |
| H    | 3.160213  | -0.268957 | 2.225794  |
| C    | 2.272213  | -1.409904 | 0.538177  |
| H    | 1.742138  | -2.222730 | 1.028475  |
| C    | 3.736047  | 0.235518  | 0.142771  |
| H    | 4.542348  | 0.954897  | 0.257566  |
| C    | 1.434000  | -0.144334 | 0.277151  |
| C    | 2.322011  | 0.841915  | 0.044703  |
| C    | 2.988574  | -1.746088 | -0.780953 |
| H    | 2.756044  | -2.599812 | -1.403155 |
| C    | 3.858148  | -0.767118 | -1.016655 |
| H    | 4.501031  | -0.633894 | -1.875917 |
| C    | 2.068491  | 2.175171  | -0.365140 |
| N    | 1.898990  | 3.267360  | -0.694059 |
| C    | -0.026308 | -0.128819 | 0.206402  |
| C    | -0.711748 | -1.301712 | -0.139109 |
| C    | -0.760752 | 1.035391  | 0.469792  |
| C    | -2.093658 | -1.305930 | -0.240514 |
| H    | -0.156642 | -2.209491 | -0.347643 |
| C    | -2.143722 | 1.030104  | 0.377047  |
| H    | -0.249173 | 1.943930  | 0.764006  |
| C    | -2.813637 | -0.140620 | 0.018032  |
| H    | -2.627948 | -2.206658 | -0.518323 |
| H    | -2.706433 | 1.931115  | 0.585743  |
| C    | -4.295486 | -0.192309 | -0.097179 |
| O    | -4.923625 | -1.172315 | -0.405866 |
| O    | -4.881736 | 0.982636  | 0.180858  |
| H    | -5.838694 | 0.876388  | 0.082317  |

**1.76 m062x\_C-QC\_an**

Gibbs free energy: -783.055325  
Electronic and ZPE: -783.012868

| Atom | X         | Y         | Z         |
|------|-----------|-----------|-----------|
| C    | 3.445374  | -0.990435 | 1.409175  |
| H    | 4.253297  | -1.719300 | 1.504998  |
| H    | 3.187507  | -0.605573 | 2.397412  |
| C    | 2.247923  | -1.561180 | 0.682118  |
| H    | 1.672416  | -2.393791 | 1.065754  |
| C    | 3.805945  | 0.112690  | 0.440406  |
| H    | 4.632801  | 0.791513  | 0.600031  |
| C    | 1.478612  | -0.457696 | -0.031076 |
| C    | 2.527103  | 0.674677  | -0.166814 |
| C    | 2.387308  | -1.391942 | -0.804258 |
| H    | 2.118596  | -2.128247 | -1.547747 |
| C    | 3.428340  | -0.270011 | -0.957036 |
| H    | 3.989185  | -0.015312 | -1.843468 |
| C    | 2.291281  | 2.049365  | -0.430713 |
| N    | 2.094698  | 3.163726  | -0.652536 |
| C    | 0.014407  | -0.320432 | -0.033279 |
| C    | -0.791912 | -1.344033 | -0.546656 |
| C    | -0.594456 | 0.819637  | 0.501804  |
| C    | -2.172159 | -1.233663 | -0.515971 |
| H    | -0.332637 | -2.227797 | -0.976632 |
| C    | -1.977693 | 0.936276  | 0.525396  |
| H    | 0.013930  | 1.618761  | 0.910304  |
| C    | -2.773090 | -0.091383 | 0.017387  |
| H    | -2.796414 | -2.025617 | -0.912551 |
| H    | -2.439405 | 1.822833  | 0.941728  |
| C    | -4.254549 | -0.010276 | 0.022318  |
| O    | -4.990364 | -0.868400 | -0.403106 |
| O    | -4.716198 | 1.129631  | 0.555769  |
| H    | -5.684266 | 1.117040  | 0.529818  |

### 1.77 m062x\_C-QC\_ch

Gibbs free energy: -783.045316  
Electronic and ZPE: -783.003069

| Atom | X         | Y         | Z         |
|------|-----------|-----------|-----------|
| C    | 3.441854  | -1.028677 | 1.388857  |
| H    | 4.243161  | -1.767033 | 1.469248  |
| H    | 3.191457  | -0.658103 | 2.384729  |
| C    | 2.234922  | -1.574091 | 0.658108  |
| H    | 1.651120  | -2.405119 | 1.032995  |
| C    | 3.806165  | 0.088187  | 0.437264  |
| H    | 4.638557  | 0.758355  | 0.605715  |
| C    | 1.474435  | -0.453196 | -0.035361 |
| C    | 2.533761  | 0.670869  | -0.160469 |
| C    | 2.371859  | -1.383846 | -0.826407 |
| H    | 2.091144  | -2.104550 | -1.580886 |
| C    | 3.421695  | -0.268570 | -0.966943 |
| H    | 3.984890  | -0.008632 | -1.850487 |
| C    | 2.318044  | 2.057637  | -0.390191 |
| N    | 2.146678  | 3.181192  | -0.579252 |
| C    | 0.009678  | -0.311587 | -0.036047 |
| C    | -0.796911 | -1.356558 | -0.503446 |
| C    | -0.597612 | 0.848572  | 0.452099  |
| C    | -2.176581 | -1.248667 | -0.472052 |
| H    | -0.336869 | -2.255884 | -0.900090 |
| C    | -1.981352 | 0.962829  | 0.476236  |
| H    | 0.010718  | 1.668624  | 0.816213  |
| C    | -2.775863 | -0.086449 | 0.016696  |
| H    | -2.805682 | -2.054058 | -0.832546 |
| H    | -2.445591 | 1.865787  | 0.852585  |
| C    | -4.257884 | -0.011284 | 0.023271  |
| O    | -4.992698 | -0.885573 | -0.360646 |
| O    | -4.722055 | 1.152433  | 0.511328  |
| H    | -5.688870 | 1.126382  | 0.482146  |

### 1.78 m062x\_C-QC\_dcm

Gibbs free energy: -783.053089  
Electronic and ZPE: -783.010687

| Atom | X         | Y         | Z         |
|------|-----------|-----------|-----------|
| C    | 3.443256  | -1.004669 | 1.402403  |
| H    | 4.248742  | -1.736982 | 1.492921  |
| H    | 3.187608  | -0.625162 | 2.393343  |
| C    | 2.242878  | -1.566248 | 0.673065  |
| H    | 1.664192  | -2.398493 | 1.052833  |
| C    | 3.806110  | 0.103497  | 0.440220  |
| H    | 4.635165  | 0.778814  | 0.603611  |
| C    | 1.476952  | -0.455886 | -0.032756 |
| C    | 2.529445  | 0.673438  | -0.163520 |
| C    | 2.381872  | -1.388760 | -0.812383 |
| H    | 2.109119  | -2.118929 | -1.560491 |
| C    | 3.426414  | -0.269421 | -0.959663 |
| H    | 3.987932  | -0.012118 | -1.844943 |
| C    | 2.301613  | 2.052154  | -0.416649 |
| N    | 2.114980  | 3.169918  | -0.628530 |
| C    | 0.012716  | -0.317116 | -0.034329 |
| C    | -0.793718 | -1.348558 | -0.531651 |
| C    | -0.595855 | 0.830075  | 0.484638  |
| C    | -2.173777 | -1.239021 | -0.500825 |
| H    | -0.334194 | -2.238028 | -0.949688 |
| C    | -1.979255 | 0.945852  | 0.508441  |
| H    | 0.012289  | 1.636549  | 0.878566  |
| C    | -2.774420 | -0.089582 | 0.017001  |
| H    | -2.799060 | -2.036294 | -0.884992 |
| H    | -2.441551 | 1.838343  | 0.911215  |
| C    | -4.255965 | -0.010116 | 0.022514  |
| O    | -4.991607 | -0.873889 | -0.389789 |
| O    | -4.718226 | 1.137295  | 0.541487  |
| H    | -5.686034 | 1.121781  | 0.514704  |



### 1.79 m062x\_C-QC\_m

Gibbs free energy: -783.055251  
Electronic and ZPE: -783.012796

| Atom | X         | Y         | Z         |
|------|-----------|-----------|-----------|
| C    | 3.445277  | -0.990995 | 1.408923  |
| H    | 4.253102  | -1.719997 | 1.504546  |
| H    | 3.187492  | -0.606339 | 2.397263  |
| C    | 2.247716  | -1.561381 | 0.681766  |
| H    | 1.672082  | -2.393977 | 1.065246  |
| C    | 3.805953  | 0.112323  | 0.440411  |
| H    | 4.632900  | 0.791001  | 0.600186  |
| C    | 1.478545  | -0.457622 | -0.031146 |
| C    | 2.527197  | 0.674627  | -0.166678 |
| C    | 2.387096  | -1.391821 | -0.804572 |
| H    | 2.118233  | -2.127886 | -1.548244 |
| C    | 3.428270  | -0.269995 | -0.957126 |
| H    | 3.989144  | -0.015194 | -1.843512 |
| C    | 2.291701  | 2.049470  | -0.430175 |
| N    | 2.095520  | 3.163970  | -0.651623 |
| C    | 0.014340  | -0.320298 | -0.033325 |
| C    | -0.791984 | -1.344209 | -0.546081 |
| C    | -0.594513 | 0.820051  | 0.501136  |
| C    | -2.172224 | -1.233873 | -0.515389 |
| H    | -0.332700 | -2.228198 | -0.975596 |
| C    | -1.977757 | 0.936656  | 0.524738  |
| H    | 0.013861  | 1.619462  | 0.909083  |
| C    | -2.773147 | -0.091310 | 0.017369  |
| H    | -2.796511 | -2.026042 | -0.911489 |
| H    | -2.439488 | 1.823447  | 0.940549  |
| C    | -4.254608 | -0.010267 | 0.022327  |
| O    | -4.990420 | -0.868609 | -0.402602 |
| O    | -4.716278 | 1.129928  | 0.555228  |
| H    | -5.684338 | 1.117244  | 0.529251  |

### 1.80 m062x\_C-QC\_t

Gibbs free energy: -783.046572  
Electronic and ZPE: -783.004319

| Atom | X         | Y         | Z         |
|------|-----------|-----------|-----------|
| C    | 3.441879  | -1.026034 | 1.390455  |
| H    | 4.243695  | -1.763659 | 1.472013  |
| H    | 3.190776  | -0.654537 | 2.385770  |
| C    | 2.235824  | -1.573329 | 0.659656  |
| H    | 1.652616  | -2.404570 | 1.034953  |
| C    | 3.806174  | 0.089901  | 0.437771  |
| H    | 4.638210  | 0.760591  | 0.605795  |
| C    | 1.474688  | -0.453515 | -0.035083 |
| C    | 2.533174  | 0.671200  | -0.160512 |
| C    | 2.373062  | -1.384314 | -0.824898 |
| H    | 2.093332  | -2.105913 | -1.578862 |
| C    | 3.422292  | -0.268536 | -0.965936 |
| H    | 3.985133  | -0.008601 | -1.849691 |
| C    | 2.316256  | 2.056979  | -0.393260 |
| N    | 2.143413  | 3.179892  | -0.585399 |
| C    | 0.010030  | -0.312277 | -0.035822 |
| C    | -0.796562 | -1.355693 | -0.506775 |
| C    | -0.597452 | 0.846362  | 0.456063  |
| C    | -2.176280 | -1.247580 | -0.475473 |
| H    | -0.336602 | -2.253904 | -0.905911 |
| C    | -1.981142 | 0.960828  | 0.480153  |
| H    | 0.010832  | 1.664804  | 0.823900  |
| C    | -2.775770 | -0.086835 | 0.016742  |
| H    | -2.804789 | -2.052122 | -0.838839 |
| H    | -2.445053 | 1.862613  | 0.859705  |
| C    | -4.257715 | -0.010992 | 0.023173  |
| O    | -4.992692 | -0.884105 | -0.364284 |
| O    | -4.721586 | 1.150686  | 0.514955  |
| H    | -5.688571 | 1.126420  | 0.486063  |

### 1.81 m062x\_C-TS\_an

Gibbs free energy: -782.988941  
Electronic and ZPE: -782.947115

| Atom | X         | Y         | Z         |
|------|-----------|-----------|-----------|
| C    | -3.589350 | -1.158560 | -1.098488 |
| H    | -4.352102 | -1.916047 | -0.914186 |
| H    | -3.547030 | -0.910183 | -2.158272 |
| C    | -2.230022 | -1.577197 | -0.546433 |
| H    | -1.684870 | -2.439155 | -0.906559 |
| C    | -3.761770 | 0.094540  | -0.230104 |
| H    | -4.680275 | 0.666641  | -0.281963 |
| C    | -1.511402 | -0.329882 | -0.207897 |
| C    | -2.431243 | 0.857041  | -0.464037 |
| C    | -2.311114 | -1.337087 | 0.960483  |
| H    | -1.705785 | -1.774361 | 1.736332  |
| C    | -3.286953 | -0.349520 | 1.108010  |
| H    | -3.531102 | 0.153110  | 2.037914  |
| C    | -2.237617 | 2.074463  | 0.197283  |
| N    | -2.080914 | 3.131782  | 0.665375  |
| C    | -0.047224 | -0.256919 | -0.090635 |
| C    | 0.718338  | -1.373402 | 0.278895  |
| C    | 0.600040  | 0.935263  | -0.430176 |
| C    | 2.097800  | -1.293252 | 0.314278  |
| H    | 0.237634  | -2.308400 | 0.543814  |
| C    | 1.988195  | 1.010723  | -0.407979 |
| H    | 0.024018  | 1.801579  | -0.727739 |
| C    | 2.737919  | -0.099339 | -0.029631 |
| H    | 2.692227  | -2.151117 | 0.603890  |
| H    | 2.483779  | 1.934206  | -0.678768 |
| C    | 4.225429  | -0.059293 | 0.021915  |
| O    | 4.919238  | -0.991467 | 0.345115  |
| O    | 4.727041  | 1.129341  | -0.331139 |
| H    | 5.693509  | 1.092770  | -0.276805 |

### 1.82 m062x\_C-TS\_ch

Gibbs free energy: -782.973034  
Electronic and ZPE: -782.931341

| Atom | X         | Y         | Z         |
|------|-----------|-----------|-----------|
| C    | -3.593806 | -1.180429 | -1.071015 |
| H    | -4.356784 | -1.934088 | -0.869197 |
| H    | -3.552876 | -0.950563 | -2.135046 |
| C    | -2.232547 | -1.589540 | -0.513527 |
| H    | -1.689659 | -2.451576 | -0.878008 |
| C    | -3.759177 | 0.090464  | -0.230021 |
| H    | -4.674251 | 0.667736  | -0.286408 |
| C    | -1.511113 | -0.328676 | -0.224767 |
| C    | -2.430334 | 0.846903  | -0.476004 |
| C    | -2.320983 | -1.347869 | 0.990094  |
| H    | -1.682807 | -1.738163 | 1.764317  |
| C    | -3.249970 | -0.307390 | 1.107248  |
| H    | -3.442235 | 0.257577  | 2.013127  |
| C    | -2.235581 | 2.076717  | 0.171944  |
| N    | -2.082546 | 3.129957  | 0.642365  |
| C    | -0.049943 | -0.255324 | -0.101549 |
| C    | 0.716034  | -1.377843 | 0.251737  |
| C    | 0.595704  | 0.943109  | -0.420234 |
| C    | 2.094404  | -1.298951 | 0.291394  |
| H    | 0.232718  | -2.315702 | 0.503345  |
| C    | 1.984226  | 1.017377  | -0.393383 |
| H    | 0.018493  | 1.814459  | -0.699597 |
| C    | 2.732605  | -0.098236 | -0.032660 |
| H    | 2.694368  | -2.157396 | 0.568160  |
| H    | 2.482176  | 1.945079  | -0.644724 |
| C    | 4.220396  | -0.062160 | 0.023970  |
| O    | 4.912112  | -0.996305 | 0.335933  |
| O    | 4.725282  | 1.133573  | -0.313384 |
| H    | 5.690023  | 1.085877  | -0.252286 |

### 1.83 m062x\_C-TS\_dcm

Gibbs free energy: -782.985274

Electronic and ZPE: -782.943476

| Atom | X         | Y         | Z         |
|------|-----------|-----------|-----------|
| C    | -3.589571 | -1.164487 | -1.092363 |
| H    | -4.352290 | -1.921304 | -0.904190 |
| H    | -3.547192 | -0.920579 | -2.153156 |
| C    | -2.229865 | -1.580425 | -0.538568 |
| H    | -1.684634 | -2.442024 | -0.899675 |
| C    | -3.760859 | 0.092977  | -0.230668 |
| H    | -4.678739 | 0.665974  | -0.284047 |
| C    | -1.511053 | -0.329493 | -0.211804 |
| C    | -2.431010 | 0.854590  | -0.467804 |
| C    | -2.313107 | -1.339536 | 0.967408  |
| H    | -1.700248 | -1.765272 | 1.743683  |
| C    | -3.278387 | -0.339809 | 1.107837  |
| H    | -3.510204 | 0.178265  | 2.032387  |
| C    | -2.238149 | 2.074750  | 0.191016  |
| N    | -2.083728 | 3.131106  | 0.660134  |
| C    | -0.047693 | -0.256405 | -0.092613 |
| C    | 0.718034  | -1.374433 | 0.272770  |
| C    | 0.598981  | 0.937446  | -0.426837 |
| C    | 2.097211  | -1.294476 | 0.309031  |
| H    | 0.236827  | -2.310281 | 0.534418  |
| C    | 1.987227  | 1.012673  | -0.403825 |
| H    | 0.022566  | 1.805001  | -0.719747 |
| C    | 2.736726  | -0.098801 | -0.030113 |
| H    | 2.693074  | -2.152485 | 0.595342  |
| H    | 2.483206  | 1.937333  | -0.669787 |
| C    | 4.224328  | -0.059589 | 0.022264  |
| O    | 4.917713  | -0.992090 | 0.343376  |
| O    | 4.726559  | 1.130352  | -0.328154 |
| H    | 5.692677  | 1.091631  | -0.272337 |

### 1.84 m062x\_C-TS\_m

Gibbs free energy: -782.988818

Electronic and ZPE: -782.946992

| Atom | X         | Y         | Z         |
|------|-----------|-----------|-----------|
| C    | -3.589340 | -1.158762 | -1.098304 |
| H    | -4.352089 | -1.916232 | -0.913886 |
| H    | -3.547006 | -0.910527 | -2.158119 |
| C    | -2.230001 | -1.577305 | -0.546180 |
| H    | -1.684834 | -2.439241 | -0.906344 |
| C    | -3.761735 | 0.094478  | -0.230137 |
| H    | -4.680223 | 0.666604  | -0.282052 |
| C    | -1.511386 | -0.329865 | -0.208026 |
| C    | -2.431235 | 0.856960  | -0.464166 |
| C    | -2.311182 | -1.337180 | 0.960704  |
| H    | -1.705602 | -1.774064 | 1.736574  |
| C    | -3.286671 | -0.349208 | 1.107995  |
| H    | -3.530409 | 0.153943  | 2.037725  |
| C    | -2.237650 | 2.074469  | 0.197083  |
| N    | -2.081041 | 3.131753  | 0.665221  |
| C    | -0.047238 | -0.256895 | -0.090686 |
| C    | 0.718329  | -1.373428 | 0.278712  |
| C    | 0.600004  | 0.935343  | -0.430052 |
| C    | 2.097782  | -1.293285 | 0.314122  |
| H    | 0.237608  | -2.308453 | 0.543531  |
| C    | 1.988162  | 1.010794  | -0.407835 |
| H    | 0.023968  | 1.801699  | -0.727460 |
| C    | 2.737879  | -0.099315 | -0.029640 |
| H    | 2.692258  | -2.151152 | 0.603627  |
| H    | 2.483759  | 1.934315  | -0.678467 |
| C    | 4.225393  | -0.059300 | 0.021923  |
| O    | 4.919187  | -0.991479 | 0.345071  |
| O    | 4.727026  | 1.129367  | -0.331079 |
| H    | 5.693483  | 1.092725  | -0.276700 |

## 1.85 m062x\_C-TS\_t

Gibbs free energy: -782.974969

Electronic and ZPE: -782.933274

| Atom | X         | Y         | Z         |
|------|-----------|-----------|-----------|
| C    | -3.593048 | -1.178204 | -1.074225 |
| H    | -4.355993 | -1.932362 | -0.874444 |
| H    | -3.551876 | -0.946305 | -2.137786 |
| C    | -2.232023 | -1.588263 | -0.517281 |
| H    | -1.688687 | -2.450206 | -0.881166 |
| C    | -3.759319 | 0.090769  | -0.230214 |
| H    | -4.674863 | 0.667317  | -0.286257 |
| C    | -1.511021 | -0.328818 | -0.222809 |
| C    | -2.430394 | 0.848103  | -0.475272 |
| C    | -2.319546 | -1.346311 | 0.986619  |
| H    | -1.685437 | -1.742023 | 1.761483  |
| C    | -3.254382 | -0.312308 | 1.107479  |
| H    | -3.452623 | 0.245757  | 2.016357  |
| C    | -2.236191 | 2.076270  | 0.174778  |
| N    | -2.083431 | 3.129934  | 0.645286  |
| C    | -0.049538 | -0.255554 | -0.100152 |
| C    | 0.716434  | -1.377389 | 0.254977  |
| C    | 0.596199  | 0.942202  | -0.421222 |
| C    | 2.094917  | -1.298268 | 0.294102  |
| H    | 0.233513  | -2.314998 | 0.508148  |
| C    | 1.984676  | 1.016679  | -0.394993 |
| H    | 0.019072  | 1.812934  | -0.702691 |
| C    | 2.733264  | -0.098279 | -0.032284 |
| H    | 2.694284  | -2.156626 | 0.572333  |
| H    | 2.482243  | 1.943975  | -0.648554 |
| C    | 4.221031  | -0.061604 | 0.023724  |
| O    | 4.913040  | -0.995457 | 0.337275  |
| O    | 4.725415  | 1.133172  | -0.315816 |
| H    | 5.690393  | 1.087132  | -0.255456 |

## 2 Imaginary frequencies and reduced masses

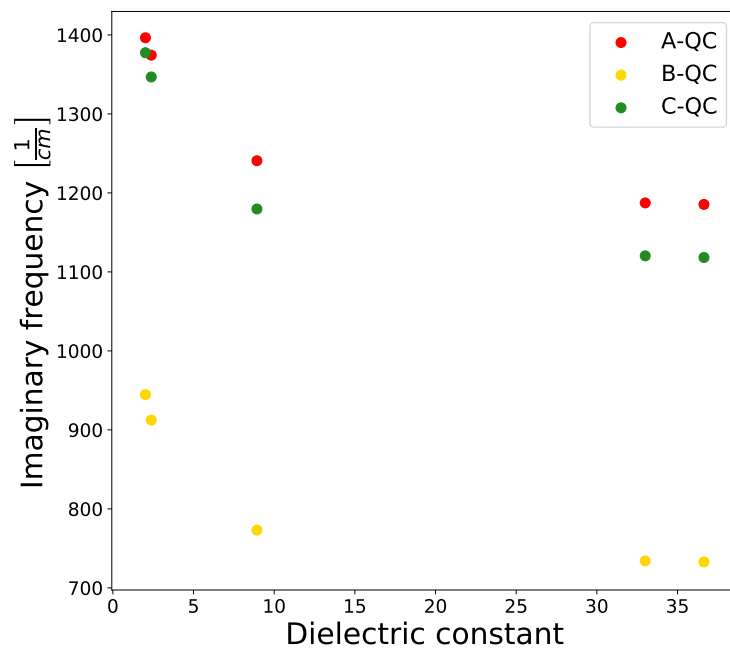

Figure 1: Imaginary frequency as a function of the dielectric constant for the NBD/QC systems.

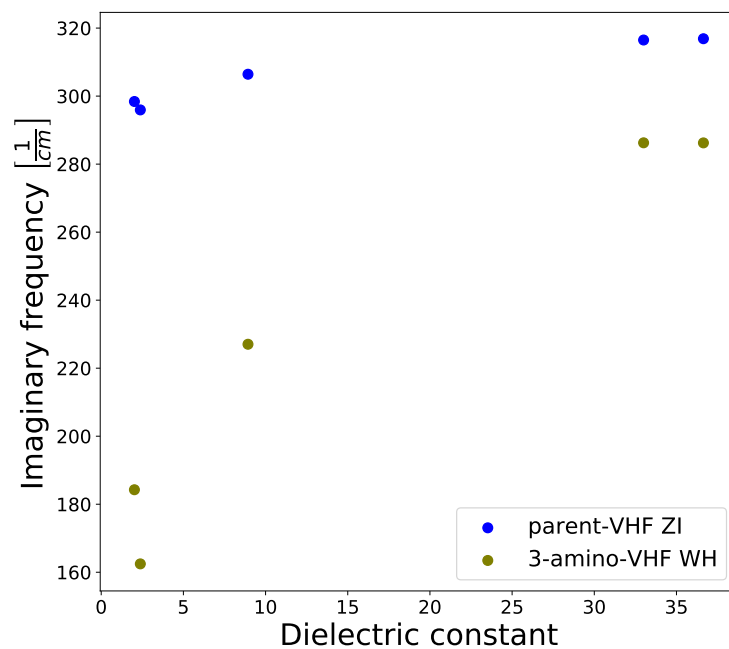

Figure 2: Imaginary frequency as a function of the dielectric constant for the DHA/VHF systems.

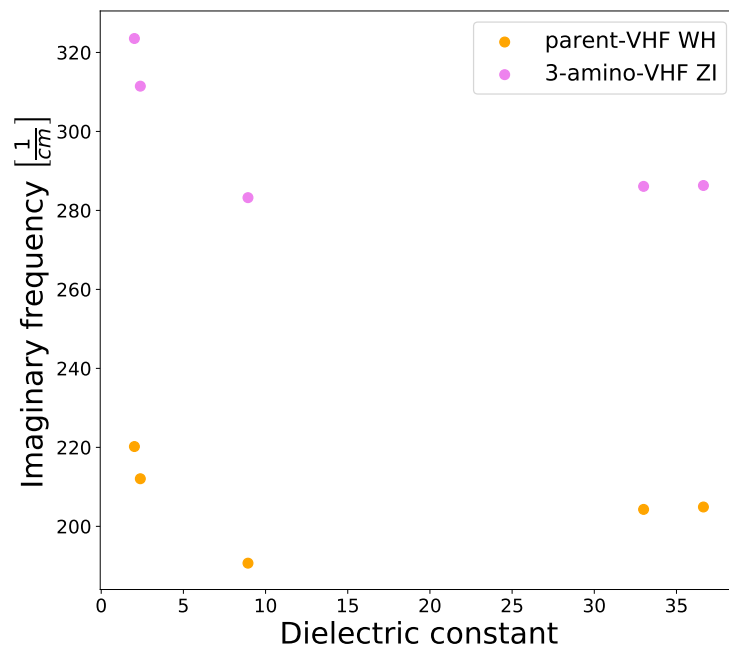

Figure 3: Imaginary frequency as a function of the dielectric constant for the DHA/VHF systems.

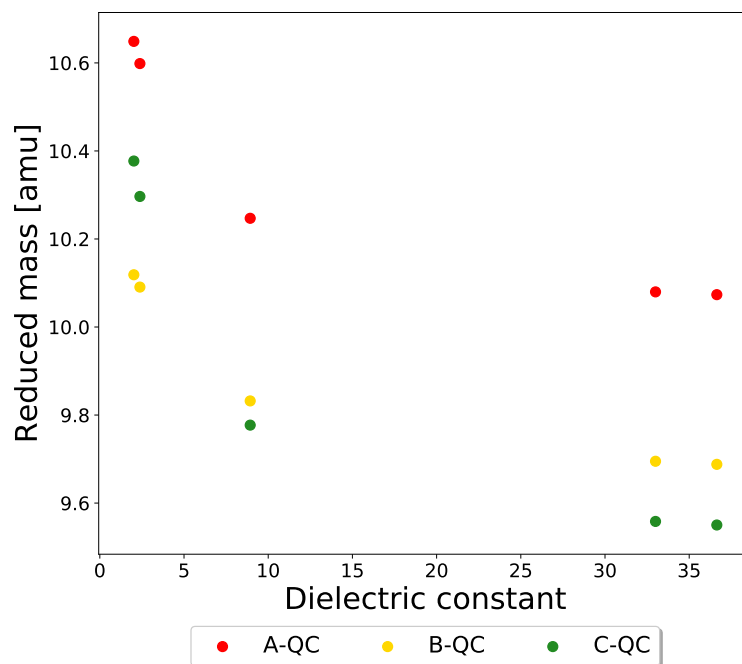

Figure 4: Reduced mass as a function of the dielectric constant for the NBD/QC systems.

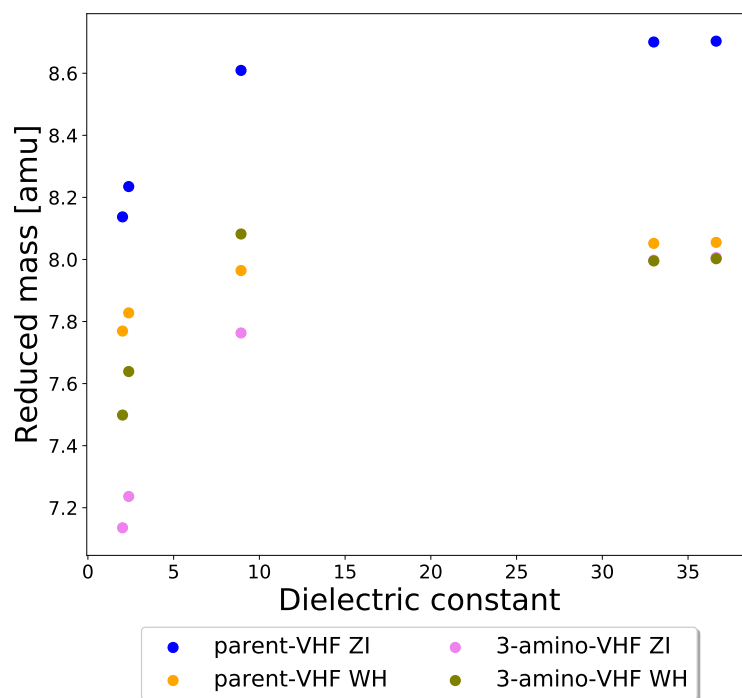

Figure 5: Reduced mass as a function of the dielectric constant for the DHA/VHF systems.

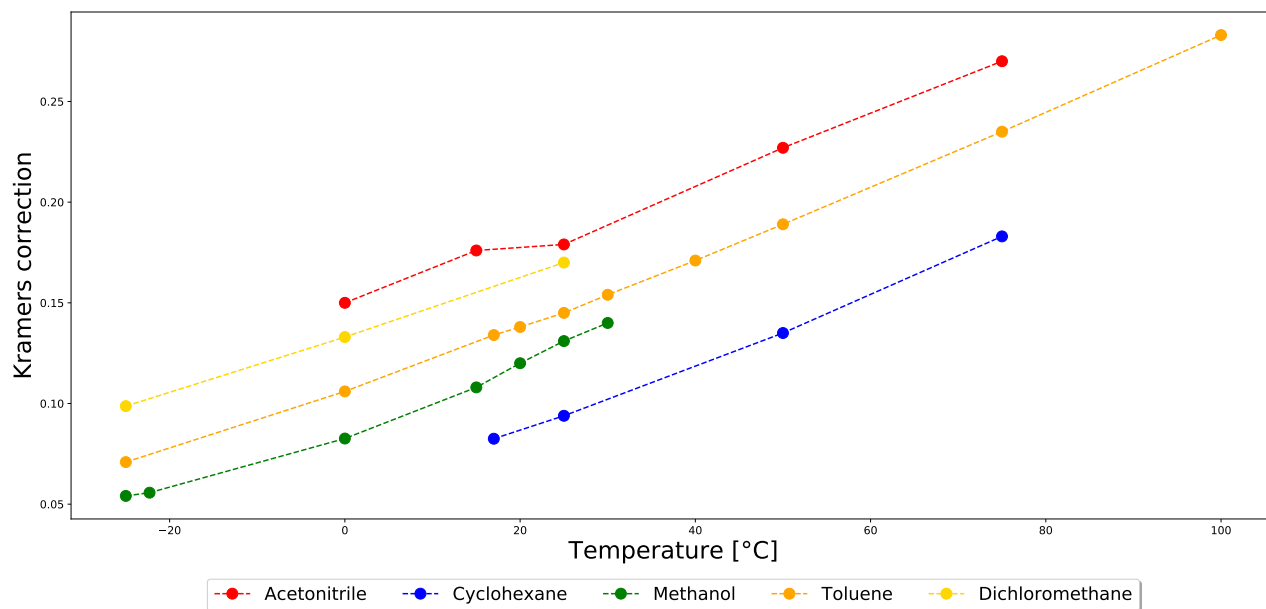

Figure 6: Kramers' correction as a function of the temperature for the A-QC system.

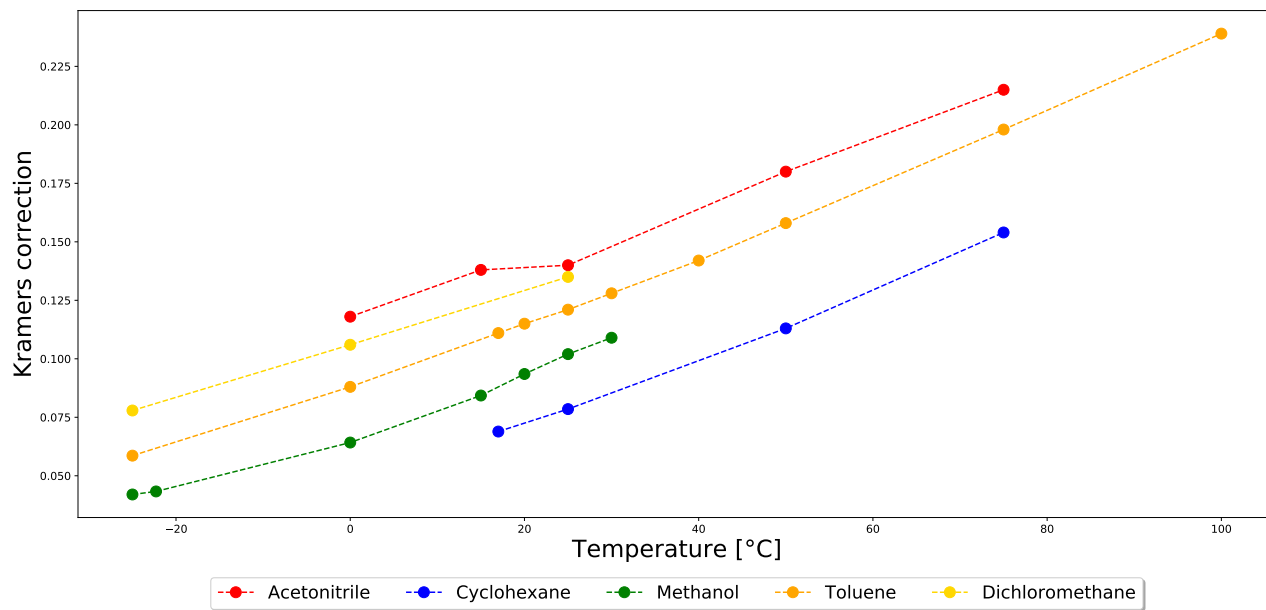

Figure 7: Kramers' correction as a function of the temperature for the C-QC system.



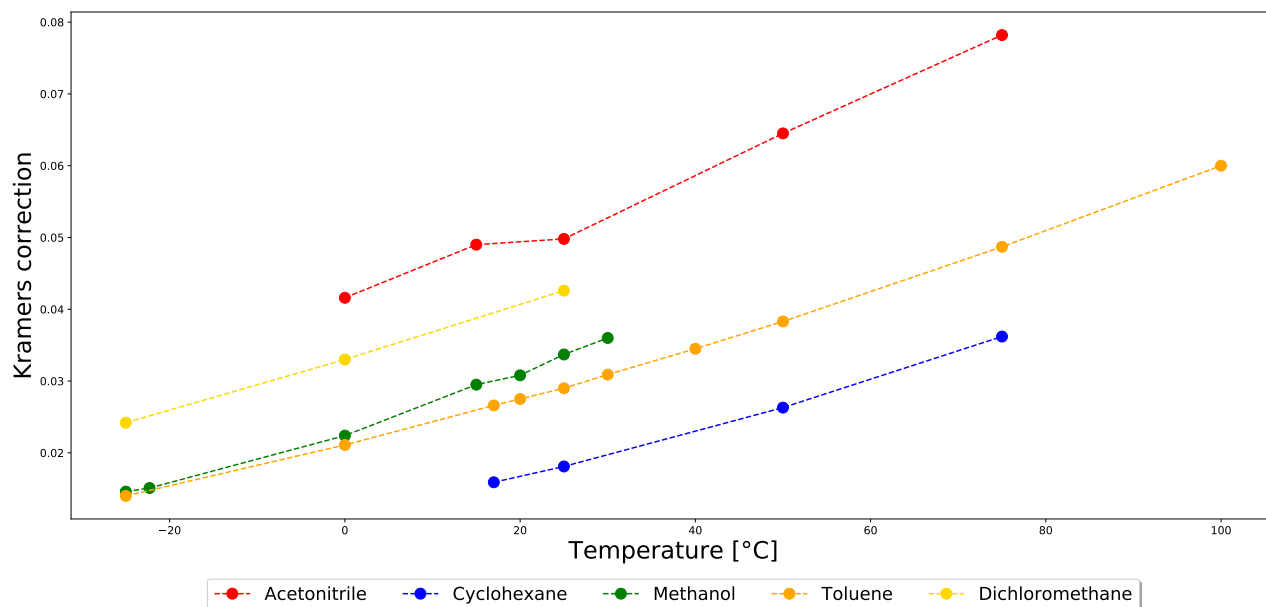

Figure 8: Kramers' correction as a function of the temperature for the parent-VHF ZI system.

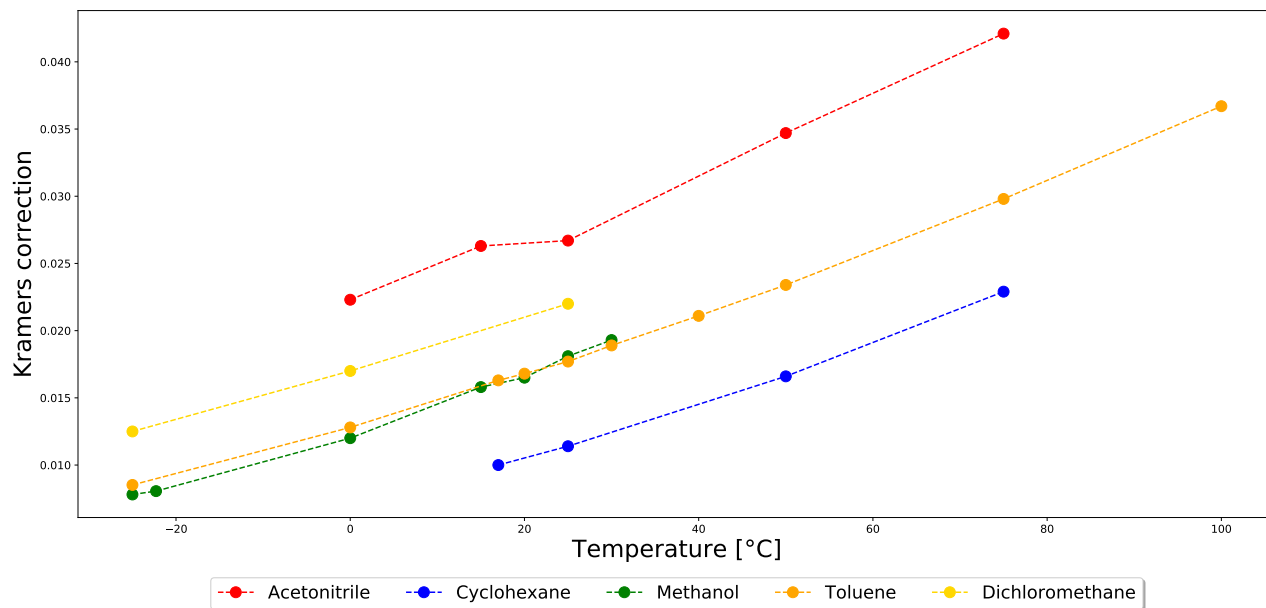

Figure 9: Kramers' correction as a function of the temperature for the parent-VHF WH system.

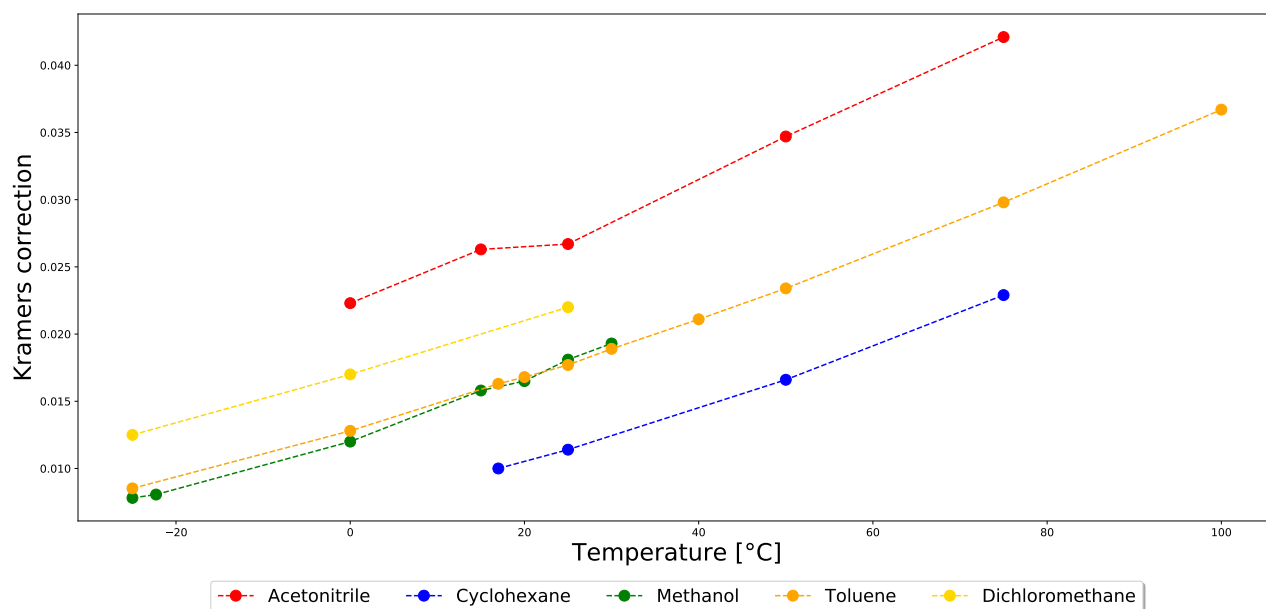

Figure 10: Kramers' correction as a function of the temperature for the 3-amino-VHF ZI system.

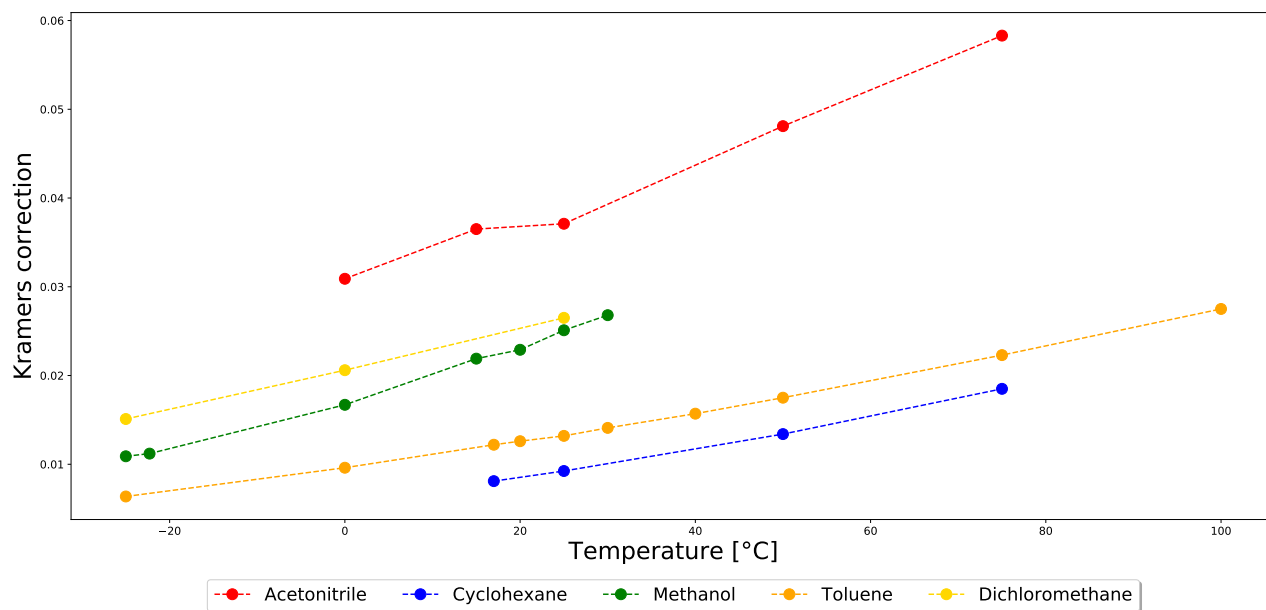

Figure 11: Kramers' correction as a function of the temperature for the 3-amino-VHF WH system.
